# Supplementary material for: Феномен «Будущего американца» в творчестве Ч. У. Чесната (роман «Дом позади кедров»)
Source: PeerJ journal article supplement (doi:10.7717/peerj.7660), 2014-01-01

## Raw data (results of HRM genotyping from DNA melting)

Excel Analysed Data Export

Copyright (c) 2013 QIAGEN GmbH. All Rights Reserved.

File panax HRM\_rbcL2(1).rex

Operator

Run Id

Notes

Machine Serial No 814137

| Channel | Gain     |
|---------|----------|
| Green   | 5        |
| Yellow  | 5        |
| Orange  | 5        |
| Red     | 5        |
| HRM     | -2.66667 |
| Crimson | 7        |

| Channel | Threshold |
|---------|-----------|
|---------|-----------|

HRM A.HRM (Page 1)

Cycling A.Green (Page 1)

Melt analysis of HRM A.HRM (Page 1)

| No. | Color    | Name                     | Genotype | Peak 1 | Peak 2 | Peak 3 | Peak 4 | Peak 5 | Peak 6 | Peak 7 |
|-----|----------|--------------------------|----------|--------|--------|--------|--------|--------|--------|--------|
| 1   | 255      | QBG Phytolacca americana |          | 60.8   | 61.15  | 61.97  | 62.45  | 63     | 63.53  | 64.23  |
| 2   | 4194432  | QBG Phytolacca japonica  |          | 60.87  | 61.98  | 62.25  | 63.17  | 63.4   | 64.05  | 64.9   |
| 3   | 16711680 | QBG Talinum crassifolium |          | 60.78  | 61.08  | 61.67  | 62     | 62.38  | 62.95  | 63.55  |
| 4   | 13491072 | QBG Talinum fruticosum   |          | 60.45  | 61.3   | 61.83  | 62.33  | 62.88  | 63.48  | 63.95  |
| 5   | 12615680 | QBG Talinum paniculatum  |          | 60.18  | 60.53  | 61.1   | 61.5   | 62     | 62.53  | 62.95  |
| 6   | 16744448 | QBG Talinum triangulare  |          | 60.85  | 61.15  | 61.58  | 61.9   | 62.52  | 63.15  | 63.55  |
| 7   | 8421376  | Other                    |          | 60.93  | 61.38  | 61.73  | 62.3   | 62.68  | 63.22  | 64.05  |
| 8   | 4227327  | Panax ginseng            |          | 60.73  | 61.18  | 61.75  | 62.37  | 62.85  | 63.2   | 63.48  |

|    |          |                               |       |       |       |       |       |       |       |
|----|----------|-------------------------------|-------|-------|-------|-------|-------|-------|-------|
| 9  | 1677088  | Talinum triangulare2          | 60.53 | 61.17 | 61.95 | 63.25 | 64    | 64.43 | 64.63 |
| 10 | 16711935 | Talinum paniculatum2          | 60.28 | 61.38 | 61.9  | 62.43 | 62.82 | 63.6  | 64.28 |
| 11 | 197379   | Talinum triangulare3          | 60.5  | 60.95 | 61.55 | 62.6  | 63.08 | 63.6  | 64.3  |
| 12 | 13158400 | Talinum triangulare1          | 60.85 | 61.07 | 61.7  | 62.33 | 63.35 | 63.88 | 64.45 |
| 13 | 8404992  | Phytolacca americana1         | 60.15 | 60.7  | 61.18 | 61.75 | 62.27 | 63.05 | 63.9  |
| 14 | 8510085  | Phytolacca americana root dry | 60.45 | 61.15 | 61.75 | 62.45 | 62.97 | 63.38 | 63.97 |
| 15 | 11893982 | Panax ginseng root dry        | 60.55 | 60.98 | 61.53 | 61.95 | 62.55 | 62.95 | 63.47 |
| 16 | 14395776 | Panax notoginseng             | 60.93 | 61.47 | 62.6  | 63.18 | 63.42 | 64.15 | 64.87 |
| 17 | 14450322 | Panax notoginseng root dry    | 60.58 | 61.2  | 61.7  | 62.37 | 63.27 | 63.98 | 64.58 |
| 18 | 14515654 | negative                      | 60.45 | 60.7  | 61.22 | 61.77 | 62.43 | 63.15 | 63.83 |

| No. | Color    | Name                          | Genotype | Peak 8 | Peak 9 | Peak 10 | Peak 11 | Peak 12 | Peak 13 | Peak 14 |
|-----|----------|-------------------------------|----------|--------|--------|---------|---------|---------|---------|---------|
| 1   | 255      | QBG Phytolacca americana      |          | 64.75  | 65.1   | 65.58   | 66.13   | 66.55   | 66.98   | 67.45   |
| 2   | 4194432  | QBG Phytolacca japonica       |          | 65.47  | 65.93  | 66.22   | 66.7    | 67.15   | 67.65   | 68.02   |
| 3   | 16711680 | QBG Talinum crassifolium      |          | 63.95  | 64.63  | 65      | 65.6    | 66.08   | 66.35   | 66.65   |
| 4   | 13491072 | QBG Talinum fruticosum        |          | 64.28  | 64.68  | 65.58   | 66.35   | 66.85   | 67.27   | 67.62   |
| 5   | 12615680 | QBG Talinum paniculatum       |          | 63.35  | 63.77  | 64.3    | 64.85   | 65.35   | 65.9    | 66.45   |
| 6   | 16744448 | QBG Talinum triangulare       |          | 64.37  | 64.88  | 65.3    | 65.88   | 66.53   | 67.4    | 68.12   |
| 7   | 8421376  | Other                         |          | 64.55  | 64.97  | 65.38   | 66.1    | 66.68   | 67.27   | 68      |
| 8   | 4227327  | Panax ginseng                 |          | 63.95  | 64.4   | 64.62   | 65.1    | 65.65   | 66.08   | 66.85   |
| 9   | 1677088  | Talinum triangulare2          |          | 65.22  | 65.53  | 65.9    | 66.38   | 67.2    | 67.73   | 68.35   |
| 10  | 16711935 | Talinum paniculatum2          |          | 64.85  | 65.3   | 65.88   | 66.55   | 66.98   | 67.35   | 67.82   |
| 11  | 197379   | Talinum triangulare3          |          | 64.95  | 65.33  | 65.78   | 66.3    | 67.3    | 68.08   | 68.55   |
| 12  | 13158400 | Talinum triangulare1          |          | 65     | 65.73  | 66.15   | 66.57   | 66.97   | 67.65   | 68      |
| 13  | 8404992  | Phytolacca americana1         |          | 64.33  | 64.73  | 64.95   | 65.55   | 66.12   | 66.82   | 67.67   |
| 14  | 8510085  | Phytolacca americana root dry |          | 64.68  | 65.22  | 65.55   | 66.03   | 66.42   | 66.82   | 67.25   |
| 15  | 11893982 | Panax ginseng root dry        |          | 64.23  | 64.85  | 65.25   | 65.9    | 66.45   | 66.97   | 67.35   |
| 16  | 14395776 | Panax notoginseng             |          | 65.35  | 65.8   | 66.35   | 66.82   | 67.28   | 67.75   | 68.12   |
| 17  | 14450322 | Panax notoginseng root dry    |          | 64.97  | 65.35  | 65.68   | 66.1    | 66.8    | 67.65   | 68.03   |
| 18  | 14515654 | negative                      |          | 64.37  | 64.65  | 65.05   | 65.58   | 66.13   | 66.82   | 67.07   |

| No. | Color    | Name                     | Genotype | Peak 15 | Peak 16 | Peak 17 | Peak 18 | Peak 19 | Peak 20 | Peak 21 |
|-----|----------|--------------------------|----------|---------|---------|---------|---------|---------|---------|---------|
| 1   | 255      | QBG Phytolacca americana |          | 68      | 68.95   | 69.5    | 70.17   | 70.62   | 71.08   | 71.73   |
| 2   | 4194432  | QBG Phytolacca japonica  |          | 68.45   | 68.82   | 69.25   | 69.95   | 70.58   | 71.22   | 72      |
| 3   | 16711680 | QBG Talinum crassifolium |          | 67.03   | 67.35   | 67.75   | 68.17   | 68.75   | 69.3    | 69.75   |
| 4   | 13491072 | QBG Talinum fruticosum   |          | 68.3    | 68.95   | 69.48   | 70.18   | 70.75   | 71.7    | 72.15   |
| 5   | 12615680 | QBG Talinum paniculatum  |          | 66.98   | 67.45   | 67.93   | 68.55   | 69.42   | 69.98   | 70.15   |
| 6   | 16744448 | QBG Talinum triangulare  |          | 68.65   | 69.18   | 69.87   | 70.55   | 71.1    | 71.95   | 72.45   |

|    |          |                               |       |       |       |       |       |       |       |
|----|----------|-------------------------------|-------|-------|-------|-------|-------|-------|-------|
| 7  | 8421376  | Other                         | 68.45 | 68.82 | 69.25 | 69.73 | 70.05 | 70.48 | 71.28 |
| 8  | 4227327  | Panax ginseng                 | 67.25 | 68.13 | 68.7  | 69.25 | 70.05 | 70.35 | 70.73 |
| 9  | 1677088  | Talinum triangulare2          | 69.07 | 69.5  | 70.18 | 70.75 | 71.1  | 71.5  | 71.8  |
| 10 | 16711935 | Talinum paniculatum2          | 68.48 | 69.2  | 69.85 | 70.35 | 70.97 | 71.9  | 72.25 |
| 11 | 197379   | Talinum triangulare3          | 69.2  | 69.67 | 69.97 | 70.5  | 71.17 | 71.83 | 72.45 |
| 12 | 13158400 | Talinum triangulare1          | 68.73 | 69.2  | 69.57 | 70.3  | 70.63 | 71.18 | 71.65 |
| 13 | 8404992  | Phytolacca americana1         | 68.15 | 68.85 | 69.53 | 70.12 | 70.7  | 71.15 | 71.62 |
| 14 | 8510085  | Phytolacca americana root dry | 67.75 | 68.27 | 69    | 69.45 | 70.25 | 70.67 | 71.05 |
| 15 | 11893982 | Panax ginseng root dry        | 68    | 68.55 | 69.4  | 70.08 | 71.15 | 71.62 | 71.85 |
| 16 | 14395776 | Panax notoginseng             | 68.67 | 69.25 | 69.7  | 69.9  | 70.53 | 71.1  | 72    |
| 17 | 14450322 | Panax notoginseng root dry    | 68.35 | 68.75 | 69.38 | 69.9  | 70.35 | 71.35 | 71.72 |
| 18 | 14515654 | negative                      | 67.62 | 68.27 | 68.8  | 68.95 | 69.65 | 70.27 | 70.72 |

| No. | Color    | Name                          | Genotype | Peak 22 | Peak 23 | Peak 24 | Peak 25 | Peak 26 | Peak 27 | Peak 28 |
|-----|----------|-------------------------------|----------|---------|---------|---------|---------|---------|---------|---------|
| 1   | 255      | QBG Phytolacca americana      |          | 72.6    | 73.3    | 73.83   | 74.5    | 75.35   | 76.55   | 77.88   |
| 2   | 4194432  | QBG Phytolacca japonica       |          | 72.47   | 73.17   | 73.97   | 74.85   | 75.25   | 75.85   | 76.33   |
| 3   | 16711680 | QBG Talinum crassifolium      |          | 70.25   | 70.73   | 71.45   | 72.03   | 72.4    | 72.93   | 73.65   |
| 4   | 13491072 | QBG Talinum fruticosum        |          | 72.77   | 73.08   | 73.67   | 74.15   | 74.5    | 75.3    | 76.2    |
| 5   | 12615680 | QBG Talinum paniculatum       |          | 70.45   | 71      | 71.63   | 72.32   | 72.8    | 73.2    | 73.8    |
| 6   | 16744448 | QBG Talinum triangulare       |          | 72.65   | 73.3    | 73.92   | 74.42   | 75.2    | 75.67   | 76.4    |
| 7   | 8421376  | Other                         |          | 71.9    | 72.45   | 72.95   | 73.52   | 73.97   | 74.25   | 74.6    |
| 8   | 4227327  | Panax ginseng                 |          | 71.18   | 71.72   | 72.15   | 72.53   | 72.93   | 73.25   | 73.65   |
| 9   | 1677088  | Talinum triangulare2          |          | 72.3    | 72.88   | 73.6    | 74.2    | 75.1    | 75.72   | 76.17   |
| 10  | 16711935 | Talinum paniculatum2          |          | 72.62   | 73.25   | 73.88   | 74.6    | 75.33   | 75.75   | 76.3    |
| 11  | 197379   | Talinum triangulare3          |          | 73.37   | 73.7    | 74.55   | 74.98   | 75.3    | 75.68   | 76.25   |
| 12  | 13158400 | Talinum triangulare1          |          | 72.15   | 72.43   | 72.98   | 73.25   | 73.55   | 73.83   | 74.35   |
| 13  | 8404992  | Phytolacca americana1         |          | 72.05   | 72.9    | 73.62   | 73.97   | 74.75   | 75.27   | 75.87   |
| 14  | 8510085  | Phytolacca americana root dry |          | 71.63   | 72.6    | 73.08   | 73.7    | 74.23   | 74.57   | 75.2    |
| 15  | 11893982 | Panax ginseng root dry        |          | 72.27   | 72.7    | 73.28   | 73.93   | 74.25   | 74.93   | 75.7    |
| 16  | 14395776 | Panax notoginseng             |          | 72.7    | 73.4    | 73.93   | 74.72   | 75.05   | 75.4    | 76.42   |
| 17  | 14450322 | Panax notoginseng root dry    |          | 72.12   | 72.45   | 72.95   | 73.6    | 73.85   | 74.35   | 74.77   |
| 18  | 14515654 | negative                      |          | 71.65   | 73      | 73.62   | 74.45   | 75.45   | 75.88   | 76.92   |

| No. | Color    | Name                     | Genotype | Peak 29 | Peak 30 | Peak 31 | Peak 32 | Peak 33 | Peak 34 | Peak 35 |
|-----|----------|--------------------------|----------|---------|---------|---------|---------|---------|---------|---------|
| 1   | 255      | QBG Phytolacca americana |          | 78.35   | 78.83   | 79.27   | 79.67   | 81.28   | 81.88   | 83.63   |
| 2   | 4194432  | QBG Phytolacca japonica  |          | 76.68   | 77.08   | 77.5    | 78.3    | 78.9    | 79.47   | 81.23   |
| 3   | 16711680 | QBG Talinum crassifolium |          | 73.98   | 74.55   | 74.95   | 75.37   | 75.92   | 76.45   | 76.88   |
| 4   | 13491072 | QBG Talinum fruticosum   |          | 76.92   | 77.4    | 78.42   | 78.7    | 79.3    | 80.55   | 82.73   |

|    |          |                               |       |       |       |       |       |       |       |
|----|----------|-------------------------------|-------|-------|-------|-------|-------|-------|-------|
| 5  | 12615680 | QBG Talinum paniculatum       | 74.3  | 75.15 | 75.73 | 76.35 | 76.75 | 77.2  | 77.55 |
| 6  | 16744448 | QBG Talinum triangulare       | 77.1  | 77.58 | 77.97 | 78.35 | 79.3  | 79.95 | 80.47 |
| 7  | 8421376  | Other                         | 75.02 | 75.35 | 75.9  | 76.65 | 77.45 | 77.9  | 78.15 |
| 8  | 4227327  | Panax ginseng                 | 74.02 | 74.38 | 74.95 | 75.57 | 75.95 | 76.65 | 76.87 |
| 9  | 1677088  | Talinum triangulare2          | 76.95 | 77.35 | 77.93 | 78.7  | 79.25 | 79.73 | 80.07 |
| 10 | 16711935 | Talinum paniculatum2          | 77.15 | 77.92 | 78.5  | 79.1  | 80.88 | 81.27 | 81.93 |
| 11 | 197379   | Talinum triangulare3          | 77.1  | 77.98 | 78.45 | 79.4  | 80    | 80.45 | 80.93 |
| 12 | 13158400 | Talinum triangulare1          | 75    | 75.5  | 75.95 | 76.65 | 77.05 | 77.43 | 78.08 |
| 13 | 8404992  | Phytolacca americana1         | 76.43 | 76.92 | 77.38 | 78.03 | 78.42 | 78.72 | 79.25 |
| 14 | 8510085  | Phytolacca americana root dry | 75.72 | 76.18 | 76.6  | 77.25 | 77.55 | 78    | 78.3  |
| 15 | 11893982 | Panax ginseng root dry        | 76.3  | 76.77 | 77.2  | 77.6  | 77.93 | 78.4  | 79.15 |
| 16 | 14395776 | Panax notoginseng             | 76.95 | 77.55 | 78.23 | 78.85 | 79.38 | 79.88 | 80.38 |
| 17 | 14450322 | Panax notoginseng root dry    | 75.4  | 75.9  | 76.27 | 76.87 | 77.42 | 77.78 | 78.47 |
| 18 | 14515654 | negative                      | 77.38 | 77.82 | 78.33 | 78.65 | 79.1  | 79.72 | 80.05 |

| No. | Color    | Name                          | Genotype | Peak 36 | Peak 37 | Peak 38 | Peak 39 | Peak 40 | Peak 41 | Peak 42 |
|-----|----------|-------------------------------|----------|---------|---------|---------|---------|---------|---------|---------|
| 1   | 255      | QBG Phytolacca americana      |          | 86.2    | 86.78   | 87.23   | 87.63   | 88.1    | 88.8    | 89.1    |
| 2   | 4194432  | QBG Phytolacca japonica       |          | 81.75   | 82.22   | 83.52   | 85.9    | 86.43   | 86.92   | 87.58   |
| 3   | 16711680 | QBG Talinum crassifolium      |          | 77.4    | 78.17   | 78.6    | 79.25   | 79.65   | 80.25   | 81.48   |
| 4   | 13491072 | QBG Talinum fruticosum        |          | 83      | 84.8    | 85.23   | 86.63   | 87.17   | 87.73   |         |
| 5   | 12615680 | QBG Talinum paniculatum       |          | 77.95   | 78.87   | 79.33   | 79.95   | 81.28   | 81.8    | 83.5    |
| 6   | 16744448 | QBG Talinum triangulare       |          | 81.3    | 81.95   | 83.5    | 85.97   | 86.9    |         |         |
| 7   | 8421376  | Other                         |          | 78.45   | 78.9    | 80.25   | 80.78   | 81.03   | 83.4    | 85.52   |
| 8   | 4227327  | Panax ginseng                 |          | 77.35   | 77.75   | 78.18   | 79.18   | 81.28   | 81.75   | 83.6    |
| 9   | 1677088  | Talinum triangulare2          |          | 81.2    | 83.4    |         |         |         |         |         |
| 10  | 16711935 | Talinum paniculatum2          |          | 83.47   | 85.3    | 85.83   | 86.23   | 86.75   | 87.2    | 87.8    |
| 11  | 197379   | Talinum triangulare3          |          | 81.25   | 81.98   | 83.57   | 85.95   |         |         |         |
| 12  | 13158400 | Talinum triangulare1          |          | 78.97   | 80.25   | 81.1    | 83.55   | 85.97   | 87      |         |
| 13  | 8404992  | Phytolacca americana1         |          | 81.25   | 81.85   | 83.63   | 86.28   | 86.65   | 87.28   | 87.77   |
| 14  | 8510085  | Phytolacca americana root dry |          | 78.7    | 79.13   | 80.05   | 80.7    | 81.13   | 81.5    | 82      |
| 15  | 11893982 | Panax ginseng root dry        |          | 79.92   | 80.45   | 81.27   | 81.83   | 83.58   | 85.78   | 86.18   |
| 16  | 14395776 | Panax notoginseng             |          | 82.73   | 85.48   | 86.03   | 86.45   | 86.95   | 87.5    | 87.9    |
| 17  | 14450322 | Panax notoginseng root dry    |          | 79.03   | 79.65   | 80.25   | 82.77   |         |         |         |
| 18  | 14515654 | negative                      |          | 81.15   | 81.62   | 82.6    | 83.32   | 83.9    | 84.93   | 85.22   |

| No. | Color   | Name                     | Genotype | Peak 43 | Peak 44 | Peak 45 | Peak 46 | Peak 47 | Peak 48 | Peak 49 |
|-----|---------|--------------------------|----------|---------|---------|---------|---------|---------|---------|---------|
| 1   | 255     | QBG Phytolacca americana |          | 89.7    |         |         |         |         |         |         |
| 2   | 4194432 | QBG Phytolacca japonica  |          | 88.18   | 89.27   | 89.58   |         |         |         |         |

|    |          |                               |       |       |       |       |       |       |      |
|----|----------|-------------------------------|-------|-------|-------|-------|-------|-------|------|
| 3  | 16711680 | QBG Talinum crassifolium      | 81.83 | 82.47 | 84.08 | 86.68 | 88.47 |       |      |
| 4  | 13491072 | QBG Talinum fruticosum        |       |       |       |       |       |       |      |
| 5  | 12615680 | QBG Talinum paniculatum       | 85.75 | 86.2  | 86.82 | 87.28 | 87.72 | 88.23 | 88.6 |
| 6  | 16744448 | QBG Talinum triangulare       |       |       |       |       |       |       |      |
| 7  | 8421376  | Other                         | 85.95 | 86.37 | 87.02 | 88.15 | 89.52 |       |      |
| 8  | 4227327  | Panax ginseng                 | 86.3  | 86.75 | 88.75 |       |       |       |      |
| 9  | 1677088  | Talinum triangulare2          |       |       |       |       |       |       |      |
| 10 | 16711935 | Talinum paniculatum2          | 88.5  | 89.05 | 89.47 | 89.77 |       |       |      |
| 11 | 197379   | Talinum triangulare3          |       |       |       |       |       |       |      |
| 12 | 13158400 | Talinum triangulare1          |       |       |       |       |       |       |      |
| 13 | 8404992  | Phytolacca americana1         | 88.45 | 88.67 | 89.17 | 89.82 |       |       |      |
| 14 | 8510085  | Phytolacca americana root dry | 83.57 | 86.23 | 86.72 | 87.55 |       |       |      |
| 15 | 11893982 | Panax ginseng root dry        | 86.87 | 87.45 | 87.95 | 89.12 | 89.35 |       |      |
| 16 | 14395776 | Panax notoginseng             | 88.27 | 89    | 89.52 |       |       |       |      |
| 17 | 14450322 | Panax notoginseng root dry    |       |       |       |       |       |       |      |
| 18 | 14515654 | negative                      | 85.7  | 86.25 | 86.65 | 87.28 | 87.65 | 88.55 |      |

| No. | Color    | Name                          | Genotype | Peak 50 | Peak 51 |
|-----|----------|-------------------------------|----------|---------|---------|
| 1   | 255      | QBG Phytolacca americana      |          |         |         |
| 2   | 4194432  | QBG Phytolacca japonica       |          |         |         |
| 3   | 16711680 | QBG Talinum crassifolium      |          |         |         |
| 4   | 13491072 | QBG Talinum fruticosum        |          |         |         |
| 5   | 12615680 | QBG Talinum paniculatum       | 89.02    | 89.42   |         |
| 6   | 16744448 | QBG Talinum triangulare       |          |         |         |
| 7   | 8421376  | Other                         |          |         |         |
| 8   | 4227327  | Panax ginseng                 |          |         |         |
| 9   | 1677088  | Talinum triangulare2          |          |         |         |
| 10  | 16711935 | Talinum paniculatum2          |          |         |         |
| 11  | 197379   | Talinum triangulare3          |          |         |         |
| 12  | 13158400 | Talinum triangulare1          |          |         |         |
| 13  | 8404992  | Phytolacca americana1         |          |         |         |
| 14  | 8510085  | Phytolacca americana root dry |          |         |         |
| 15  | 11893982 | Panax ginseng root dry        |          |         |         |
| 16  | 14395776 | Panax notoginseng             |          |         |         |
| 17  | 14450322 | Panax notoginseng root dry    |          |         |         |
| 18  | 14515654 | negative                      |          |         |         |

rbcl(1)

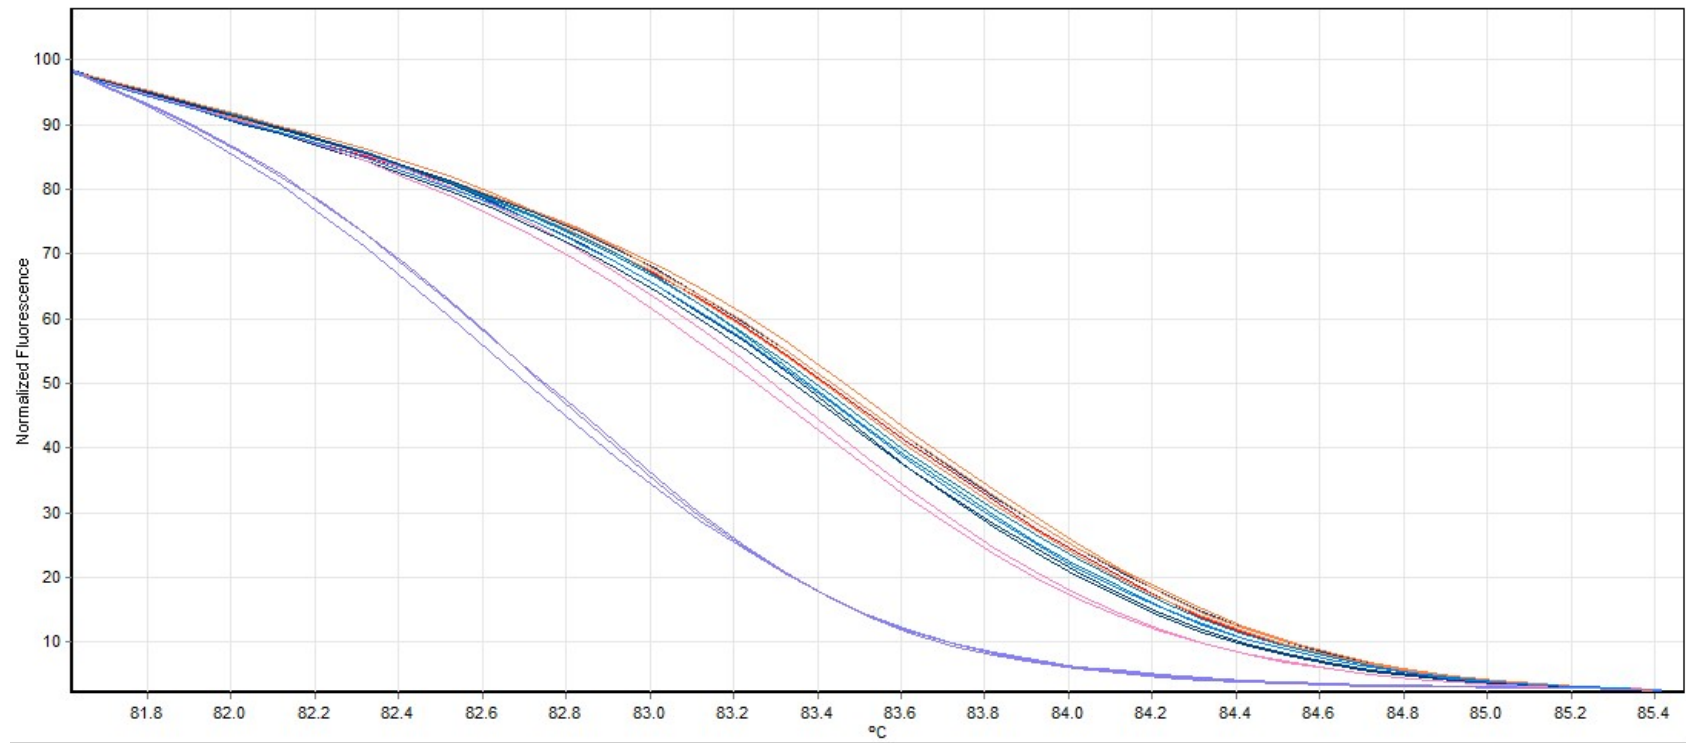

Excel Analysed Data Export

Copyright (c) 2013 QIAGEN GmbH. All Rights Reserved.

File panax HRM\_rbcl2(2).rex

Operator

Run Id

Notes

Machine Serial No 814137

Channel Gain

Green 5

Yellow 5  
 Orange 5  
 Red 5  
 HRM -2.66667  
 Crimson 7

Channel Threshold

HRM A.HRM (Page 0.13493  
 Cycling A.Green (Page 1)  
 Cycling A.HRM (Page 1)

Melt analysis of HRM A.HRM (Page 1)

| No. | Color        | Name                          | Genotype | Peak 1 | Peak 2 | Peak 3 | Peak 4 | Peak 5 | Peak 6 |
|-----|--------------|-------------------------------|----------|--------|--------|--------|--------|--------|--------|
| 1   | 255 QBG      | Phytolacca americana          |          | 60.85  | 61.21  | 62.1   | 62.57  | 62.96  | 63.71  |
| 2   | 4194432 QBG  | Phytolacca japonica           |          | 60.6   | 61.79  | 62.38  | 63.22  | 63.55  | 64.24  |
| 3   | 16711680 QBG | Talinum crassifolium          |          | 60.91  | 61.1   | 61.55  | 62.11  | 62.41  | 63.1   |
| 4   | 13491072 QBG | Talinum fruticosum            |          | 60.56  | 61.46  | 61.62  | 62.3   | 62.9   | 63.33  |
| 5   | 12615680 QBG | Talinum paniculatum           |          | 60.3   | 60.72  | 61.15  | 61.65  | 62.14  | 62.4   |
| 6   | 16744448 QBG | Talinum triangulare           |          | 60.77  | 61.2   | 61.62  | 61.89  | 62.25  | 63.07  |
| 7   | 8421376      | Other                         |          | 60.82  | 61.22  | 61.71  | 62.33  | 62.7   | 63.43  |
| 8   | 4227327      | Panax ginseng                 |          | 60.61  | 61.29  | 61.88  | 62.5   | 62.91  | 63.21  |
| 9   | 1677088      | Talinum triangulare2          |          | 60.7   | 61.28  | 61.67  | 63.57  | 64.1   | 64.37  |
| 10  | 16711935     | Talinum paniculatum2          |          | 60.32  | 61.46  | 61.86  | 62.18  | 62.98  | 63.52  |
| 11  | 197379       | Talinum triangulare3          |          | 60.69  | 60.98  | 61.48  | 62.67  | 63.2   | 63.9   |
| 12  | 13158400     | Talinum triangulare1          |          | 60.851 | 61.11  | 61.76  | 62.2   | 63.43  | 63.67  |
| 13  | 8404992      | Phytolacca americana1         |          | 60.34  | 60.81  | 61.4   | 61.77  | 62.12  | 63.17  |
| 14  | 8510085      | Phytolacca americana root dry |          | 60.27  | 61.08  | 61.39  | 62.3   | 62.9   | 63.44  |
| 15  | 11893982     | Panax ginseng root dry        |          | 60.59  | 60.79  | 61.61  | 61.99  | 62.34  | 62.87  |
| 16  | 14395776     | Panax notoginseng             |          | 60.87  | 61.25  | 62.2   | 63.42  | 63.7   | 64.2   |
| 17  | 14450322     | Panax notoginseng root dry    |          | 60.65  | 61.34  | 61.65  | 62.18  | 63.76  | 64.65  |
| 18  | 14515654     | negative                      |          |        |        |        |        |        |        |

| No. | Color       | Name                 | Genotype | Peak 8 | Peak 9 | Peak 10 | Peak 11 | Peak 12 | Peak 13 |
|-----|-------------|----------------------|----------|--------|--------|---------|---------|---------|---------|
| 1   | 255 QBG     | Phytolacca americana |          | 64.75  | 65.1   | 65.58   | 66.13   | 66.55   | 66.98   |
| 2   | 4194432 QBG | Phytolacca japonica  |          | 65.47  | 65.93  | 66.22   | 66.7    | 67.15   | 67.65   |

|    |          |            |                      |       |       |       |       |       |       |
|----|----------|------------|----------------------|-------|-------|-------|-------|-------|-------|
| 3  | 16711680 | QBG        | Talinum crassifolium | 63.95 | 64.63 | 65    | 65.6  | 66.08 | 66.35 |
| 4  | 13491072 | QBG        | Talinum fruticosum   | 64.28 | 64.68 | 65.58 | 66.35 | 66.85 | 67.27 |
| 5  | 12615680 | QBG        | Talinum paniculatum  | 63.35 | 64.3  | 65.35 | 67.45 | 79.95 | 81.28 |
| 6  | 16744448 | QBG        | Talinum triangulare  | 64.37 | 64.88 | 65.3  | 65.88 | 66.53 | 67.4  |
| 7  | 8421376  | Other      |                      | 64.55 | 64.97 | 65.38 | 66.1  | 66.68 | 67.27 |
| 8  | 4227327  | Panax      | ginseng              | 63.95 | 64.4  | 64.62 | 65.1  | 65.65 | 66.08 |
| 9  | 1677088  | Talinum    | triangulare2         | 65.22 | 65.53 | 65.9  | 66.38 | 67.2  | 67.73 |
| 10 | 16711935 | Talinum    | paniculatum2         | 64.85 | 65.3  | 65.88 | 66.55 | 66.98 | 67.35 |
| 11 | 197379   | Talinum    | triangulare3         | 64.95 | 65.33 | 65.78 | 66.3  | 67.3  | 68.08 |
| 12 | 13158400 | Talinum    | triangulare1         | 65    | 65.73 | 66.15 | 66.57 | 66.97 | 67.65 |
| 13 | 8404992  | Phytolacca | americana1           | 64.33 | 64.73 | 64.95 | 65.55 | 66.12 | 66.82 |
| 14 | 8510085  | Phytolacca | americana root dry   | 64.68 | 65.22 | 65.55 | 66.03 | 66.42 | 66.82 |
| 15 | 11893982 | Panax      | ginseng root dry     | 64.23 | 64.85 | 65.25 | 65.9  | 66.45 | 66.97 |
| 16 | 14395776 | Panax      | notoginseng          | 65.35 | 65.8  | 66.35 | 66.82 | 67.28 | 67.75 |
| 17 | 14450322 | Panax      | notoginseng root dry |       |       |       |       |       |       |
| 18 | 14515654 | negative   |                      |       |       |       |       |       |       |

| No. | Color    | Name                          | Genotype | Peak 15 | Peak 16 | Peak 17 | Peak 18 | Peak 19 | Peak 20 |
|-----|----------|-------------------------------|----------|---------|---------|---------|---------|---------|---------|
| 1   | 255      | QBG Phytolacca americana      |          | 68      | 68.95   | 69.5    | 70.17   | 71.08   | 71.73   |
| 2   | 4194432  | QBG Phytolacca japonica       |          | 68.45   | 68.82   | 69.25   | 69.95   | 70.58   | 71.22   |
| 3   | 16711680 | QBG Talinum crassifolium      |          | 67.03   | 67.35   | 67.75   | 68.17   | 68.75   | 69.3    |
| 4   | 13491072 | QBG Talinum fruticosum        |          | 68.3    | 68.95   | 69.48   | 76.2    | 78.7    | 79.3    |
| 5   | 12615680 | QBG Talinum paniculatum       |          | 83.5    |         |         |         |         |         |
| 6   | 16744448 | QBG Talinum triangulare       |          | 68.65   | 69.18   | 69.87   | 70.55   | 79.3    | 79.95   |
| 7   | 8421376  | Other                         |          | 68.45   | 68.82   | 69.25   | 69.73   | 70.05   | 70.48   |
| 8   | 4227327  | Panax ginseng                 |          | 67.25   | 68.13   | 68.7    | 69.25   | 70.05   | 70.35   |
| 9   | 1677088  | Talinum triangulare2          |          | 69.5    | 79.73   | 80.07   | 81.2    | 83.4    |         |
| 10  | 16711935 | Talinum paniculatum2          |          | 68.48   | 69.2    | 69.85   | 70.35   | 70.97   | 71.9    |
| 11  | 197379   | Talinum triangulare3          |          | 69.2    | 69.67   | 69.97   | 70.5    | 71.17   | 72.45   |
| 12  | 13158400 | Talinum triangulare1          |          | 68.73   | 69.2    | 70.3    | 80.25   | 81.1    | 83.55   |
| 13  | 8404992  | Phytolacca americana1         |          | 68.15   | 68.85   | 69.53   | 70.12   | 70.7    | 71.62   |
| 14  | 8510085  | Phytolacca americana root dry |          | 67.75   | 68.27   | 69      | 69.45   | 70.25   | 70.67   |
| 15  | 11893982 | Panax ginseng root dry        |          | 68      | 68.55   | 69.4    | 70.08   | 71.15   | 72.27   |
| 16  | 14395776 | Panax notoginseng             |          | 68.67   | 69.25   | 69.7    | 69.9    | 70.53   | 72.7    |
| 17  | 14450322 | Panax notoginseng root dry    |          |         |         |         |         |         |         |
| 18  | 14515654 | negative                      |          |         |         |         |         |         |         |

| No. | Color | Name | Genotype | Peak 22 | Peak 23 | Peak 24 | Peak 25 | Peak 26 | Peak 27 |
|-----|-------|------|----------|---------|---------|---------|---------|---------|---------|
|-----|-------|------|----------|---------|---------|---------|---------|---------|---------|



|    |               |                               |       |       |       |       |       |       |
|----|---------------|-------------------------------|-------|-------|-------|-------|-------|-------|
| 1  | 255 QBG       | Phytolacca americana          | 73.3  | 73.83 | 76.55 | 79.27 | 79.67 | 81.28 |
| 2  | 4194432 QBG   | Phytolacca japonica           | 72.47 | 73.17 | 73.97 | 77.5  | 78.3  | 79.47 |
| 3  | 16711680 QBG  | Talinum crassifolium          | 70.25 | 70.73 | 71.45 | 72.03 | 72.4  | 72.93 |
| 4  | 13491072 QBG  | Talinum fruticosum            | 82.73 | 83    |       |       |       |       |
| 5  | 12615680 QBG  | Talinum paniculatum           |       |       |       |       |       |       |
| 6  | 16744448 QBG  | Talinum triangulare           | 81.3  | 81.95 | 83.5  |       |       |       |
| 7  | 8421376 Other |                               | 72.45 | 80.25 | 80.78 | 81.03 | 83.4  |       |
| 8  | 4227327       | Panax ginseng                 | 71.18 | 71.72 | 75.95 | 78.18 | 79.18 | 81.28 |
| 9  | 1677088       | Talinum triangulare2          |       |       |       |       |       |       |
| 10 | 16711935      | Talinum paniculatum2          | 73.25 | 74.6  | 75.33 | 75.75 | 77.92 | 78.5  |
| 11 | 197379        | Talinum triangulare3          | 74.55 | 74.98 | 75.3  | 79.4  | 80    | 80.45 |
| 12 | 13158400      | Talinum triangulare1          |       |       |       |       |       |       |
| 13 | 8404992       | Phytolacca americana1         | 72.9  | 73.62 | 73.97 | 75.87 | 76.92 | 78.03 |
| 14 | 8510085       | Phytolacca americana root dry | 71.63 | 73.08 | 76.18 | 79.13 | 80.05 | 80.7  |
| 15 | 11893982      | Panax ginseng root dry        | 79.15 | 79.92 | 80.45 | 81.27 | 81.83 | 83.58 |
| 16 | 14395776      | Panax notoginseng             | 73.93 | 75.4  | 78.85 | 79.38 | 80.38 | 82.73 |
| 17 | 14450322      | Panax notoginseng root dry    |       |       |       |       |       |       |
| 18 | 14515654      | negative                      |       |       |       |       |       |       |

| No. | Color | Name                                  | Genotype | Peak 29 | Peak 30 | Peak 31 | Peak 32 | Peak 33 | Peak 34 |
|-----|-------|---------------------------------------|----------|---------|---------|---------|---------|---------|---------|
| 1   |       | 255 QBG Phytolacca americana          |          | 83.63   |         |         |         |         |         |
| 2   |       | 4194432 QBG Phytolacca japonica       |          | 81.75   | 82.22   | 83.52   |         |         |         |
| 3   |       | 16711680 QBG Talinum crassifolium     |          | 73.98   | 77.4    | 79.25   | 79.65   | 80.25   | 81.48   |
| 4   |       | 13491072 QBG Talinum fruticosum       |          |         |         |         |         |         |         |
| 5   |       | 12615680 QBG Talinum paniculatum      |          |         |         |         |         |         |         |
| 6   |       | 16744448 QBG Talinum triangulare      |          |         |         |         |         |         |         |
| 7   |       | 8421376 Other                         |          |         |         |         |         |         |         |
| 8   |       | 4227327 Panax ginseng                 |          | 83.6    |         |         |         |         |         |
| 9   |       | 1677088 Talinum triangulare2          |          |         |         |         |         |         |         |
| 10  |       | 16711935 Talinum paniculatum2         |          | 80.88   | 81.27   | 81.93   | 83.47   |         |         |
| 11  |       | 197379 Talinum triangulare3           |          | 81.25   | 81.98   | 83.57   |         |         |         |
| 12  |       | 13158400 Talinum triangulare1         |          |         |         |         |         |         |         |
| 13  |       | 8404992 Phytolacca americana1         |          | 81.25   | 81.85   | 83.63   |         |         |         |
| 14  |       | 8510085 Phytolacca americana root dry |          | 81.5    | 82      | 83.57   |         |         |         |
| 15  |       | 11893982 Panax ginseng root dry       |          |         |         |         |         |         |         |
| 16  |       | 14395776 Panax notoginseng            |          |         |         |         |         |         |         |
| 17  |       | 14450322 Panax notoginseng root dry   |          |         |         |         |         |         |         |

18 14515654 negative

---

| No. | Color    | Name                          | Genotype | Peak 36 | Peak 37 |
|-----|----------|-------------------------------|----------|---------|---------|
| 1   | 255      | QBG Phytolacca americana      |          |         |         |
| 2   | 4194432  | QBG Phytolacca japonica       |          |         |         |
| 3   | 16711680 | QBG Talinum crassifolium      |          | 82.47   | 84.08   |
| 4   | 13491072 | QBG Talinum fruticosum        |          |         |         |
| 5   | 12615680 | QBG Talinum paniculatum       |          |         |         |
| 6   | 16744448 | QBG Talinum triangulare       |          |         |         |
| 7   | 8421376  | Other                         |          |         |         |
| 8   | 4227327  | Panax ginseng                 |          |         |         |
| 9   | 1677088  | Talinum triangulare2          |          |         |         |
| 10  | 16711935 | Talinum paniculatum2          |          |         |         |
| 11  | 197379   | Talinum triangulare3          |          |         |         |
| 12  | 13158400 | Talinum triangulare1          |          |         |         |
| 13  | 8404992  | Phytolacca americana1         |          |         |         |
| 14  | 8510085  | Phytolacca americana root dry |          |         |         |
| 15  | 11893982 | Panax ginseng root dry        |          |         |         |
| 16  | 14395776 | Panax notoginseng             |          |         |         |
| 17  | 14450322 | Panax notoginseng root dry    |          |         |         |
| 18  | 14515654 | negative                      |          |         |         |

---

rbcl(2)

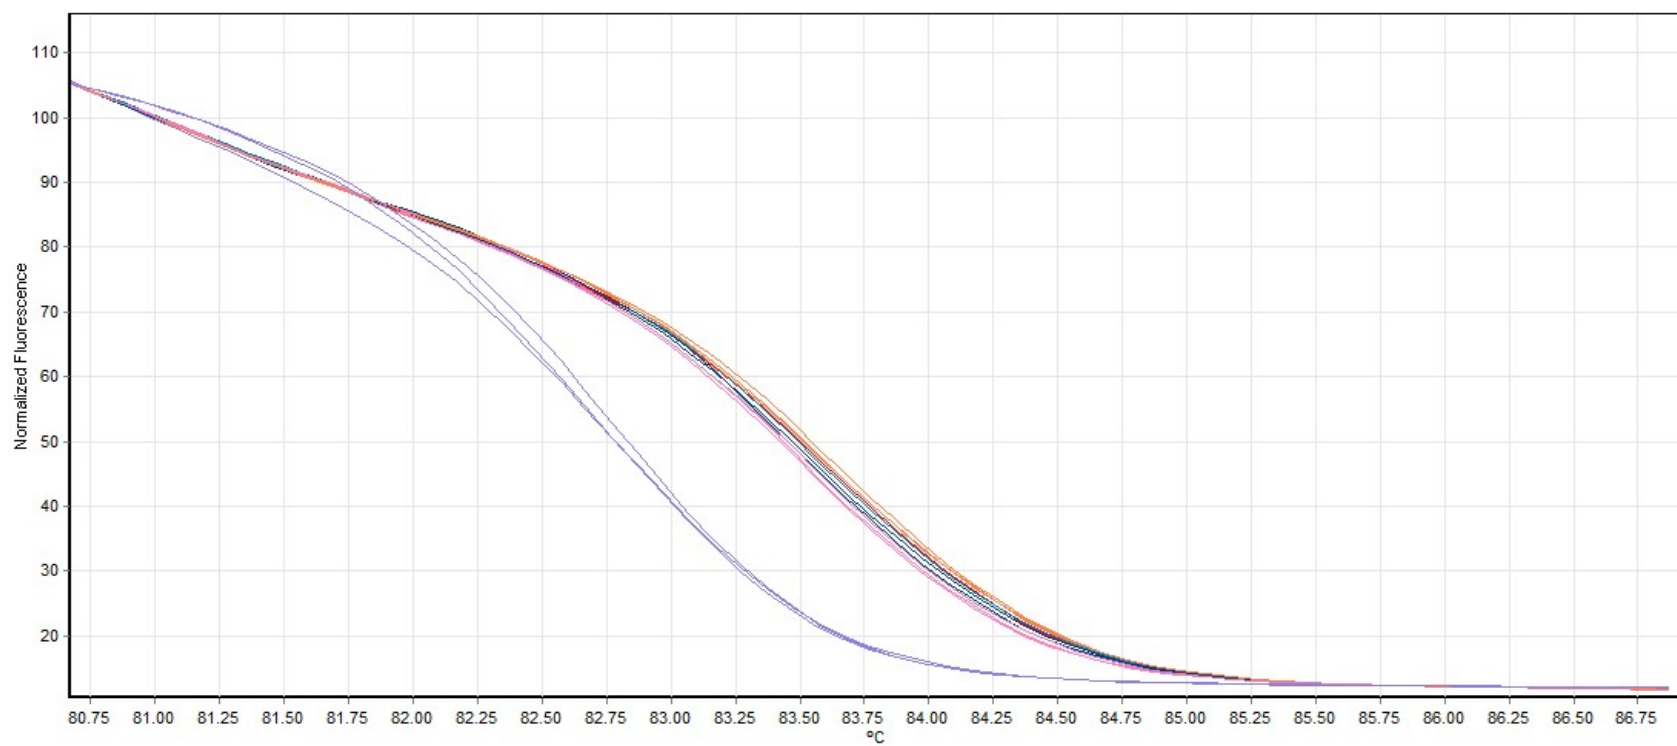

Excel Analysed Data Export

Copyright (c) 2013 QIAGEN GmbH. All Rights Reserved.

File panax HRM\_rbcl2(3).rex

Operator

Run Id

Notes

Machine Serial No 814137

Channel Gain

Green 5

Yellow 5

Orange 5  
 Red 5  
 HRM -2.66667  
 Crimson 7

Channel Threshold

HRM A.HRM (Page 0.04639  
 Cycling A.Green (Page 1)  
 Cycling A.HRM (Page 1)

Melt analysis of HRM A.HRM (Page 1)

| No. | Color    | Name                       | Genotype | Peak 1 | Peak 2 | Peak 3 | Peak 4 | Peak 5 | Peak 6 | Peak 7 |
|-----|----------|----------------------------|----------|--------|--------|--------|--------|--------|--------|--------|
| 1   | 255      | QBG Phytolacca americana   |          | 60.77  | 61.23  | 61.84  | 62.67  | 63.1   | 63.67  | 64.08  |
| 2   | 4194432  | QBG Phytolacca japonica    |          | 60.92  | 61.79  | 62.3   | 63.09  | 63.22  | 64.12  | 64.83  |
| 3   | 16711680 | QBG Talinum crassifolium   |          | 60.69  | 61.2   | 61.77  | 62.15  | 62.48  | 62.88  | 63.41  |
| 4   | 13491072 | QBG Talinum fruticosum     |          | 60.6   | 61.52  | 61.56  | 62.37  | 62.76  | 63.21  | 63.76  |
| 5   | 12615680 | QBG Talinum paniculatum    |          | 60.24  | 60.61  | 61.24  | 61.62  | 62.04  | 62.47  | 62.84  |
| 6   | 16744448 | QBG Talinum triangulare    |          | 60.71  | 61.32  | 61.61  | 61.84  | 62.48  | 63.3   | 63.61  |
| 7   | 8421376  | Other                      |          | 60.83  | 61.44  | 61.92  | 62.47  | 62.77  | 63.51  | 64.18  |
| 8   | 4227327  | Panax ginseng              |          | 60.68  | 61.3   | 61.67  | 62.14  | 62.91  | 63.17  | 63.31  |
| 9   | 1677088  | Talinum triangulare1       |          | 60.64  | 61.23  | 62.1   | 63.19  | 64.07  | 64.38  | 64.7   |
| 10  | 16711935 | Talinum paniculatum1       |          | 60.21  | 61.34  | 61.83  | 62.12  | 62.94  | 63.51  | 64.16  |
| 11  | 197379   | Talinum triangulare3       |          | 60.63  | 60.89  | 61.7   | 62.74  | 63.16  | 63.43  | 64.45  |
| 12  | 13158400 | Talinum triangulare2       |          | 60.78  | 61.22  | 61.88  | 62.21  | 63.2   | 63.77  | 64.36  |
| 13  | 8404992  | Phytolacca americana1      |          | 60.51  | 60.87  | 61.23  | 61.88  | 62.44  | 63.16  | 63.84  |
| 14  | 8510085  | Phytolacca americana1      |          | 60.48  | 61.42  | 61.56  | 62.36  | 62.81  | 63.24  | 64.1   |
| 15  | 11893982 | Panax ginseng root dry     |          | 60.59  | 60.86  | 61.64  | 62.1   | 62.62  | 62.87  | 63.23  |
| 16  | 14395776 | Panax notoginseng          |          | 60.9   | 61.21  | 62.71  | 63.2   | 63.71  | 64.08  | 64.66  |
| 17  | 14450322 | Panax notoginseng root dry |          | 60.82  | 61.33  | 61.89  | 62.44  | 63.6   | 63.95  | 64.71  |
| 18  | 14515654 | dH2O                       |          |        |        |        |        |        |        |        |

| No. | Color    | Name                     | Genotype | Peak 8 | Peak 9 | Peak 10 | Peak 11 | Peak 12 | Peak 13 | Peak 14 |
|-----|----------|--------------------------|----------|--------|--------|---------|---------|---------|---------|---------|
| 1   | 255      | QBG Phytolacca americana |          | 64.61  | 65.27  | 65.81   | 66.19   | 66.63   | 67      | 67.57   |
| 2   | 4194432  | QBG Phytolacca japonica  |          | 65.32  | 65.81  | 66.09   | 66.68   | 67.07   | 67.49   | 68.1    |
| 3   | 16711680 | QBG Talinum crassifolium |          | 63.8   | 64.57  | 65.11   | 65.72   | 66.29   | 66.34   | 66.82   |

|    |          |            |                      |       |       |       |       |       |       |       |
|----|----------|------------|----------------------|-------|-------|-------|-------|-------|-------|-------|
| 4  | 13491072 | QBG        | Talinum fruticosum   | 64.37 | 64.71 | 65.3  | 66.41 | 66.9  | 67    | 67.51 |
| 5  | 12615680 | QBG        | Talinum paniculatum  | 63.45 | 64.12 | 64.37 | 64.97 | 65.31 | 65.62 | 66.41 |
| 6  | 16744448 | QBG        | Talinum triangulare  | 64.32 | 64.52 | 64.85 | 64.97 | 65.12 | 65.69 | 66.04 |
| 7  | 8421376  | Other      |                      | 64.5  | 65.13 | 65.57 | 66.25 | 66.62 | 67.1  | 67.65 |
| 8  | 4227327  | Panax      | ginseng              | 63.7  | 64.25 | 64.71 | 65.02 | 65.68 | 66.15 | 66.62 |
| 9  | 1677088  | Talinum    | triangulare1         | 65.13 | 65.57 | 66.25 | 66.62 | 67.1  | 67.65 | 68.33 |
| 10 | 16711935 | Talinum    | paniculatum1         | 64.65 | 65.25 | 65.6  | 66.2  | 66.6  | 67.15 | 67.67 |
| 11 | 197379   | Talinum    | triangulare3         | 65.47 | 66.2  | 66.75 | 67.2  | 67.65 | 68.35 | 68.92 |
| 12 | 13158400 | Talinum    | triangulare2         | 65.37 | 65.85 | 66.33 | 66.68 | 67.43 | 68.22 | 68.76 |
| 13 | 8404992  | Phytolacca | americana1           | 64.43 | 64.71 | 64.96 | 65.61 | 66.19 | 66.37 | 66.87 |
| 14 | 8510085  | Phytolacca | americana1           | 64.45 | 64.88 | 65.28 | 65.58 | 66.3  | 66.55 | 66.77 |
| 15 | 11893982 | Panax      | ginseng root dry     | 64.55 | 65.38 | 66.2  | 66.81 | 67.2  | 67.65 | 68.35 |
| 16 | 14395776 | Panax      | notoginseng          | 64.95 | 65.35 | 65.73 | 66.55 | 66.89 | 67.1  | 67.55 |
| 17 | 14450322 | Panax      | notoginseng root dry | 64.65 | 65.05 | 65.58 | 66.13 | 66.82 | 67.07 | 67.83 |
| 18 | 14515654 | dH2O       |                      |       |       |       |       |       |       |       |

| No. | Color    | Name                       | Genotype | Peak 15 | Peak 16 | Peak 17 | Peak 18 | Peak 19 | Peak 20 | Peak 21 |
|-----|----------|----------------------------|----------|---------|---------|---------|---------|---------|---------|---------|
| 1   | 255      | QBG Phytolacca americana   |          | 68.11   | 68.89   | 69.47   | 70.23   | 70.71   | 71.2    | 71.87   |
| 2   | 4194432  | QBG Phytolacca japonica    |          | 68.56   | 68.97   | 69.19   | 69.87   | 70.42   | 71.19   | 71.78   |
| 3   | 16711680 | QBG Talinum crassifolium   |          | 67.3    | 67.87   | 68.02   | 68.36   | 68.89   | 69.15   | 69.7    |
| 4   | 13491072 | QBG Talinum fruticosum     |          | 68.19   | 68.92   | 69.47   | 70.1    | 70.62   | 71.54   | 72.07   |
| 5   | 12615680 | QBG Talinum paniculatum    |          | 67.25   | 67.47   | 68.81   | 69.28   | 69.58   | 70.04   | 70.29   |
| 6   | 16744448 | QBG Talinum triangulare    |          | 66.87   | 67.21   | 68.36   | 69.64   | 71.23   | 71.85   | 72.13   |
| 7   | 8421376  | Other                      |          | 68.33   | 68.85   | 69.35   | 69.84   | 70.21   | 70.63   | 71.1    |
| 8   | 4227327  | Panax ginseng              |          | 67.3    | 67.82   | 68.55   | 69.09   | 69.98   | 70.12   | 70.68   |
| 9   | 1677088  | Talinum triangulare1       |          | 68.85   | 69.35   | 70.1    | 70.66   | 71.09   | 71.43   | 71.96   |
| 10  | 16711935 | Talinum paniculatum1       |          | 68.33   | 69.17   | 69.63   | 70.38   | 71.1    | 71.67   | 72.38   |
| 11  | 197379   | Talinum triangulare3       |          | 69.5    | 69.88   | 69.97   | 70.24   | 71.02   | 71.83   | 72.22   |
| 12  | 13158400 | Talinum triangulare2       |          | 69.35   | 69.81   | 69.98   | 70.17   | 70.7    | 71.65   | 72.1    |
| 13  | 8404992  | Phytolacca americana1      |          | 67.4    | 68.42   | 69.27   | 70.1    | 70.38   | 71.08   | 71.78   |
| 14  | 8510085  | Phytolacca americana1      |          | 67.15   | 68.31   | 69.1    | 69.67   | 70.25   | 70.77   | 71.17   |
| 15  | 11893982 | Panax ginseng root dry     |          | 68.92   | 69.3    | 69.75   | 70.24   | 71.32   | 71.74   | 72.04   |
| 16  | 14395776 | Panax notoginseng          |          | 68.24   | 68.84   | 69.32   | 69.74   | 70.6    | 71.18   | 71.96   |
| 17  | 14450322 | Panax notoginseng root dry |          | 68.19   | 68.81   | 69.27   | 70.2    | 70.48   | 71.34   | 71.92   |
| 18  | 14515654 | dH2O                       |          |         |         |         |         |         |         |         |

| No. | Color | Name                     | Genotype | Peak 22 | Peak 23 | Peak 24 | Peak 25 | Peak 26 | Peak 27 | Peak 28 |
|-----|-------|--------------------------|----------|---------|---------|---------|---------|---------|---------|---------|
| 1   | 255   | QBG Phytolacca americana |          | 72.85   | 73.47   | 73.9    | 74.79   | 75.16   | 75.63   | 76.18   |



| No. | Color    | Name                       | Genotype | Peak 36 | Peak 37 | Peak 38 | Peak 39 | Peak 40 | Peak 41 | Peak 42 |
|-----|----------|----------------------------|----------|---------|---------|---------|---------|---------|---------|---------|
| 1   | 255      | QBG Phytolacca americana   |          |         |         |         |         |         |         |         |
| 2   | 4194432  | QBG Phytolacca japonica    |          | 81.64   | 82.22   | 83.52   |         |         |         |         |
| 3   | 16711680 | QBG Talinum crassifolium   |          | 77.27   | 78.17   | 78.6    | 79.25   | 79.65   | 80.25   | 81.48   |
| 4   | 13491072 | QBG Talinum fruticosum     |          | 83      |         |         |         |         |         |         |
| 5   | 12615680 | QBG Talinum paniculatum    |          | 77.95   | 78.87   | 79.33   | 79.95   | 81.28   | 81.8    | 83.5    |
| 6   | 16744448 | QBG Talinum triangulare    |          | 81.3    | 81.95   | 83.5    |         |         |         |         |
| 7   | 8421376  | Other                      |          | 78.96   | 78.9    | 80.25   | 80.78   | 81.03   | 83.4    |         |
| 8   | 4227327  | Panax ginseng              |          | 77.21   | 77.82   | 78.09   | 79.11   | 81.22   | 81.75   | 83.6    |
| 9   | 1677088  | Talinum triangulare1       |          | 81.2    | 83.4    |         |         |         |         |         |
| 10  | 16711935 | Talinum paniculatum1       |          | 83.47   | 85.3    |         |         |         |         |         |
| 11  | 197379   | Talinum triangulare3       |          | 81.25   | 81.98   | 83.57   |         |         |         |         |
| 12  | 13158400 | Talinum triangulare2       |          | 78.97   | 80.25   | 81.1    | 83.55   |         |         |         |
| 13  | 8404992  | Phytolacca americana1      |          | 81.25   | 81.85   | 83.63   |         |         |         |         |
| 14  | 8510085  | Phytolacca americana1      |          | 79.62   | 79.13   | 80.05   | 80.7    | 81.13   | 81.5    | 82      |
| 15  | 11893982 | Panax ginseng root dry     |          | 79.93   | 80.45   | 81.27   | 81.83   | 83.58   |         |         |
| 16  | 14395776 | Panax notoginseng          |          | 82.73   |         |         |         |         |         |         |
| 17  | 14450322 | Panax notoginseng root dry |          | 79.03   | 79.65   | 80.25   | 82.77   |         |         |         |
| 18  | 14515654 | dH2O                       |          |         |         |         |         |         |         |         |

| No. | Color    | Name                     | Genotype | Peak 43 | Peak 44 | Peak 45 |
|-----|----------|--------------------------|----------|---------|---------|---------|
| 1   | 255      | QBG Phytolacca americana |          |         |         |         |
| 2   | 4194432  | QBG Phytolacca japonica  |          |         |         |         |
| 3   | 16711680 | QBG Talinum crassifolium |          | 81.83   | 82.47   | 84.08   |
| 4   | 13491072 | QBG Talinum fruticosum   |          |         |         |         |
| 5   | 12615680 | QBG Talinum paniculatum  |          |         |         |         |
| 6   | 16744448 | QBG Talinum triangulare  |          |         |         |         |
| 7   | 8421376  | Other                    |          |         |         |         |
| 8   | 4227327  | Panax ginseng            |          |         |         |         |
| 9   | 1677088  | Talinum triangulare1     |          |         |         |         |
| 10  | 16711935 | Talinum paniculatum1     |          |         |         |         |
| 11  | 197379   | Talinum triangulare3     |          |         |         |         |
| 12  | 13158400 | Talinum triangulare2     |          |         |         |         |
| 13  | 8404992  | Phytolacca americana1    |          |         |         |         |
| 14  | 8510085  | Phytolacca americana1    |          | 83.57   |         |         |
| 15  | 11893982 | Panax ginseng root dry   |          |         |         |         |
| 16  | 14395776 | Panax notoginseng        |          |         |         |         |

17 14450322 Panax notoginseng root dry  
18 14515654 dH2O

---

rbcl(3)

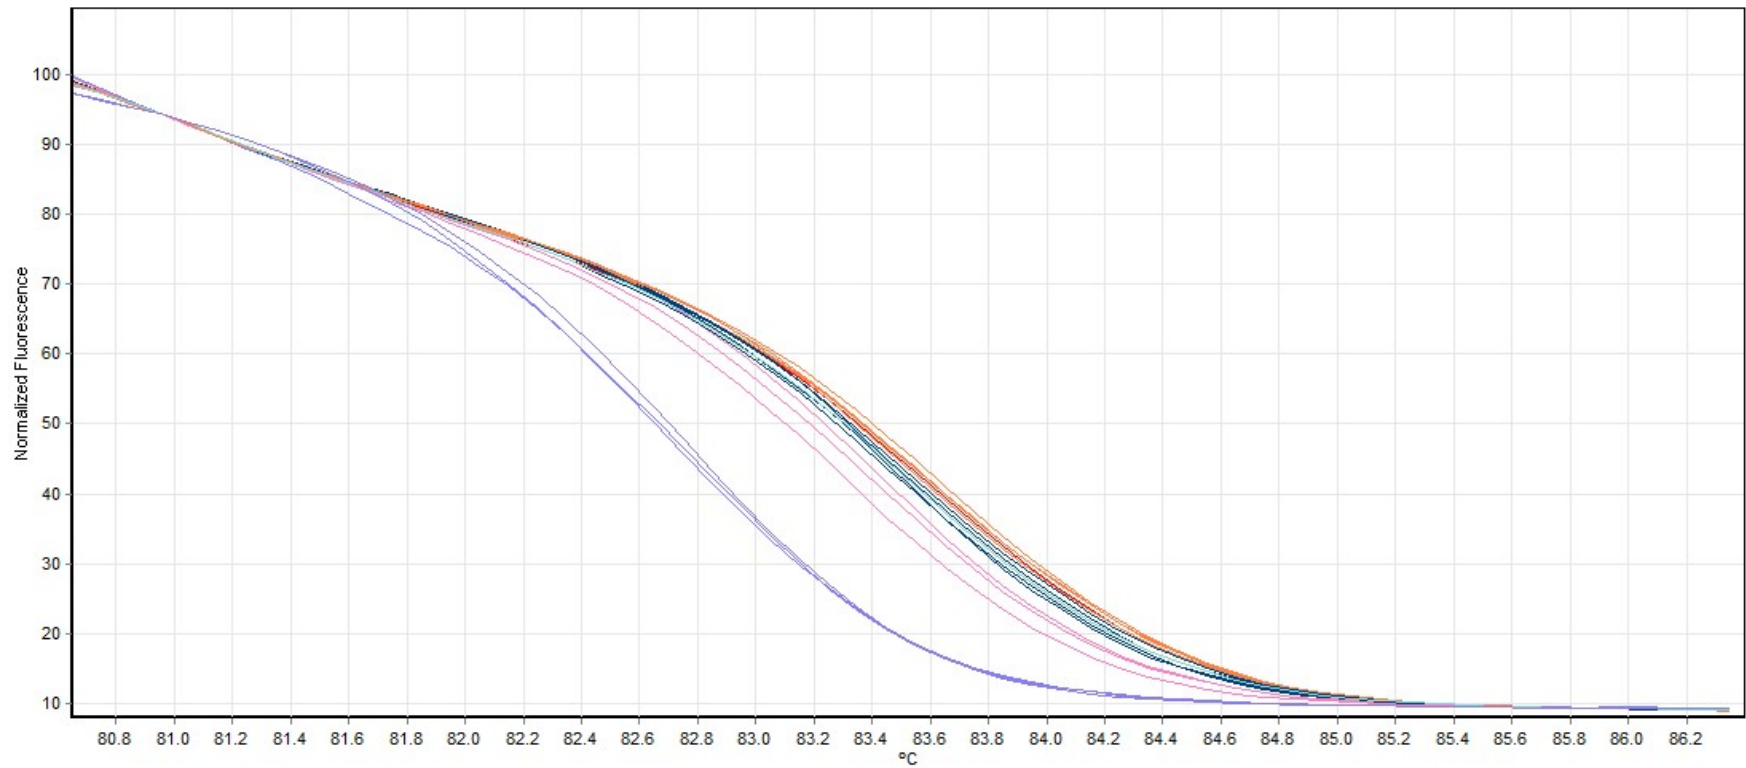

Excel Analysed Data Export  
Copyright (c) 2013 QIAGEN GmbH. All Rights Reserved.  
File panax HRM\_trnL(A).rex

Operator  
Run Id  
Notes  
Machine Serial No 814137



|         |          |
|---------|----------|
| Channel | Gain     |
| Green   | 5        |
| Yellow  | 5        |
| Orange  | 5        |
| Red     | 5        |
| HRM     | -2.66667 |
| Crimson | 7        |

Channel Threshold

HRM A.HRM (Page 1)

Melt analysis of HRM A.HRM (Page 1)

| No. | Color    | Name                     | Genotype | Peak 1 | Peak 2 | Peak 3  | Peak 4  | Peak 5  | Peak 6  | Peak 7  |
|-----|----------|--------------------------|----------|--------|--------|---------|---------|---------|---------|---------|
| 1   | 4227327  | QBG Phytolacca americana |          | 60.85  | 61.48  | 62.22   | 62.77   | 63.45   | 63.92   | 64.48   |
| 2   | 4194432  | QBG Phytolacca japonica  |          | 60.47  | 60.95  | 61.72   | 62.25   | 62.7    | 63.4    | 63.88   |
| 3   | 16711680 | QBG Talinum crassifolium |          | 61.13  | 61.87  | 62.35   | 62.88   | 63.4    | 63.83   | 64.4    |
| 4   | 13491072 | QBG Talinum fruticosum   |          | 60.9   | 61.7   | 62.25   | 63.03   | 63.6    | 64.05   | 64.55   |
| 5   | 12615680 | QBG Talinum paniculatum  |          | 60.43  | 60.88  | 61.65   | 62.1    | 62.55   | 62.85   | 63.33   |
| 6   | 8404992  | QBG Talinum triangulare  |          | 60.57  | 61.07  | 61.28   | 61.7    | 62.32   | 62.6    | 63.05   |
| 7   | 8421376  | Other                    |          | 60.68  | 61.05  | 61.73   | 62.3    | 62.7    | 63.47   | 64.02   |
| 8   | 8421631  | Other                    |          | 60.65  | 61.07  | 61.8    | 62.28   | 62.85   | 63.53   | 63.95   |
| 9   | 1677088  | Other                    |          | 60.25  | 60.77  | 61.05   | 61.52   | 61.97   | 62.27   | 62.82   |
| 10  | 16711935 | Other                    |          | 60.12  | 60.93  | 61.5    | 62.12   | 62.82   | 63.4    | 64.05   |
| 11  | 197379   | Other                    |          | 60.55  | 60.88  | 61.3    | 61.7    | 62.43   | 62.93   | 63.48   |
| 12  | 13158400 | Other                    |          | 60.22  | 60.65  | 61.22   | 61.75   | 62.28   | 62.77   | 63.42   |
| 13  | 8504538  | Talinum triangulare2     |          | 60.65  | 61.08  | 61.55   | 61.95   | 62.25   | 62.77   | 63.17   |
| 14  | 8510085  | Other                    |          | 60.85  | 61.25  | 61.45   | 62.05   | 62.77   | 63.28   | 63.75   |
| 15  | 11893982 | Panax ginseng root dry   |          | 60.92  | 61.25  | 62.2    | 62.85   | 63.35   | 64.05   | 64.58   |
| 16  | 14395776 | Other                    |          | 60.9   | 61.28  | 61.75   | 62.42   | 62.95   | 63.45   | 64.05   |
| 17  | 14450322 | Panax notoginseng        |          | 60.68  | 61.08  | 61.72   | 62.25   | 62.9    | 63.48   | 63.9    |
| 18  | 14515654 | Other                    |          | 60.1   | 60.7   | 61.4    | 61.77   | 62.25   | 62.77   | 63.48   |
| 19  | 11893982 | H2O                      |          | 60.9   | 61.62  | 62.05   | 63.27   | 64.15   | 64.67   | 65.07   |
| No. | Color    | Name                     | Genotype | Peak 8 | Peak 9 | Peak 10 | Peak 11 | Peak 12 | Peak 13 | Peak 14 |

|    |          |                        |                      |       |       |       |       |       |       |       |
|----|----------|------------------------|----------------------|-------|-------|-------|-------|-------|-------|-------|
| 1  | 4227327  | QBG                    | Phytolacca americana | 64.62 | 65.17 | 66    | 66.5  | 66.85 | 67.25 | 67.75 |
| 2  | 4194432  | QBG                    | Phytolacca japonica  | 64.43 | 64.93 | 65.42 | 65.92 | 66.47 | 66.85 | 67.22 |
| 3  | 16711680 | QBG                    | Talinum crassifolium | 64.97 | 65.28 | 65.8  | 66.12 | 66.6  | 66.85 | 67.43 |
| 4  | 13491072 | QBG                    | Talinum fruticosum   | 65.1  | 65.55 | 66.1  | 66.6  | 67.12 | 67.52 | 68    |
| 5  | 12615680 | QBG                    | Talinum paniculatum  | 63.92 | 64.55 | 65.12 | 65.8  | 66.15 | 66.43 | 66.98 |
| 6  | 8404992  | QBG                    | Talinum triangulare  | 63.42 | 63.92 | 64.53 | 65    | 65.27 | 65.77 | 66.4  |
| 7  | 8421376  | Other                  |                      | 64.4  | 64.88 | 65.38 | 65.83 | 66.48 | 66.88 | 67.4  |
| 8  | 8421631  | Other                  |                      | 64.43 | 65.32 | 66.17 | 66.88 | 67.48 | 68.45 | 69.1  |
| 9  | 1677088  | Other                  |                      | 63.22 | 63.65 | 64.1  | 65.17 | 65.6  | 66.15 | 66.67 |
| 10 | 16711935 | Other                  |                      | 64.52 | 64.98 | 65.92 | 67.03 | 67.85 | 68.35 | 68.75 |
| 11 | 197379   | Other                  |                      | 64.03 | 64.35 | 64.98 | 65.47 | 65.8  | 66.5  | 67.15 |
| 12 | 13158400 | Other                  |                      | 63.93 | 64.4  | 64.8  | 65.23 | 65.72 | 66.13 | 66.52 |
| 13 | 8504538  | Talinum triangulare2   |                      | 63.68 | 64.45 | 65.25 | 65.67 | 66.15 | 66.8  | 67.27 |
| 14 | 8510085  | Other                  |                      | 64.18 | 64.63 | 65.08 | 65.68 | 66.1  | 66.6  | 67.05 |
| 15 | 11893982 | Panax ginseng root dry |                      | 65.18 | 65.9  | 66.55 | 66.95 | 67.65 | 68.25 | 68.65 |
| 16 | 14395776 | Other                  |                      | 64.67 | 65.05 | 65.38 | 65.8  | 66.42 | 66.88 | 67.6  |
| 17 | 14450322 | Panax notoginseng      |                      | 64.27 | 65.3  | 65.8  | 66.45 | 67.45 | 67.62 | 68.17 |
| 18 | 14515654 | Other                  |                      | 64.25 | 65.22 | 65.73 | 66.12 | 66.88 | 67.55 | 68.12 |
| 19 | 11893982 | H2O                    |                      | 65.65 | 66.1  | 67.45 | 68.7  | 69.75 | 70.4  | 71.32 |

| No. | Color    | Name                   | Genotype             | Peak 15 | Peak 16 | Peak 17 | Peak 18 | Peak 19 | Peak 20 | Peak 21 |
|-----|----------|------------------------|----------------------|---------|---------|---------|---------|---------|---------|---------|
| 1   | 4227327  | QBG                    | Phytolacca americana | 68.42   | 68.68   | 69.2    | 69.9    | 70.37   | 70.85   | 71.28   |
| 2   | 4194432  | QBG                    | Phytolacca japonica  | 67.77   | 68.68   | 69.08   | 69.77   | 70.27   | 70.95   | 71.45   |
| 3   | 16711680 | QBG                    | Talinum crassifolium | 67.73   | 68.25   | 69.08   | 69.72   | 70.2    | 70.5    | 70.97   |
| 4   | 13491072 | QBG                    | Talinum fruticosum   | 68.38   | 68.85   | 69.2    | 69.75   | 70.43   | 70.85   | 71.3    |
| 5   | 12615680 | QBG                    | Talinum paniculatum  | 67.83   | 68.37   | 68.75   | 69.27   | 69.8    | 70.25   | 70.85   |
| 6   | 8404992  | QBG                    | Talinum triangulare  | 66.92   | 67.65   | 68.32   | 68.75   | 69.38   | 69.9    | 70.35   |
| 7   | 8421376  | Other                  |                      | 67.9    | 68.63   | 69.15   | 69.65   | 70.23   | 70.7    | 71.05   |
| 8   | 8421631  | Other                  |                      | 69.63   | 70.22   | 71.1    | 71.72   | 72.15   | 72.77   | 73.05   |
| 9   | 1677088  | Other                  |                      | 67.25   | 67.6    | 67.95   | 68.35   | 68.73   | 69.1    | 69.65   |
| 10  | 16711935 | Other                  |                      | 69.32   | 69.98   | 70.38   | 71.07   | 71.42   | 71.85   | 72.25   |
| 11  | 197379   | Other                  |                      | 67.8    | 68.32   | 68.7    | 69.25   | 69.7    | 70.23   | 71.1    |
| 12  | 13158400 | Other                  |                      | 66.95   | 67.4    | 67.78   | 68.47   | 68.93   | 69.2    | 69.77   |
| 13  | 8504538  | Talinum triangulare2   |                      | 67.75   | 68.4    | 69.15   | 69.75   | 70.25   | 70.95   | 71.85   |
| 14  | 8510085  | Other                  |                      | 67.97   | 68.33   | 68.75   | 69.3    | 69.7    | 70.35   | 70.8    |
| 15  | 11893982 | Panax ginseng root dry |                      | 69.33   | 70.02   | 70.4    | 70.93   | 71.43   | 71.95   | 72.22   |
| 16  | 14395776 | Other                  |                      | 67.88   | 68.67   | 69.27   | 70.02   | 70.47   | 70.95   | 71.2    |

| 17  | 14450322 | Panax notoginseng        |          | 68.55   | 69.03   | 69.22   | 69.65   | 70.42   | 70.95   | 71.55   |
|-----|----------|--------------------------|----------|---------|---------|---------|---------|---------|---------|---------|
| 18  | 14515654 | Other                    |          | 68.55   | 69.13   | 69.57   | 70.13   | 70.42   | 70.85   | 71.25   |
| 19  | 11893982 | H2O                      |          | 72.1    | 72.58   | 73.52   | 74.52   | 75.32   | 75.78   | 77.05   |
| No. | Color    | Name                     | Genotype | Peak 22 | Peak 23 | Peak 24 | Peak 25 | Peak 26 | Peak 27 | Peak 28 |
| 1   | 4227327  | QBG Phytolacca americana |          | 71.77   | 72.28   | 73      | 73.35   | 73.8    | 74.25   | 74.93   |
| 2   | 4194432  | QBG Phytolacca japonica  |          | 71.8    | 72.35   | 72.73   | 73.25   | 73.65   | 74.25   | 74.98   |
| 3   | 16711680 | QBG Talinum crassifolium |          | 71.8    | 72.32   | 72.78   | 73.45   | 73.75   | 74.23   | 74.8    |
| 4   | 13491072 | QBG Talinum fruticosum   |          | 71.8    | 72.17   | 72.92   | 73.67   | 74.17   | 74.52   | 75      |
| 5   | 12615680 | QBG Talinum paniculatum  |          | 71.35   | 71.85   | 72.2    | 72.58   | 72.93   | 73.52   | 74.05   |
| 6   | 8404992  | QBG Talinum triangulare  |          | 71      | 71.47   | 71.9    | 72.37   | 73.03   | 73.6    | 74.25   |
| 7   | 8421376  | Other                    |          | 71.5    | 71.9    | 72.37   | 72.7    | 73.45   | 74.25   | 75.05   |
| 8   | 8421631  | Other                    |          | 73.77   | 74.22   | 74.75   | 75.42   | 75.65   | 76.07   | 76.4    |
| 9   | 1677088  | Other                    |          | 70.13   | 70.4    | 70.85   | 71.2    | 71.63   | 72.2    | 72.9    |
| 10  | 16711935 | Other                    |          | 72.48   | 72.93   | 73.4    | 74.13   | 74.55   | 75.75   | 76.2    |
| 11  | 197379   | Other                    |          | 71.75   | 72.75   | 73.2    | 74.13   | 74.92   | 75.73   | 76.22   |
| 12  | 13158400 | Other                    |          | 70.22   | 70.68   | 71      | 71.5    | 71.93   | 72.65   | 73      |
| 13  | 8504538  | Talinum triangulare2     |          | 72.25   | 72.85   | 73.27   | 73.8    | 74.2    | 74.75   | 75.37   |
| 14  | 8510085  | Other                    |          | 71.35   | 71.85   | 72.23   | 72.87   | 73.55   | 74.18   | 74.75   |
| 15  | 11893982 | Panax ginseng root dry   |          | 72.7    | 73.47   | 73.93   | 74.33   | 74.72   | 75.48   | 75.85   |
| 16  | 14395776 | Other                    |          | 71.77   | 71.92   | 72.33   | 72.98   | 73.82   | 74.05   | 74.77   |
| 17  | 14450322 | Panax notoginseng        |          | 71.8    | 72.37   | 73.05   | 73.55   | 74.2    | 74.8    | 75.55   |
| 18  | 14515654 | Other                    |          | 71.72   | 72.22   | 72.9    | 73.32   | 73.72   | 74.25   | 74.78   |
| 19  | 11893982 | H2O                      |          | 77.85   | 78.38   | 78.87   | 79.62   | 80.25   | 80.8    | 81.22   |
| No. | Color    | Name                     | Genotype | Peak 29 | Peak 30 | Peak 31 | Peak 32 | Peak 33 | Peak 34 | Peak 35 |
| 1   | 4227327  | QBG Phytolacca americana |          | 75.45   | 75.75   | 76.27   | 76.8    | 77.4    | 77.7    | 78.2    |
| 2   | 4194432  | QBG Phytolacca japonica  |          | 75.53   | 76.13   | 76.82   | 77.25   | 77.73   | 78.33   | 79.3    |
| 3   | 16711680 | QBG Talinum crassifolium |          | 75.03   | 75.5    | 76.02   | 76.67   | 77.35   | 77.7    | 78.25   |
| 4   | 13491072 | QBG Talinum fruticosum   |          | 75.4    | 75.75   | 76.32   | 76.95   | 77.37   | 77.85   | 78.35   |
| 5   | 12615680 | QBG Talinum paniculatum  |          | 74.5    | 75.7    | 76.25   | 77      | 77.52   | 78.07   | 80.4    |
| 6   | 8404992  | QBG Talinum triangulare  |          | 74.68   | 75.1    | 75.45   | 75.92   | 76.25   | 76.75   | 77.17   |
| 7   | 8421376  | Other                    |          | 75.55   | 76.17   | 76.75   | 77.63   | 80.85   | 83.55   | 84.27   |
| 8   | 8421631  | Other                    |          | 76.7    | 77.2    | 77.7    | 78.25   | 78.73   | 81.15   | 84.37   |
| 9   | 1677088  | Other                    |          | 73.65   | 74.25   | 74.5    | 74.85   | 75.35   | 75.92   | 76.35   |
| 10  | 16711935 | Other                    |          | 76.65   | 77.23   | 78      | 80.27   | 82.05   | 84.15   | 84.85   |
| 11  | 197379   | Other                    |          | 76.8    | 77.73   | 80.3    | 81.95   | 83.87   | 84.75   | 85.35   |
| 12  | 13158400 | Other                    |          | 73.6    | 74.13   | 75.1    | 75.53   | 76.1    | 76.9    | 77.28   |



|    |          |                        |       |       |       |       |       |       |       |
|----|----------|------------------------|-------|-------|-------|-------|-------|-------|-------|
| 9  | 1677088  | Other                  | 85.75 | 86.3  | 86.97 | 87.6  | 88.15 | 88.8  | 89.1  |
| 10 | 16711935 | Other                  | 88.2  | 88.65 | 89.32 |       |       |       |       |
| 11 | 197379   | Other                  |       |       |       |       |       |       |       |
| 12 | 13158400 | Other                  | 86.05 | 86.45 | 86.75 | 87.25 | 87.73 | 88.5  | 89.05 |
| 13 | 8504538  | Talinum triangulare2   |       |       |       |       |       |       |       |
| 14 | 8510085  | Other                  | 86.18 | 86.7  | 87.7  | 88.25 | 88.83 | 89.58 |       |
| 15 | 11893982 | Panax ginseng root dry |       |       |       |       |       |       |       |
| 16 | 14395776 | Other                  | 86.42 | 86.85 | 87.18 | 87.9  | 88.45 | 89.23 | 89.77 |
| 17 | 14450322 | Panax notoginseng      |       |       |       |       |       |       |       |
| 18 | 14515654 | Other                  | 87.6  | 87.85 | 88.35 | 88.95 | 89.5  |       |       |
| 19 | 11893982 | H2O                    |       |       |       |       |       |       |       |

| No. | Color    | Name                     | Genotype | Peak 50 | Peak 51 |
|-----|----------|--------------------------|----------|---------|---------|
| 1   | 4227327  | QBG Phytolacca americana |          |         |         |
| 2   | 4194432  | QBG Phytolacca japonica  |          |         |         |
| 3   | 16711680 | QBG Talinum crassifolium |          |         |         |
| 4   | 13491072 | QBG Talinum fruticosum   |          |         |         |
| 5   | 12615680 | QBG Talinum paniculatum  |          |         |         |
| 6   | 8404992  | QBG Talinum triangulare  |          | 89.2    | 89.85   |
| 7   | 8421376  | Other                    |          |         |         |
| 8   | 8421631  | Other                    |          |         |         |
| 9   | 1677088  | Other                    |          | 89.55   |         |
| 10  | 16711935 | Other                    |          |         |         |
| 11  | 197379   | Other                    |          |         |         |
| 12  | 13158400 | Other                    |          | 89.63   |         |
| 13  | 8504538  | Talinum triangulare2     |          |         |         |
| 14  | 8510085  | Other                    |          |         |         |
| 15  | 11893982 | Panax ginseng root dry   |          |         |         |
| 16  | 14395776 | Other                    |          |         |         |
| 17  | 14450322 | Panax notoginseng        |          |         |         |
| 18  | 14515654 | Other                    |          |         |         |
| 19  | 11893982 | H2O                      |          |         |         |

trnL(1)

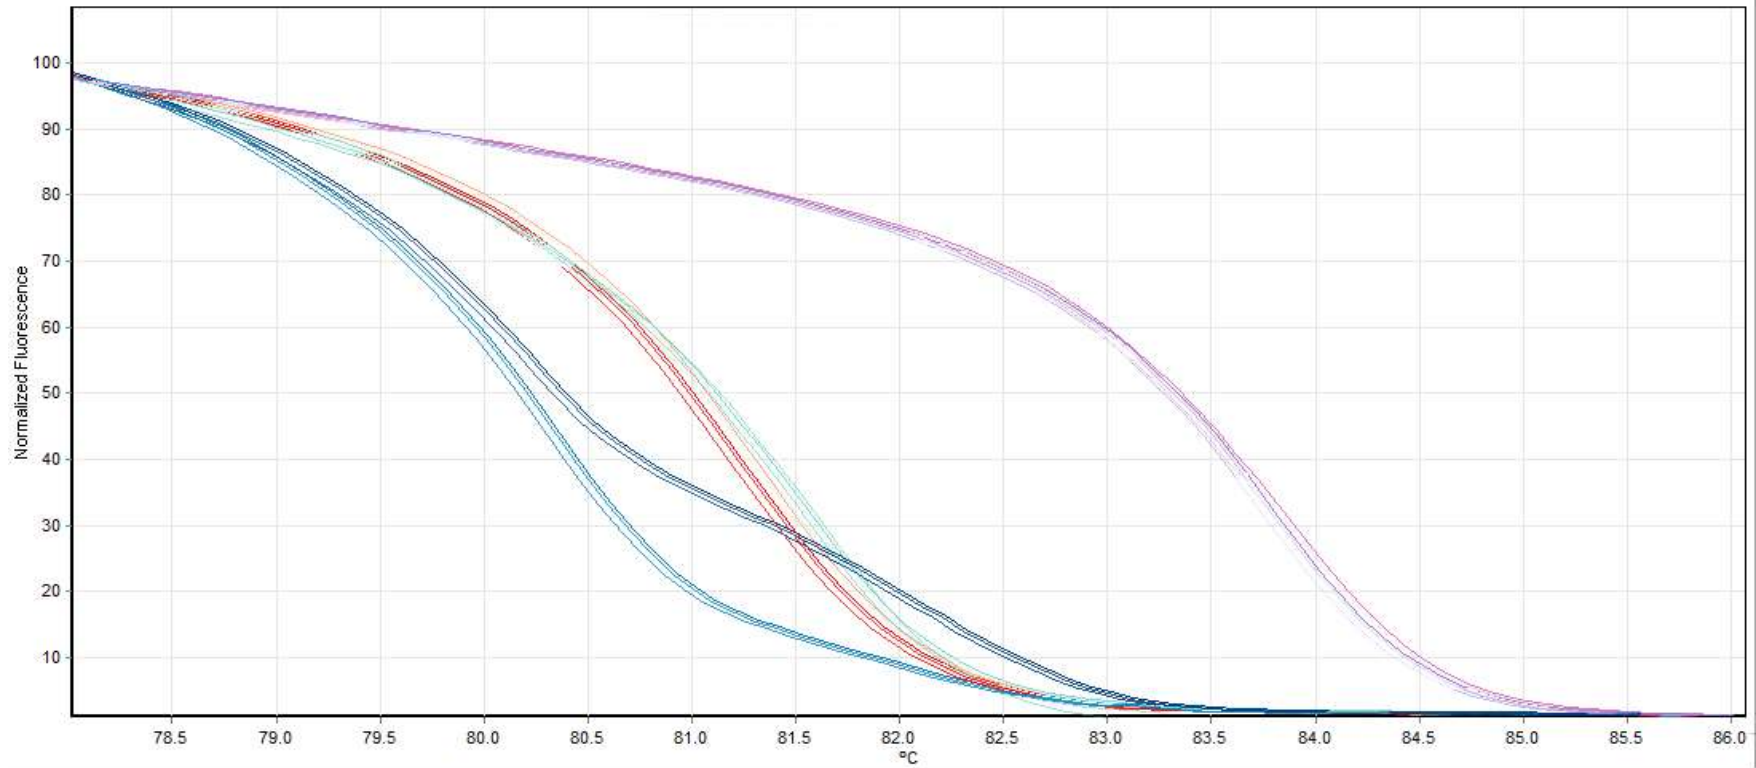

Excel Analysed Data Export

Copyright (c) 2013 QIAGEN GmbH. All Rights Reserved.

File panax HRM\_trnL(B).rex

Operator

Run Id

Notes

Machine Serial No 814137

Channel Gain

Green 5

Yellow 5  
 Orange 5  
 Red 5  
 HRM -2.66667  
 Crimson 7

Channel Threshold

Cycling A.Green (Page 1)  
 HRM A.HRM (Page 0.07489)

Melt analysis of HRM A.HRM (Page 1)

| No. | Color        | Name                   | Genotype | Peak 1 | Peak 2 | Peak 3 | Peak 4 | Peak 5 | Peak 6 | Peak 7 |
|-----|--------------|------------------------|----------|--------|--------|--------|--------|--------|--------|--------|
| 1   | 255 QBG      | Phytolacca americana   |          | 60.74  | 61.31  | 62.1   | 62.82  | 63.27  | 63.81  | 64.5   |
| 2   | 51400 QBG    | Phytolacca japonica    |          | 60.39  | 60.75  | 61.64  | 62.09  | 62.62  | 63.28  | 63.69  |
| 3   | 16711680 QBG | Talinum crassifolium   |          | 61.28  | 61.6   | 62.19  | 62.91  | 63.29  | 63.74  | 64.28  |
| 4   | 8388736 QBG  | Talinum fruticosum     |          | 60.84  | 61.54  | 62.36  | 63.14  | 63.72  | 64.11  | 64.62  |
| 5   | 16744703 QBG | Talinum paniculatum    |          | 60.39  | 60.92  | 61.47  | 62.01  | 62.49  | 62.77  | 63.18  |
| 6   | 16744448 QBG | Talinum triangulare    |          | 60.67  | 61.18  | 61.22  | 61.65  | 62.27  | 62.57  | 63.14  |
| 7   | 8421376      | Other                  |          | 60.71  | 61.01  | 61.87  | 62.47  | 62.86  | 63.42  | 64.07  |
| 8   | 8421631      | Other                  |          | 60.62  | 61.14  | 61.91  | 62.31  | 62.91  | 63.47  | 63.92  |
| 9   | 1677088      | Other                  |          | 60.34  | 60.71  | 61.12  | 61.66  | 62     | 62.34  | 62.91  |
| 10  | 16711935     | Other                  |          | 60.31  | 60.87  | 61.41  | 62.03  | 62.93  | 63.31  | 63.97  |
| 11  | 197379       | Other                  |          | 60.47  | 60.92  | 61.28  | 61.87  | 62.31  | 62.84  | 63.27  |
| 12  | 13158400     | Other                  |          | 60.17  | 60.77  | 61.45  | 61.82  | 62.14  | 62.81  | 63.35  |
| 13  | 8504538      | Talinum triangulare2   |          | 60.72  | 61.14  | 61.39  | 61.88  | 62.28  | 62.69  | 63.07  |
| 14  | 8510085      | Other                  |          | 60.92  | 61.18  | 61.57  | 62.14  | 62.69  | 63.41  | 63.82  |
| 15  | 13491072     | Panax ginseng root dry |          | 60.97  | 61.32  | 62.11  | 62.92  | 63.47  | 64.12  | 64.36  |
| 16  | 14395776     | Other                  |          | 60.84  | 61.17  | 61.82  | 62.3   | 62.83  | 63.28  | 64.13  |
| 17  | 14450322     | Panax notoginseng      |          | 60.7   | 61.1   | 61.69  | 62.14  | 62.79  | 63.29  | 63.83  |
| 18  | 14515654     | Other                  |          | 60.25  | 60.69  | 61.28  | 61.82  | 62.15  | 62.81  | 63.52  |
| 19  | 11893982     | dH2O                   |          |        |        |        |        |        |        |        |
| 20  | 174          | dH2O                   |          |        |        |        |        |        |        |        |

| No. | Color   | Name                 | Genotype | Peak 8 | Peak 9 | Peak 10 | Peak 11 | Peak 12 | Peak 13 | Peak 14 |
|-----|---------|----------------------|----------|--------|--------|---------|---------|---------|---------|---------|
| 1   | 255 QBG | Phytolacca americana |          | 64.81  | 65.29  | 66.08   | 66.61   | 66.92   | 67.34   | 67.81   |

|    |          |       |                        |       |       |       |       |       |       |       |
|----|----------|-------|------------------------|-------|-------|-------|-------|-------|-------|-------|
| 2  | 51400    | QBG   | Phytolacca japonica    | 64.29 | 65    | 65.48 | 65.87 | 66.31 | 66.92 | 67.13 |
| 3  | 16711680 | QBG   | Talinum crassifolium   | 64.89 | 65.22 | 65.91 | 66.23 | 66.74 | 66.89 | 67.25 |
| 4  | 8388736  | QBG   | Talinum fruticosum     | 65.09 | 65.62 | 66.09 | 66.48 | 67.19 | 67.38 | 68.01 |
| 5  | 16744703 | QBG   | Talinum paniculatum    | 63.79 | 64.61 | 65.08 | 65.77 | 66.28 | 66.49 | 67.1  |
| 6  | 16744448 | QBG   | Talinum triangulare    | 63.58 | 63.97 | 64.42 | 65.05 | 65.19 | 65.98 | 66.31 |
| 7  | 8421376  | Other |                        | 64.52 | 64.91 | 65.35 | 65.92 | 66.52 | 66.9  | 67.37 |
| 8  | 8421631  | Other |                        | 64.27 | 65.45 | 66.28 | 66.93 | 67.52 | 68.6  | 69.22 |
| 9  | 1677088  | Other |                        | 63.18 | 63.75 | 64.22 | 65.38 | 65.76 | 66.07 | 66.74 |
| 10 | 16711935 | Other |                        | 64.47 | 65.1  | 65.87 | 67.01 | 67.74 | 68.27 | 68.83 |
| 11 | 197379   | Other |                        | 64.11 | 64.47 | 65.02 | 65.42 | 65.76 | 66.39 | 67.09 |
| 12 | 13158400 | Other |                        | 63.85 | 64.35 | 64.92 | 65.14 | 65.83 | 66.07 | 66.47 |
| 13 | 8504538  |       | Talinum triangulare2   | 63.54 | 64.52 | 65.18 | 65.56 | 66.09 | 66.88 | 67.18 |
| 14 | 8510085  | Other |                        | 64.1  | 64.78 | 65.24 | 65.55 | 66.07 | 66.74 | 67.1  |
| 15 | 13491072 |       | Panax ginseng root dry | 65.22 | 66    | 66.67 | 66.9  | 67.49 | 68.36 | 68.74 |
| 16 | 14395776 | Other |                        | 64.57 | 65.17 | 65.42 | 65.78 | 66.37 | 66.92 | 67.53 |
| 17 | 14450322 |       | Panax notoginseng      | 64.31 | 65.23 | 65.77 | 66.61 | 67.31 | 67.67 | 68.09 |
| 18 | 14515654 | Other |                        | 64.13 | 65.09 | 65.64 | 66.24 | 66.75 | 67.48 | 68.2  |
| 19 | 11893982 |       | dH2O                   |       |       |       |       |       |       |       |
| 20 | 174      |       | dH2O                   |       |       |       |       |       |       |       |

| No. | Color    | Name  | Genotype               | Peak 15 | Peak 16 | Peak 17 | Peak 18 | Peak 19 | Peak 20 | Peak 21 |
|-----|----------|-------|------------------------|---------|---------|---------|---------|---------|---------|---------|
| 1   | 255      | QBG   | Phytolacca americana   | 68.27   | 68.59   | 69.27   | 69.87   | 70.21   | 70.76   | 71.33   |
| 2   | 51400    | QBG   | Phytolacca japonica    | 67.98   | 68.42   | 69.1    | 69.64   | 70.18   | 70.9    | 71.44   |
| 3   | 16711680 | QBG   | Talinum crassifolium   | 67.84   | 68.17   | 69.13   | 69.89   | 70.31   | 70.64   | 70.96   |
| 4   | 8388736  | QBG   | Talinum fruticosum     | 68.42   | 68.79   | 69.32   | 69.81   | 70.26   | 70.77   | 71.19   |
| 5   | 16744703 | QBG   | Talinum paniculatum    | 67.92   | 68.29   | 68.81   | 69.16   | 69.74   | 70.09   | 70.72   |
| 6   | 16744448 | QBG   | Talinum triangulare    | 66.79   | 67.52   | 68.29   | 68.81   | 69.28   | 69.88   | 70.4    |
| 7   | 8421376  | Other |                        | 67.93   | 68.75   | 69.08   | 69.74   | 70.1    | 70.88   | 71.17   |
| 8   | 8421631  | Other |                        | 69.71   | 70.28   | 71.07   | 71.82   | 72.09   | 72.61   | 73.14   |
| 9   | 1677088  | Other |                        | 67.32   | 67.81   | 67.99   | 68.37   | 68.84   | 69.17   | 69.7    |
| 10  | 16711935 | Other |                        | 69.24   | 69.89   | 70.41   | 71.12   | 71.5    | 71.97   | 72.17   |
| 11  | 197379   | Other |                        | 67.79   | 68.3    | 68.89   | 69.33   | 69.82   | 70.14   | 71.09   |
| 12  | 13158400 | Other |                        | 66.8    | 67.22   | 67.69   | 68.39   | 68.88   | 69.35   | 69.84   |
| 13  | 8504538  |       | Talinum triangulare2   | 67.66   | 68.36   | 69.2    | 69.87   | 70.31   | 71      | 71.77   |
| 14  | 8510085  | Other |                        | 67.86   | 68.28   | 68.81   | 69.22   | 69.81   | 70.45   | 70.82   |
| 15  | 13491072 |       | Panax ginseng root dry | 69.34   | 70.1    | 70.52   | 70.77   | 71.28   | 71.9    | 72.17   |
| 16  | 14395776 | Other |                        | 67.72   | 68.55   | 69.34   | 70      | 70.25   | 70.67   | 71.05   |



|    |          |                   |       |       |       |       |       |       |       |
|----|----------|-------------------|-------|-------|-------|-------|-------|-------|-------|
| 17 | 14450322 | Panax notoginseng | 68.41 | 69    | 69.38 | 69.75 | 70.25 | 70.73 | 71.45 |
| 18 | 14515654 | Other             | 68.63 | 69.05 | 69.61 | 70.06 | 70.35 | 70.97 | 71.52 |
| 19 | 11893982 | dH2O              |       |       |       |       |       |       |       |
| 20 | 174      | dH2O              |       |       |       |       |       |       |       |

| No. | Color    | Name                     | Genotype | Peak 22 | Peak 23 | Peak 24 | Peak 25 | Peak 26 | Peak 27 | Peak 28 |
|-----|----------|--------------------------|----------|---------|---------|---------|---------|---------|---------|---------|
| 1   | 255      | QBG Phytolacca americana |          | 71.74   | 72.3    | 73.04   | 73.4    | 73.77   | 74.31   | 74.9    |
| 2   | 51400    | QBG Phytolacca japonica  |          | 71.9    | 72.3    | 72.69   | 73.25   | 73.71   | 74.25   | 74.95   |
| 3   | 16711680 | QBG Talinum crassifolium |          | 71.74   | 72.27   | 72.87   | 73.37   | 73.8    | 74.25   | 74.83   |
| 4   | 8388736  | QBG Talinum fruticosum   |          | 71.69   | 72.11   | 72.98   | 73.52   | 75.74   | 76.42   | 76.89   |
| 5   | 16744703 | QBG Talinum paniculatum  |          | 71.28   | 71.69   | 72.09   | 72.41   | 72.99   | 73.47   | 74.11   |
| 6   | 16744448 | QBG Talinum triangulare  |          | 71.02   | 71.57   | 71.77   | 72.44   | 73.08   | 73.66   | 74.19   |
| 7   | 8421376  | Other                    |          | 71.61   | 71.86   | 72.4    | 72.82   | 73.53   | 74.21   | 75.09   |
| 8   | 8421631  | Other                    |          | 73.82   | 74.27   | 74.69   | 75.3    | 75.71   | 76.15   | 76.37   |
| 9   | 1677088  | Other                    |          | 70.24   | 70.56   | 70.96   | 71.12   | 71.55   | 72.11   | 72.92   |
| 10  | 16711935 | Other                    |          | 72.56   | 72.89   | 73.29   | 74.07   | 74.62   | 75.62   | 76.18   |
| 11  | 197379   | Other                    |          | 71.64   | 72.7    | 73.2    | 74.09   | 74.9    | 75.7    | 76.37   |
| 12  | 13158400 | Other                    |          | 70.09   | 70.78   | 71.04   | 71.62   | 72.01   | 72.74   | 73.11   |
| 13  | 8504538  | Talinum triangulare2     |          | 72.24   | 72.91   | 73.36   | 73.79   | 74.31   | 74.67   | 75.28   |
| 14  | 8510085  | Other                    |          | 71.47   | 71.91   | 72.28   | 72.9    | 73.61   | 74.27   | 74.67   |
| 15  | 13491072 | Panax ginseng root dry   |          | 72.59   | 73.41   | 73.89   | 74.25   | 74.67   | 75.31   | 75.81   |
| 16  | 14395776 | Other                    |          | 71.82   | 71.84   | 72.28   | 72.88   | 73.91   | 74.22   | 74.69   |
| 17  | 14450322 | Panax notoginseng        |          | 71.78   | 72.4    | 73.11   | 73.46   | 74.28   | 74.67   | 75.53   |
| 18  | 14515654 | Other                    |          | 71.91   | 72.31   | 72.81   | 73.41   | 73.69   | 74.31   | 74.82   |
| 19  | 11893982 | dH2O                     |          |         |         |         |         |         |         |         |
| 20  | 174      | dH2O                     |          |         |         |         |         |         |         |         |

| No. | Color    | Name                     | Genotype | Peak 29 | Peak 30 | Peak 31 | Peak 32 | Peak 33 | Peak 34 | Peak 35 |
|-----|----------|--------------------------|----------|---------|---------|---------|---------|---------|---------|---------|
| 1   | 255      | QBG Phytolacca americana |          | 75.51   | 75.84   | 76.09   | 76.72   | 77.33   | 77.68   | 78.22   |
| 2   | 51400    | QBG Phytolacca japonica  |          | 75.5    | 76.2    | 76.91   | 77.34   | 77.78   | 78.41   | 79.28   |
| 3   | 16711680 | QBG Talinum crassifolium |          | 75.01   | 75.49   | 76.09   | 76.58   | 77.42   | 77.67   | 78.3    |
| 4   | 8388736  | QBG Talinum fruticosum   |          | 78.66   | 79.19   | 81.75   |         |         |         |         |
| 5   | 16744703 | QBG Talinum paniculatum  |          | 74.48   | 75.63   | 76.35   | 77.03   | 77.48   | 78.1    | 80.37   |
| 6   | 16744448 | QBG Talinum triangulare  |          | 74.73   | 75.17   | 75.51   | 75.9    | 76.21   | 76.64   | 77.11   |
| 7   | 8421376  | Other                    |          | 75.62   | 76.24   | 76.8    | 77.57   | 80.72   |         |         |
| 8   | 8421631  | Other                    |          | 76.81   | 77.15   | 77.68   | 78.22   | 78.7    | 81.2    |         |
| 9   | 1677088  | Other                    |          | 73.59   | 74.36   | 74.61   | 74.91   | 75.41   | 75.9    | 76.29   |
| 10  | 16711935 | Other                    |          | 76.61   | 77.22   | 78.07   | 80.3    | 82      |         |         |

|    |          |                        |       |       |       |       |       |       |       |
|----|----------|------------------------|-------|-------|-------|-------|-------|-------|-------|
| 11 | 197379   | Other                  | 76.74 | 77.61 | 80.29 | 81.88 |       |       |       |
| 12 | 13158400 | Other                  | 73.63 | 74.22 | 75.12 | 75.64 | 76.19 | 76.81 | 77.17 |
| 13 | 8504538  | Talinum triangulare2   | 76.17 | 76.81 | 77.07 | 77.92 | 80.5  | 82.28 |       |
| 14 | 8510085  | Other                  | 75.34 | 75.67 | 76.17 | 77.11 | 77.44 | 77.96 | 78.5  |
| 15 | 13491072 | Panax ginseng root dry | 76.77 | 77.24 | 77.74 | 78.04 | 78.37 | 78.9  | 79.28 |
| 16 | 14395776 | Other                  | 75.14 | 75.6  | 76.12 | 76.8  | 77.31 | 77.68 | 78.05 |
| 17 | 14450322 | Panax notoginseng      | 76.05 | 76.61 | 77.09 | 77.82 | 78.18 | 78.71 | 79.5  |
| 18 | 14515654 | Other                  | 75.24 | 75.65 | 76.36 | 76.91 | 77.61 | 78.33 | 79.18 |
| 19 | 11893982 | dH2O                   |       |       |       |       |       |       |       |
| 20 | 174      | dH2O                   |       |       |       |       |       |       |       |

| No. | Color    | Name                     | Genotype | Peak 36 | Peak 37 | Peak 38 | Peak 39 | Peak 40 | Peak 41 |
|-----|----------|--------------------------|----------|---------|---------|---------|---------|---------|---------|
| 1   | 255      | QBG Phytolacca americana |          | 78.74   | 81.4    |         |         |         |         |
| 2   | 51400    | QBG Phytolacca japonica  |          | 81.17   |         |         |         |         |         |
| 3   | 16711680 | QBG Talinum crassifolium |          | 80.55   | 82.41   |         |         |         |         |
| 4   | 8388736  | QBG Talinum fruticosum   |          |         |         |         |         |         |         |
| 5   | 16744703 | QBG Talinum paniculatum  |          | 82.08   |         |         |         |         |         |
| 6   | 16744448 | QBG Talinum triangulare  |          | 77.56   | 80.33   | 82.32   |         |         |         |
| 7   | 8421376  | Other                    |          |         |         |         |         |         |         |
| 8   | 8421631  | Other                    |          |         |         |         |         |         |         |
| 9   | 1677088  | Other                    |          | 77.12   | 77.89   | 80.47   | 82.1    |         |         |
| 10  | 16711935 | Other                    |          |         |         |         |         |         |         |
| 11  | 197379   | Other                    |          |         |         |         |         |         |         |
| 12  | 13158400 | Other                    |          | 77.9    | 80.3    | 82.44   |         |         |         |
| 13  | 8504538  | Talinum triangulare2     |          |         |         |         |         |         |         |
| 14  | 8510085  | Other                    |          | 80.41   | 82.23   | 82.39   |         |         |         |
| 15  | 13491072 | Panax ginseng root dry   |          | 79.79   | 80.44   | 80.72   | 81.29   | 81.61   | 83.92   |
| 16  | 14395776 | Other                    |          | 79.2    | 79.51   | 79.89   | 80.4    | 81.27   | 83.59   |
| 17  | 14450322 | Panax notoginseng        |          | 80.08   | 80.65   | 83.84   |         |         |         |
| 18  | 14515654 | Other                    |          | 81.1    | 82.57   |         |         |         |         |
| 19  | 11893982 | dH2O                     |          |         |         |         |         |         |         |
| 20  | 174      | dH2O                     |          |         |         |         |         |         |         |

trnL(2)

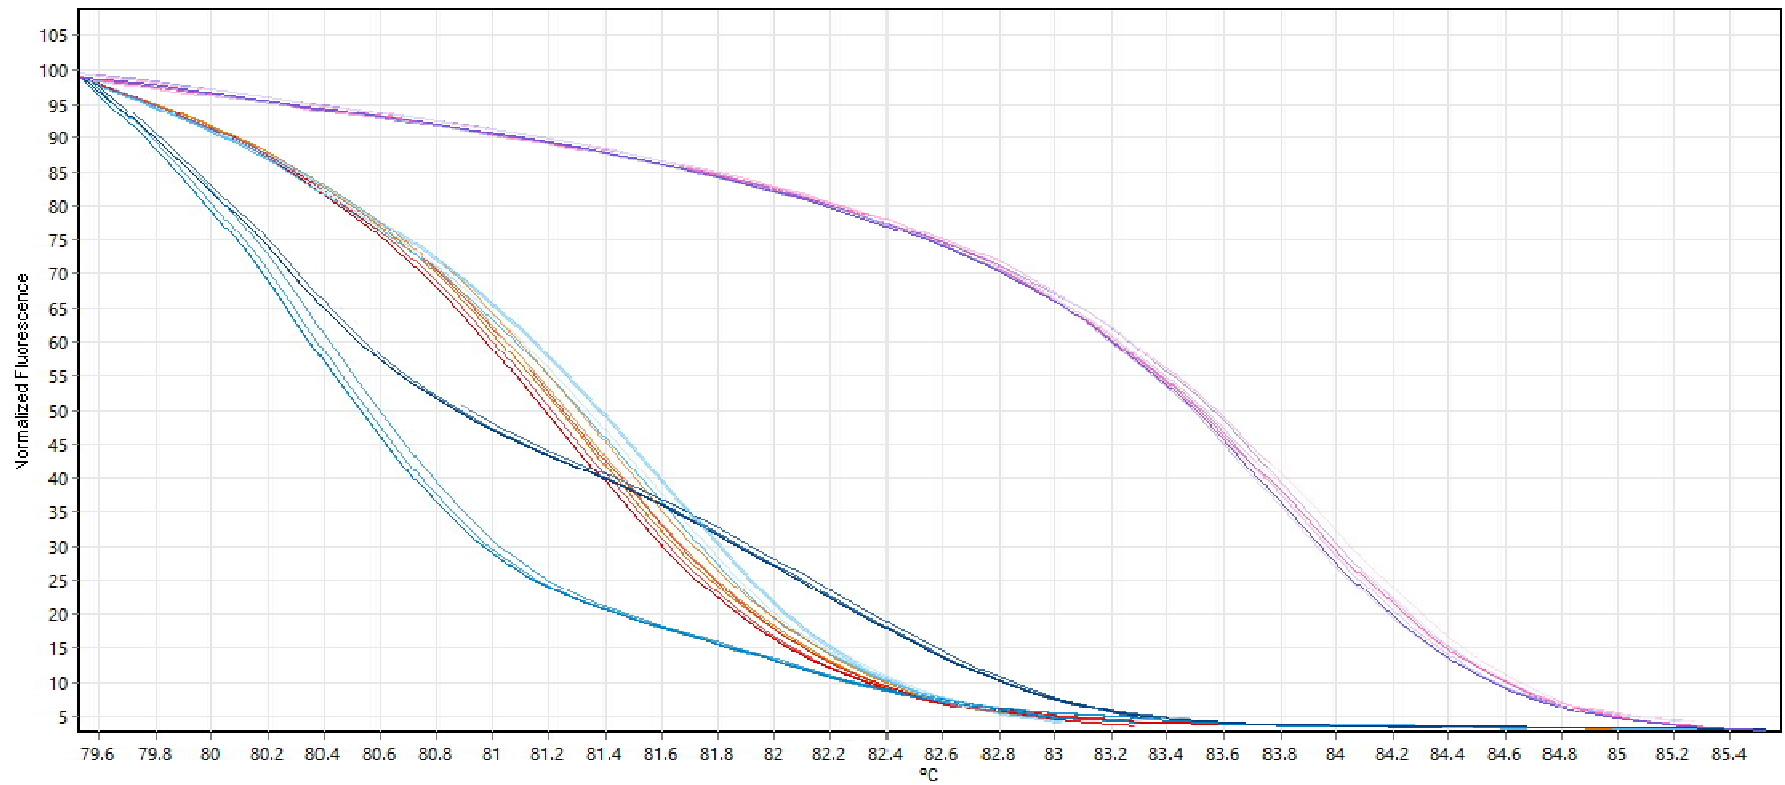

Excel Analysed Data Export

Copyright (c) 2013 QIAGEN GmbH. All Rights Reserved.

File panax HRM\_trnL(C).rex

Operator

Run Id

Notes

Machine Serial No 814137

Channel

Gain

Green 5  
 Yellow 5  
 Orange 5  
 Red 5  
 HRM -2.66667  
 Crimson 7

Channel Threshold

Cycling A.Green (Page 1)

HRM A.HRM (Page 0.12307)

Melt analysis of HRM A.HRM (Page 1)

| No. | Color    | Name                     | Genotype | Peak 1 | Peak 2 | Peak 3 | Peak 4 | Peak 5 | Peak 6 | Peak 7 |
|-----|----------|--------------------------|----------|--------|--------|--------|--------|--------|--------|--------|
| 1   | 255      | QBG Phytolacca americana |          | 60.8   | 61.44  | 62.29  | 62.76  | 63.39  | 63.9   | 64.41  |
| 2   | 51400    | QBG Phytolacca japonica  |          | 60.41  | 60.87  | 61.77  | 62.21  | 62.63  | 63.44  | 63.92  |
| 3   | 16711680 | QBG Talinum crassifolium |          | 61.07  | 61.69  | 62.28  | 62.74  | 63.47  | 63.78  | 64.38  |
| 4   | 8388736  | QBG Talinum fruticosum   |          | 60.92  | 61.72  | 62.21  | 63     | 63.64  | 64.07  | 65.17  |
| 5   | 16744703 | QBG Talinum paniculatum  |          | 60.4   | 60.85  | 61.63  | 62.19  | 62.62  | 62.91  | 63.41  |
| 6   | 16744448 | QBG Talinum triangulare  |          | 60.66  | 61.14  | 61.37  | 61.74  | 62.35  | 62.72  | 63.09  |
| 7   | 8421376  | Other                    |          | 60.61  | 61.08  | 61.68  | 62.27  | 62.77  | 63.5   | 64.08  |
| 8   | 8421631  | Other                    |          | 60.62  | 61.05  | 61.84  | 62.26  | 62.8   | 63.58  | 63.89  |
| 9   | 1677088  | Other                    |          | 60.17  | 60.79  | 61.11  | 61.59  | 61.89  | 62.22  | 62.87  |
| 10  | 16711935 | Other                    |          | 60.22  | 60.9   | 61.43  | 62.2   | 62.81  | 63.31  | 64.01  |
| 11  | 197379   | Other                    |          | 60.48  | 60.75  | 61.32  | 61.74  | 62.44  | 62.91  | 63.42  |
| 12  | 13158400 | Other                    |          | 60.27  | 60.66  | 61.2   | 61.82  | 62.32  | 62.7   | 63.36  |
| 13  | 8504538  | Talinum triangulare2     |          | 60.68  | 61.16  | 61.59  | 61.97  | 62.21  | 62.72  | 63.19  |
| 14  | 8510085  | Other                    |          | 60.89  | 61.21  | 61.38  | 62.11  | 62.8   | 63.32  | 63.66  |
| 15  | 13491072 | Panax ginseng root dry   |          | 60.9   | 61.29  | 62.23  | 62.74  | 63.28  | 64.14  | 64.6   |
| 16  | 14395776 | Other                    |          | 60.9   | 61.34  | 61.81  | 62.51  | 62.97  | 63.37  | 64.02  |
| 17  | 14450322 | Panax notoginseng        |          | 60.72  | 61.02  | 61.79  | 62.3   | 62.88  | 63.41  | 63.89  |
| 18  | 14515654 | Other                    |          | 60.12  | 60.67  | 61.51  | 61.72  | 62.29  | 62.72  | 63.45  |
| 19  | 11893982 | dH2O                     |          |        |        |        |        |        |        |        |
| 20  | 174      | dH2O                     |          |        |        |        |        |        |        |        |

| No. | Color | Name | Genotype | Peak 8 | Peak 9 | Peak 10 | Peak 11 | Peak 12 | Peak 13 | Peak 14 |
|-----|-------|------|----------|--------|--------|---------|---------|---------|---------|---------|
|-----|-------|------|----------|--------|--------|---------|---------|---------|---------|---------|

|    |              |                        |       |       |       |       |       |       |       |
|----|--------------|------------------------|-------|-------|-------|-------|-------|-------|-------|
| 1  | 255 QBG      | Phytolacca americana   | 64.6  | 65.31 | 66.04 | 66.48 | 66.88 | 67.19 | 67.82 |
| 2  | 51400 QBG    | Phytolacca japonica    | 64.47 | 64.97 | 65.51 | 65.97 | 66.56 | 66.86 | 67.17 |
| 3  | 16711680 QBG | Talinum crassifolium   | 64.82 | 65.34 | 65.83 | 66.23 | 66.61 | 66.89 | 67.38 |
| 4  | 8388736 QBG  | Talinum fruticosum     | 66.19 | 81.66 |       |       |       |       |       |
| 5  | 16744703 QBG | Talinum paniculatum    | 63.94 | 64.63 | 65.17 | 65.74 | 66.09 | 66.4  | 67.02 |
| 6  | 16744448 QBG | Talinum triangulare    | 63.46 | 63.9  | 64.48 | 65.02 | 65.31 | 65.76 | 66.36 |
| 7  | 8421376      | Other                  | 64.41 | 64.79 | 65.24 | 65.87 | 66.42 | 66.81 | 67.41 |
| 8  | 8421631      | Other                  | 64.45 | 65.24 | 66.09 | 66.76 | 67.46 | 68.57 | 69.17 |
| 9  | 1677088      | Other                  | 63.18 | 63.67 | 64.12 | 65.19 | 65.63 | 66.24 | 66.69 |
| 10 | 16711935     | Other                  | 64.47 | 64.85 | 65.97 | 67.11 | 67.74 | 68.33 | 68.72 |
| 11 | 197379       | Other                  | 64    | 64.27 | 64.85 | 65.35 | 65.77 | 66.56 | 67.22 |
| 12 | 13158400     | Other                  | 63.88 | 64.41 | 64.84 | 65.31 | 65.8  | 66.11 | 66.43 |
| 13 | 8504538      | Talinum triangulare2   | 63.71 | 64.41 | 65.31 | 65.72 | 66.27 | 66.97 | 67.31 |
| 14 | 8510085      | Other                  | 64.07 | 64.67 | 65.01 | 65.57 | 66.08 | 67.14 | 67.84 |
| 15 | 13491072     | Panax ginseng root dry | 65.15 | 65.85 | 66.5  | 66.98 | 67.67 | 68.37 | 68.72 |
| 16 | 14395776     | Other                  | 64.64 | 65.08 | 65.44 | 65.81 | 66.52 | 66.91 | 67.61 |
| 17 | 14450322     | Panax notoginseng      | 64.19 | 65.37 | 65.87 | 66.42 | 67.37 | 67.58 | 68.2  |
| 18 | 14515654     | Other                  | 64.37 | 65.26 | 65.71 | 66.07 | 66.91 | 67.54 | 68.2  |
| 19 | 11893982     | dH2O                   |       |       |       |       |       |       |       |
| 20 | 174          | dH2O                   |       |       |       |       |       |       |       |

| No. | Color        | Name                   | Genotype | Peak 15 | Peak 16 | Peak 17 | Peak 18 | Peak 19 | Peak 20 | Peak 21 |
|-----|--------------|------------------------|----------|---------|---------|---------|---------|---------|---------|---------|
| 1   | 255 QBG      | Phytolacca americana   |          | 68.36   | 68.69   | 69.24   | 69.91   | 70.32   | 70.88   | 71.31   |
| 2   | 51400 QBG    | Phytolacca japonica    |          | 67.74   | 68.7    | 69.07   | 69.76   | 70.23   | 70.9    | 71.44   |
| 3   | 16711680 QBG | Talinum crassifolium   |          | 67.73   | 68.31   | 69.11   | 69.82   | 70.96   | 71.87   | 74.26   |
| 4   | 8388736 QBG  | Talinum fruticosum     |          |         |         |         |         |         |         |         |
| 5   | 16744703 QBG | Talinum paniculatum    |          | 67.77   | 68.4    | 68.79   | 69.14   | 69.77   | 70.2    | 70.91   |
| 6   | 16744448 QBG | Talinum triangulare    |          | 66.95   | 67.71   | 68.28   | 68.79   | 69.42   | 69.89   | 70.38   |
| 7   | 8421376      | Other                  |          | 67.89   | 68.59   | 69.11   | 69.61   | 70.16   | 70.74   | 71.14   |
| 8   | 8421631      | Other                  |          | 69.68   | 70.37   | 71.15   | 71.87   | 72.18   | 72.8    | 73.09   |
| 9   | 1677088      | Other                  |          | 67.31   | 67.54   | 67.9    | 68.32   | 68.79   | 69.12   | 69.67   |
| 10  | 16711935     | Other                  |          | 69.31   | 69.93   | 70.32   | 71.01   | 71.41   | 71.75   | 72.17   |
| 11  | 197379       | Other                  |          | 67.82   | 68.27   | 68.77   | 69.2    | 69.7    | 70.26   | 71.14   |
| 12  | 13158400     | Other                  |          | 66.97   | 67.41   | 67.69   | 68.52   | 68.96   | 69.18   | 69.72   |
| 13  | 8504538      | Talinum triangulare2   |          | 67.68   | 68.48   | 69.23   | 69.69   | 70.22   | 70.93   | 71.9    |
| 14  | 8510085      | Other                  |          | 80.34   | 82.09   | 82.48   |         |         |         |         |
| 15  | 13491072     | Panax ginseng root dry |          | 69.39   | 70.14   | 70.45   | 70.97   | 71.4    | 71.93   | 72.16   |

|    |          |                   |       |       |       |       |       |       |       |
|----|----------|-------------------|-------|-------|-------|-------|-------|-------|-------|
| 16 | 14395776 | Other             | 67.79 | 68.55 | 69.3  | 70.08 | 70.45 | 70.94 | 71.22 |
| 17 | 14450322 | Panax notoginseng | 68.56 | 69.07 | 69.28 | 69.72 | 70.39 | 70.93 | 71.59 |
| 18 | 14515654 | Other             | 68.59 | 69.1  | 69.64 | 70.1  | 70.38 | 70.82 | 71.3  |
| 19 | 11893982 | dH2O              |       |       |       |       |       |       |       |
| 20 | 174      | dH2O              |       |       |       |       |       |       |       |

| No. | Color    | Name                     | Genotype | Peak 22 | Peak 23 | Peak 24 | Peak 25 | Peak 26 | Peak 27 | Peak 28 |
|-----|----------|--------------------------|----------|---------|---------|---------|---------|---------|---------|---------|
| 1   | 255      | QBG Phytolacca americana |          | 71.76   | 72.21   | 73.01   | 73.33   | 73.87   | 74.17   | 74.9    |
| 2   | 51400    | QBG Phytolacca japonica  |          | 71.83   | 72.34   | 72.73   | 73.28   | 73.62   | 74.22   | 74.92   |
| 3   | 16711680 | QBG Talinum crassifolium |          | 76      | 78.2    | 80.58   | 82.41   |         |         |         |
| 4   | 8388736  | QBG Talinum fruticosum   |          |         |         |         |         |         |         |         |
| 5   | 16744703 | QBG Talinum paniculatum  |          | 71.38   | 71.91   | 72.14   | 73.54   | 74.01   | 74.57   | 75.66   |
| 6   | 16744448 | QBG Talinum triangulare  |          | 71.01   | 71.39   | 71.91   | 72.4    | 73.08   | 73.58   | 74.28   |
| 7   | 8421376  | Other                    |          | 71.49   | 71.95   | 72.36   | 72.67   | 73.39   | 74.31   | 75.11   |
| 8   | 8421631  | Other                    |          | 73.78   | 74.28   | 74.69   | 75.45   | 75.71   | 76.11   | 76.41   |
| 9   | 1677088  | Other                    |          | 70.14   | 70.44   | 70.87   | 71.17   | 71.66   | 72.23   | 72.92   |
| 10  | 16711935 | Other                    |          | 72.97   | 73.51   | 74.07   | 74.51   | 75.74   | 76.58   | 77.22   |
| 11  | 197379   | Other                    |          | 71.69   | 72.87   | 74.08   | 74.9    | 75.75   | 76.24   | 76.79   |
| 12  | 13158400 | Other                    |          | 70.26   | 70.71   | 71.02   | 71.52   | 71.89   | 72.69   | 73.04   |
| 13  | 8504538  | Talinum triangulare2     |          | 72.27   | 72.92   | 73.34   | 73.86   | 74.17   | 74.7    | 75.47   |
| 14  | 8510085  | Other                    |          |         |         |         |         |         |         |         |
| 15  | 13491072 | Panax ginseng root dry   |          | 72.8    | 73.38   | 73.9    | 74.38   | 74.79   | 75.41   | 75.82   |
| 16  | 14395776 | Other                    |          | 71.77   | 71.9    | 72.29   | 72.97   | 73.88   | 74.09   | 74.71   |
| 17  | 14450322 | Panax notoginseng        |          | 71.78   | 72.31   | 73.1    | 73.48   | 74.18   | 74.89   | 75.57   |
| 18  | 14515654 | Other                    |          | 71.82   | 72.18   | 72.91   | 73.28   | 73.7    | 74.2    | 74.82   |
| 19  | 11893982 | dH2O                     |          |         |         |         |         |         |         |         |
| 20  | 174      | dH2O                     |          |         |         |         |         |         |         |         |

| No. | Color    | Name                     | Genotype | Peak 29 | Peak 30 | Peak 31 | Peak 32 | Peak 33 | Peak 34 | Peak 35 |
|-----|----------|--------------------------|----------|---------|---------|---------|---------|---------|---------|---------|
| 1   | 255      | QBG Phytolacca americana |          | 75.52   | 75.77   | 76.22   | 76.84   | 77.42   | 77.63   | 78.14   |
| 2   | 51400    | QBG Phytolacca japonica  |          | 75.54   | 76.07   | 76.78   | 77.15   | 77.74   | 78.41   | 79.28   |
| 3   | 16711680 | QBG Talinum crassifolium |          |         |         |         |         |         |         |         |
| 4   | 8388736  | QBG Talinum fruticosum   |          |         |         |         |         |         |         |         |
| 5   | 16744703 | QBG Talinum paniculatum  |          | 76.2    | 76.98   | 77.63   | 78.18   | 80.437  | 82.17   |         |
| 6   | 16744448 | QBG Talinum triangulare  |          | 74.77   | 75.11   | 75.4    | 76      | 76.3    | 76.84   | 77.24   |
| 7   | 8421376  | Other                    |          | 75.62   | 76.14   | 76.81   | 77.57   | 80.91   |         |         |
| 8   | 8421631  | Other                    |          | 76.7    | 77.17   | 77.64   | 78.21   | 78.77   | 81.27   |         |
| 9   | 1677088  | Other                    |          | 73.68   | 74.21   | 74.55   | 74.78   | 75.42   | 75.9    | 76.39   |

|    |          |                        |       |       |       |       |       |       |       |
|----|----------|------------------------|-------|-------|-------|-------|-------|-------|-------|
| 10 | 16711935 | Other                  | 78.04 | 80.33 | 82.04 |       |       |       |       |
| 11 | 197379   | Other                  | 77.77 | 80.37 | 81.99 |       |       |       |       |
| 12 | 13158400 | Other                  | 73.61 | 74.1  | 75.17 | 75.51 | 76.11 | 76.95 | 77.31 |
| 13 | 8504538  | Talinum triangulare2   | 76.19 | 76.77 | 77.14 | 77.81 | 80.47 | 82.37 |       |
| 14 | 8510085  | Other                  |       |       |       |       |       |       |       |
| 15 | 13491072 | Panax ginseng root dry | 76.66 | 77.21 | 77.68 | 78.04 | 78.82 | 79.8  | 80.27 |
| 16 | 14395776 | Other                  | 75.08 | 75.73 | 76.12 | 76.8  | 77.15 | 77.71 | 78.11 |
| 17 | 14450322 | Panax notoginseng      | 76.14 | 76.74 | 77.23 | 77.77 | 78.18 | 78.66 | 79.6  |
| 18 | 14515654 | Other                  | 75.28 | 75.81 | 76.41 | 76.8  | 77.64 | 78.3  | 79.07 |
| 19 | 11893982 | dH2O                   |       |       |       |       |       |       |       |
| 20 | 174      | dH2O                   |       |       |       |       |       |       |       |

| No. | Color    | Name                     | Genotype | Peak 36 | Peak 37 | Peak 38 | Peak 39 | Peak 40 | Peak 41 |
|-----|----------|--------------------------|----------|---------|---------|---------|---------|---------|---------|
| 1   | 255      | QBG Phytolacca americana |          | 78.71   | 81.51   |         |         |         |         |
| 2   | 51400    | QBG Phytolacca japonica  |          | 81.31   |         |         |         |         |         |
| 3   | 16711680 | QBG Talinum crassifolium |          |         |         |         |         |         |         |
| 4   | 8388736  | QBG Talinum fruticosum   |          |         |         |         |         |         |         |
| 5   | 16744703 | QBG Talinum paniculatum  |          |         |         |         |         |         |         |
| 6   | 16744448 | QBG Talinum triangulare  |          | 77.63   | 80.45   | 82.27   |         |         |         |
| 7   | 8421376  | Other                    |          |         |         |         |         |         |         |
| 8   | 8421631  | Other                    |          |         |         |         |         |         |         |
| 9   | 1677088  | Other                    |          | 77.09   | 77.94   | 80.44   | 82.02   |         |         |
| 10  | 16711935 | Other                    |          |         |         |         |         |         |         |
| 11  | 197379   | Other                    |          |         |         |         |         |         |         |
| 12  | 13158400 | Other                    |          | 77.87   | 80.36   | 82.45   |         |         |         |
| 13  | 8504538  | Talinum triangulare2     |          |         |         |         |         |         |         |
| 14  | 8510085  | Other                    |          |         |         |         |         |         |         |
| 15  | 13491072 | Panax ginseng root dry   |          | 80.81   | 81.19   | 81.69   | 83.94   |         |         |
| 16  | 14395776 | Other                    |          | 79.12   | 79.51   | 79.81   | 80.3    | 81.28   | 83.69   |
| 17  | 14450322 | Panax notoginseng        |          | 80.19   | 80.72   | 83.78   |         |         |         |
| 18  | 14515654 | Other                    |          | 81.09   | 82.64   |         |         |         |         |
| 19  | 11893982 | dH2O                     |          |         |         |         |         |         |         |
| 20  | 174      | dH2O                     |          |         |         |         |         |         |         |

trnL(3)

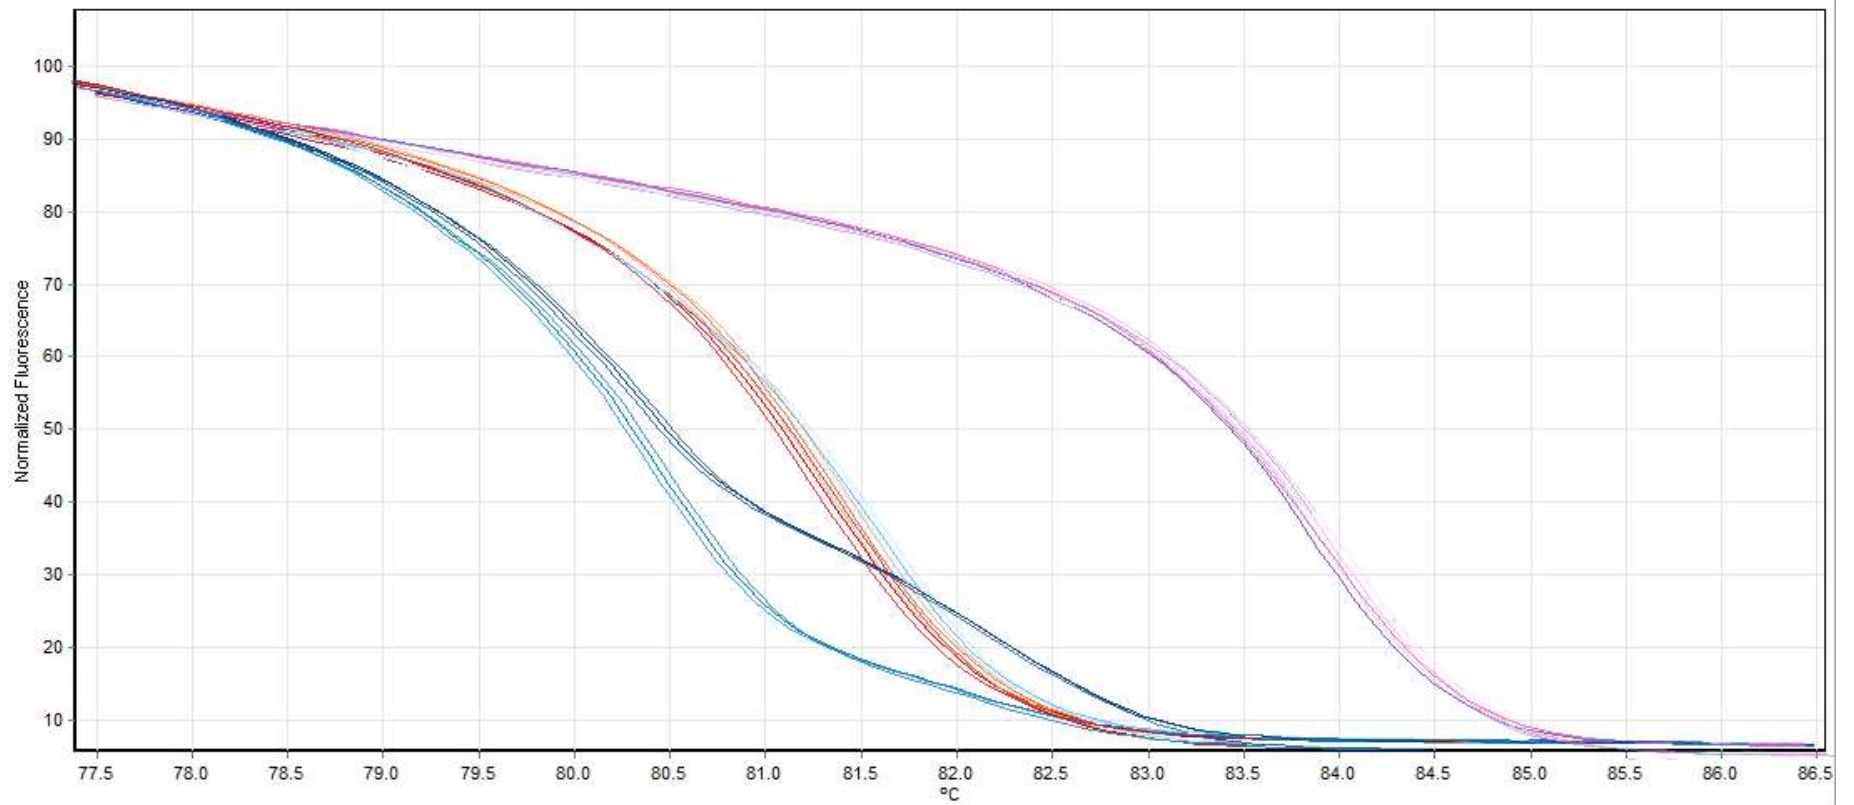

Excel Analysed Data Export

Copyright (c) 2013 QIAGEN GmbH. All Rights Reserved.

File panax HRM\_ITS2(1).rex

Operator

Run Id

Notes

Machine Serial No 814137

Channel

Gain



Green 5  
 Yellow 5  
 Orange 5  
 Red 5  
 HRM -2.33333  
 Crimson 7

Channel Threshold

HRM A.HRM (Page 0

Melt analysis of HRM A.HRM (Page 1)

| No. | Color    | Name                     | Genotype | Peak 1 | Peak 2 | Peak 3 | Peak 4 | Peak 5 | Peak 6 | Peak 7 |
|-----|----------|--------------------------|----------|--------|--------|--------|--------|--------|--------|--------|
| 1   | 255      | QBG phytolacca americana |          | 60.87  | 61.2   | 61.75  | 62.07  | 62.35  | 62.9   | 63.7   |
| 2   | 51400    | QBG phytolacca japonica  |          | 60.93  | 61.45  | 61.95  | 62.72  | 63.53  | 64.05  | 64.5   |
| 3   | 16711680 | QBG talinum crassifolium |          | 60.65  | 61.4   | 61.8   | 62.2   | 62.97  | 63.6   | 64.05  |
| 4   | 8388736  | QBG talinum fruticosum   |          | 60.53  | 61.15  | 61.75  | 62.13  | 62.45  | 62.9   | 63.27  |
| 5   | 16744703 | QBG talinum paniculatum  |          | 60.35  | 60.88  | 61.15  | 61.68  | 62.5   | 63     | 63.75  |
| 6   | 16744448 | QBG talinum triangulare  |          | 60.17  | 60.87  | 61.37  | 61.6   | 61.98  | 62.62  | 63.25  |
| 7   | 8421376  | Other                    |          | 60.93  | 61.4   | 61.9   | 62.15  | 62.73  | 63.45  | 64.03  |
| 8   | 8421631  | phytolacca japonica      |          | 60.85  | 61.55  | 62.2   | 62.83  | 63.7   | 64.12  | 64.55  |
| 9   | 1677088  | Other                    |          | 60.72  | 61.2   | 61.8   | 62.92  | 63.85  | 64.27  | 64.93  |
| 10  | 16711935 | Other                    |          | 60.15  | 60.78  | 61.13  | 61.7   | 62.1   | 62.52  | 63.15  |
| 11  | 197379   | Other                    |          | 60.73  | 61.45  | 61.67  | 62.15  | 62.7   | 63.2   | 63.6   |
| 12  | 13158400 | Other                    |          | 60.87  | 61.45  | 61.82  | 62.17  | 62.72  | 63.5   | 64.05  |
| 13  | 8504538  | Other                    |          | 60.57  | 60.95  | 61.32  | 61.75  | 62.52  | 62.9   | 63.4   |
| 14  | 8510085  | phytolacca americana dry |          | 60.25  | 60.5   | 61.12  | 61.75  | 62.28  | 62.95  | 63.75  |
| 15  | 13491072 | panax ginseng dry        |          | 60.25  | 61.12  | 61.68  | 62.03  | 62.3   | 62.55  | 63.13  |
| 16  | 14395776 | Other                    |          | 60.12  | 60.67  | 61.55  | 61.9   | 62.7   | 63.5   | 64.05  |
| 17  | 14450322 | panax notoginseng        |          | 60.95  | 61.43  | 61.9   | 62.05  | 62.77  | 63.35  | 64.03  |
| 18  | 14515654 | phytolacca americana     |          | 60.65  | 61.2   | 61.75  | 62.25  | 62.85  | 63.65  | 64.32  |
| 19  | 11893982 | dH2O                     |          | 60.43  | 60.75  | 61.18  | 61.72  | 62.02  | 62.45  | 63.05  |

| No. | Color | Name                     | Genotype | Peak 8 | Peak 9 | Peak 10 | Peak 11 | Peak 12 | Peak 13 | Peak 14 |
|-----|-------|--------------------------|----------|--------|--------|---------|---------|---------|---------|---------|
| 1   | 255   | QBG phytolacca americana |          | 64.25  | 64.65  | 65.02   | 65.7    | 66.15   | 66.62   | 67.3    |
| 2   | 51400 | QBG phytolacca japonica  |          | 65.13  | 65.57  | 66.25   | 66.62   | 67.1    | 67.65   | 68.33   |

|    |          |                          |       |       |       |       |       |       |       |
|----|----------|--------------------------|-------|-------|-------|-------|-------|-------|-------|
| 3  | 16711680 | QBG talinum crassifolium | 64.65 | 65.25 | 65.6  | 66.2  | 66.6  | 67.15 | 67.67 |
| 4  | 8388736  | QBG talinum fruticosum   | 63.73 | 64.25 | 64.97 | 66    | 66.7  | 67.3  | 67.75 |
| 5  | 16744703 | QBG talinum paniculatum  | 64.22 | 65.1  | 65.75 | 66.15 | 66.4  | 66.85 | 67.33 |
| 6  | 16744448 | QBG talinum triangulare  | 63.67 | 64.03 | 64.48 | 64.98 | 65.47 | 66.08 | 66.62 |
| 7  | 8421376  | Other                    | 64.45 | 64.88 | 65.28 | 65.58 | 66.3  | 66.55 | 66.77 |
| 8  | 8421631  | phytolacca japonica      | 65.47 | 66.2  | 66.75 | 67.2  | 67.65 | 68.35 | 68.92 |
| 9  | 1677088  | Other                    | 65.37 | 65.85 | 66.33 | 66.68 | 67.3  | 68.02 | 68.6  |
| 10 | 16711935 | Other                    | 63.73 | 64.15 | 64.97 | 65.4  | 66.17 | 66.77 | 67.32 |
| 11 | 197379   | Other                    | 64.07 | 64.58 | 64.98 | 65.35 | 65.8  | 66.17 | 66.63 |
| 12 | 13158400 | Other                    | 64.5  | 65.33 | 65.83 | 66.2  | 66.6  | 67.12 | 67.68 |
| 13 | 8504538  | Other                    | 63.93 | 64.15 | 64.58 | 65.08 | 65.82 | 66.58 | 67.2  |
| 14 | 8510085  | phytolacca americana dry | 64.3  | 65.05 | 65.8  | 66.1  | 66.73 | 67.38 | 67.67 |
| 15 | 13491072 | panax ginseng dry        | 63.7  | 64.23 | 65.1  | 65.73 | 66.1  | 66.55 | 66.75 |
| 16 | 14395776 | Other                    | 64.55 | 64.95 | 65.35 | 65.73 | 66.55 | 67    | 67.1  |
| 17 | 14450322 | panax notoginseng        | 64.58 | 65.2  | 65.65 | 66.2  | 66.57 | 67.15 | 67.67 |
| 18 | 14515654 | phytolacca americana     | 64.52 | 64.85 | 64.97 | 65.25 | 65.78 | 66.12 | 66.68 |
| 19 | 11893982 | dH2O                     | 63.82 | 64.28 | 64.9  | 65.45 | 65.87 | 66.3  | 66.85 |

| No. | Color    | Name                     | Genotype | Peak 15 | Peak 16 | Peak 17 | Peak 18 | Peak 19 | Peak 20 | Peak 21 |
|-----|----------|--------------------------|----------|---------|---------|---------|---------|---------|---------|---------|
| 1   | 255      | QBG phytolacca americana |          | 67.65   | 67.93   | 68.38   | 69      | 69.35   | 69.73   | 70.33   |
| 2   | 51400    | QBG phytolacca japonica  |          | 68.85   | 69.35   | 70.13   | 70.53   | 71.07   | 71.72   | 72.75   |
| 3   | 16711680 | QBG talinum crassifolium |          | 68.33   | 68.8    | 69.5    | 70.45   | 70.82   | 71.25   | 72.05   |
| 4   | 8388736  | QBG talinum fruticosum   |          | 67.97   | 68.6    | 69.1    | 69.5    | 70.3    | 70.87   | 71.42   |
| 5   | 16744703 | QBG talinum paniculatum  |          | 68.15   | 68.63   | 69.22   | 69.98   | 70.65   | 71.13   | 71.5    |
| 6   | 16744448 | QBG talinum triangulare  |          | 67.25   | 68.12   | 69.25   | 69.87   | 70.6    | 71.25   | 71.83   |
| 7   | 8421376  | Other                    |          | 67.15   | 67.58   | 68.25   | 68.95   | 69.53   | 70.57   | 71.27   |
| 8   | 8421631  | phytolacca japonica      |          | 69.5    | 70.35   | 70.75   | 71.3    | 72.02   | 72.75   | 73.25   |
| 9   | 1677088  | Other                    |          | 69.15   | 69.5    | 70.2    | 70.75   | 71.42   | 72.1    | 72.57   |
| 10  | 16711935 | Other                    |          | 67.72   | 68.17   | 68.63   | 69.15   | 69.9    | 70.27   | 70.87   |
| 11  | 197379   | Other                    |          | 67.08   | 68.05   | 68.32   | 68.97   | 69.35   | 70.1    | 70.95   |
| 12  | 13158400 | Other                    |          | 68.3    | 68.97   | 69.5    | 70.35   | 70.95   | 71.3    | 71.73   |
| 13  | 8504538  | Other                    |          | 67.72   | 68.42   | 68.98   | 69.48   | 70.52   | 70.95   | 71.32   |
| 14  | 8510085  | phytolacca americana dry |          | 68.58   | 69.2    | 69.88   | 70.17   | 70.7    | 71.45   | 72.1    |
| 15  | 13491072 | panax ginseng dry        |          | 67.22   | 67.55   | 68.17   | 68.63   | 69.25   | 69.95   | 70.53   |
| 16  | 14395776 | Other                    |          | 67.55   | 67.93   | 68.37   | 68.97   | 69.38   | 69.85   | 70.77   |
| 17  | 14450322 | panax notoginseng        |          | 68.17   | 68.88   | 69.52   | 70.3    | 70.55   | 71.2    | 71.75   |
| 18  | 14515654 | phytolacca americana     |          | 67      | 67.3    | 67.7    | 68.05   | 68.53   | 69.05   | 69.75   |

| No. | Color    | Name                     | Genotype | Peak 22 | Peak 23 | Peak 24 | Peak 25 | Peak 26 | Peak 27 | Peak 28 |
|-----|----------|--------------------------|----------|---------|---------|---------|---------|---------|---------|---------|
| 19  |          | 11893982 dH2O            |          | 67.35   | 67.77   | 68.2    | 68.7    | 69.15   | 69.9    | 70.75   |
| 1   | 255      | QBG phytolacca americana |          | 70.83   | 71.23   | 72.05   | 72.97   | 73.55   | 74.35   | 75.05   |
| 2   | 51400    | QBG phytolacca japonica  |          | 73.17   | 73.45   | 74.13   | 74.62   | 75.12   | 75.7    | 76.22   |
| 3   | 16711680 | QBG talinum crassifolium |          | 72.43   | 73.07   | 73.55   | 74.15   | 74.55   | 75.35   | 75.63   |
| 4   | 8388736  | QBG talinum fruticosum   |          | 72.07   | 72.73   | 73.67   | 74.6    | 75.3    | 76.15   | 76.75   |
| 5   | 16744703 | QBG talinum paniculatum  |          | 71.8    | 72.05   | 72.45   | 72.92   | 73.38   | 73.9    | 74.28   |
| 6   | 16744448 | QBG talinum triangulare  |          | 72.47   | 72.85   | 73.3    | 73.93   | 74.42   | 75.03   | 75.52   |
| 7   | 8421376  | Other                    |          | 71.77   | 72.5    | 72.85   | 73.47   | 74.2    | 75.08   | 75.48   |
| 8   | 8421631  | phytolacca japonica      |          | 73.57   | 74.15   | 74.3    | 75.02   | 75.4    | 75.98   | 76.45   |
| 9   | 1677088  | Other                    |          | 73.1    | 73.67   | 74.33   | 74.75   | 75.3    | 75.83   | 76.43   |
| 10  | 16711935 | Other                    |          | 71.82   | 72.25   | 72.78   | 73.87   | 74.7    | 75.47   | 76.05   |
| 11  | 197379   | Other                    |          | 71.3    | 71.78   | 72.65   | 73.25   | 73.72   | 74.25   | 74.6    |
| 12  | 13158400 | Other                    |          | 72.1    | 72.5    | 73.05   | 73.45   | 74.15   | 74.47   | 75      |
| 13  | 8504538  | Other                    |          | 72.05   | 72.4    | 72.8    | 73.52   | 74.3    | 74.85   | 75.22   |
| 14  | 8510085  | phytolacca americana dry |          | 72.8    | 73.25   | 73.82   | 74.7    | 75.35   | 76      | 76.8    |
| 15  | 13491072 | panax ginseng dry        |          | 71.28   | 71.85   | 72.6    | 73.1    | 73.9    | 74.37   | 74.75   |
| 16  | 14395776 | Other                    |          | 71.3    | 71.75   | 72.45   | 73.32   | 73.9    | 74.25   | 74.75   |
| 17  | 14450322 | panax notoginseng        |          | 72.4    | 73.45   | 74.15   | 74.65   | 75.1    | 75.63   | 76.23   |
| 18  | 14515654 | phytolacca americana     |          | 70.37   | 71.22   | 71.5    | 72.07   | 72.5    | 73.08   | 73.62   |
| 19  | 11893982 | dH2O                     |          | 71.37   | 71.87   | 72.77   | 73.85   | 74.47   | 74.8    | 75.33   |
| No. | Color    | Name                     | Genotype | Peak 29 | Peak 30 | Peak 31 | Peak 32 | Peak 33 | Peak 34 | Peak 35 |
| 1   | 255      | QBG phytolacca americana |          | 75.42   | 75.95   | 76.43   | 76.83   | 77.3    | 77.95   | 78.3    |
| 2   | 51400    | QBG phytolacca japonica  |          | 77.05   | 77.55   | 78      | 78.52   | 78.78   | 79.28   | 79.57   |
| 3   | 16711680 | QBG talinum crassifolium |          | 76.42   | 77.15   | 77.58   | 78      | 78.35   | 78.87   | 79.18   |
| 4   | 8388736  | QBG talinum fruticosum   |          | 77.27   | 77.83   | 78.3    | 78.6    | 79.4    | 80.15   | 80.63   |
| 5   | 16744703 | QBG talinum paniculatum  |          | 74.73   | 75.42   | 76.12   | 76.7    | 77.72   | 78.22   | 78.53   |
| 6   | 16744448 | QBG talinum triangulare  |          | 76.15   | 76.62   | 77.02   | 77.52   | 78.15   | 78.75   | 79.48   |
| 7   | 8421376  | Other                    |          | 76.25   | 77.1    | 77.58   | 78.03   | 78.52   | 79.05   | 79.7    |
| 8   | 8421631  | phytolacca japonica      |          | 77.17   | 77.93   | 78.45   | 79.17   | 79.95   | 80.77   | 81.43   |
| 9   | 1677088  | Other                    |          | 76.75   | 77.53   | 77.8    | 78.33   | 78.65   | 79.4    | 79.93   |
| 10  | 16711935 | Other                    |          | 76.7    | 76.82   | 77.47   | 77.75   | 78.35   | 78.95   | 79.43   |
| 11  | 197379   | Other                    |          | 75.15   | 75.7    | 76.1    | 76.53   | 77.07   | 77.68   | 78.17   |
| 12  | 13158400 | Other                    |          | 75.43   | 75.72   | 76.22   | 76.97   | 77.63   | 77.97   | 78.5    |
| 13  | 8504538  | Other                    |          | 75.65   | 76.45   | 77.13   | 77.75   | 78      | 78.4    | 78.88   |
| 14  | 8510085  | phytolacca americana dry |          | 77.4    | 77.85   | 78.37   | 78.7    | 79.42   | 80.12   | 80.78   |

|    |          |                      |       |       |       |       |       |       |       |
|----|----------|----------------------|-------|-------|-------|-------|-------|-------|-------|
| 15 | 13491072 | panax ginseng dry    | 75.45 | 76.03 | 76.77 | 77.37 | 78.05 | 78.95 | 79.52 |
| 16 | 14395776 | Other                | 75.08 | 75.7  | 76.18 | 76.57 | 77    | 77.45 | 78.18 |
| 17 | 14450322 | panax notoginseng    | 76.63 | 77.1  | 77.6  | 77.98 | 78.43 | 78.9  | 79.2  |
| 18 | 14515654 | phytolacca americana | 74.3  | 74.87 | 75.35 | 75.82 | 76.62 | 77.17 | 77.83 |
| 19 | 11893982 | dH2O                 | 75.97 | 76.72 | 77.42 | 77.83 | 78.3  | 78.85 | 79.42 |

| No. | Color    | Name                     | Genotype | Peak 36 | Peak 37 | Peak 38 | Peak 39 | Peak 40 | Peak 41 | Peak 42 |
|-----|----------|--------------------------|----------|---------|---------|---------|---------|---------|---------|---------|
| 1   | 255      | QBG phytolacca americana |          | 78.87   | 79.17   | 79.65   | 80.4    | 81      | 81.32   | 81.73   |
| 2   | 51400    | QBG phytolacca japonica  |          | 80.05   | 80.42   | 81.05   | 81.93   | 82.78   | 83.42   | 83.85   |
| 3   | 16711680 | QBG talinum crassifolium |          | 79.6    | 80.35   | 80.75   | 81.2    | 81.87   | 82.32   | 82.75   |
| 4   | 8388736  | QBG talinum fruticosum   |          | 81.2    | 81.5    | 82.4    | 83.17   | 83.63   | 84      | 84.35   |
| 5   | 16744703 | QBG talinum paniculatum  |          | 78.97   | 79.45   | 80.12   | 80.52   | 81.05   | 81.43   | 81.8    |
| 6   | 16744448 | QBG talinum triangulare  |          | 80.4    | 81.1    | 81.7    | 82.13   | 82.83   | 83.12   | 83.7    |
| 7   | 8421376  | Other                    |          | 80.4    | 81.1    | 82.05   | 82.75   | 83.07   | 83.53   | 84.05   |
| 8   | 8421631  | phytolacca japonica      |          | 82.33   | 82.78   | 84.52   | 85.37   | 85.98   | 86.72   | 87.07   |
| 9   | 1677088  | Other                    |          | 80.13   | 80.65   | 80.85   | 81.35   | 82      | 82.42   | 83.27   |
| 10  | 16711935 | Other                    |          | 80.1    | 80.7    | 81.63   | 82.05   | 82.5    | 83.43   | 84.05   |
| 11  | 197379   | Other                    |          | 78.75   | 79.2    | 79.45   | 79.95   | 80.37   | 81.07   | 81.78   |
| 12  | 13158400 | Other                    |          | 79.08   | 79.6    | 80.07   | 80.55   | 80.67   | 81.13   | 81.58   |
| 13  | 8504538  | Other                    |          | 79.58   | 80      | 80.8    | 81.35   | 81.88   | 82.33   | 82.73   |
| 14  | 8510085  | phytolacca americana dry |          | 81.33   | 81.82   | 82.52   | 82.95   | 83.47   | 83.95   | 84.38   |
| 15  | 13491072 | panax ginseng dry        |          | 79.95   | 80.27   | 80.72   | 81.05   | 81.4    | 82.17   | 82.65   |
| 16  | 14395776 | Other                    |          | 78.73   | 79.3    | 80.02   | 80.55   | 81.05   | 81.73   | 82.15   |
| 17  | 14450322 | panax notoginseng        |          | 79.67   | 80.5    | 80.93   | 81.45   | 81.95   | 82.35   | 83      |
| 18  | 14515654 | phytolacca americana     |          | 78.3    | 78.92   | 79.55   | 79.95   | 80.75   | 81.3    | 81.9    |
| 19  | 11893982 | dH2O                     |          | 79.85   | 80.13   | 80.57   | 81.35   | 82.45   | 82.9    | 83.25   |

| No. | Color    | Name                     | Genotype | Peak 43 | Peak 44 | Peak 45 | Peak 46 | Peak 47 | Peak 48 | Peak 49 |
|-----|----------|--------------------------|----------|---------|---------|---------|---------|---------|---------|---------|
| 1   | 255      | QBG phytolacca americana |          | 82.4    | 82.8    | 83.35   | 83.7    | 84.2    | 84.45   | 85.07   |
| 2   | 51400    | QBG phytolacca japonica  |          | 84.2    | 84.87   | 85.37   | 85.8    | 86.23   | 86.75   | 87.92   |
| 3   | 16711680 | QBG talinum crassifolium |          | 83.45   | 83.75   | 84.63   | 85.15   | 85.72   | 86.15   | 86.68   |
| 4   | 8388736  | QBG talinum fruticosum   |          | 87.67   |         |         |         |         |         |         |
| 5   | 16744703 | QBG talinum paniculatum  |          | 82.53   | 82.97   | 83.52   | 84.05   | 84.55   | 84.83   | 85.3    |
| 6   | 16744448 | QBG talinum triangulare  |          | 84.17   | 84.9    | 85.35   | 85.85   | 86.33   | 86.78   | 87.95   |
| 7   | 8421376  | Other                    |          | 84.78   | 85.25   | 85.65   | 86.12   | 86.68   | 87.1    | 87.95   |
| 8   | 8421631  | phytolacca japonica      |          | 88.33   | 88.77   | 89.65   |         |         |         |         |
| 9   | 1677088  | Other                    |          | 83.65   | 84.35   | 84.85   | 85.95   | 86.4    | 87.25   | 87.72   |
| 10  | 16711935 | Other                    |          | 84.52   | 84.92   | 85.15   | 85.98   | 86.47   | 86.9    | 87.6    |

|    |          |                          |       |       |       |       |       |       |       |
|----|----------|--------------------------|-------|-------|-------|-------|-------|-------|-------|
| 11 | 197379   | Other                    | 82.05 | 82.83 | 83.67 | 84.07 | 84.82 | 85.35 | 85.82 |
| 12 | 13158400 | Other                    | 82.02 | 82.35 | 82.78 | 83.1  | 83.9  | 84.75 | 85.23 |
| 13 | 8504538  | Other                    | 83.47 | 84.23 | 84.63 | 85.08 | 86.17 | 86.65 | 87.17 |
| 14 | 8510085  | phytolacca americana dry | 84.8  | 85.13 | 85.55 | 86.37 | 86.8  | 87.3  | 87.6  |
| 15 | 13491072 | panax ginseng dry        | 83.55 | 84.15 | 85.25 | 85.63 | 86    | 86.38 | 87.68 |
| 16 | 14395776 | Other                    | 82.85 | 83.35 | 83.92 | 84    | 84.65 | 84.9  | 85.35 |
| 17 | 14450322 | panax notoginseng        | 83.48 | 83.87 | 84.33 | 84.65 | 85.23 | 85.67 | 86.08 |
| 18 | 14515654 | phytolacca americana     | 82.35 | 82.75 | 83.33 | 84.37 | 85.15 | 85.55 | 85.92 |
| 19 | 11893982 | dH2O                     | 83.63 | 84.05 | 84.45 | 85.1  | 85.55 | 85.98 | 86.4  |

| No. | Color    | Name                     | Genotype | Peak 50 | Peak 51 | Peak 52 | Peak 53 | Peak 54 | Peak 55 | Peak 56 |
|-----|----------|--------------------------|----------|---------|---------|---------|---------|---------|---------|---------|
| 1   | 255      | QBG phytolacca americana |          | 85.93   | 86.85   | 88.05   | 88.3    | 88.98   | 89.63   |         |
| 2   | 51400    | QBG phytolacca japonica  |          | 88.42   | 89.35   |         |         |         |         |         |
| 3   | 16711680 | QBG talinum crassifolium |          | 87.07   | 87.58   | 87.85   | 88.4    |         |         |         |
| 4   | 8388736  | QBG talinum fruticosum   |          |         |         |         |         |         |         |         |
| 5   | 16744703 | QBG talinum paniculatum  |          | 86.02   | 86.5    | 86.85   | 87.35   | 87.52   | 88.17   | 88.9    |
| 6   | 16744448 | QBG talinum triangulare  |          | 88.87   | 89.28   |         |         |         |         |         |
| 7   | 8421376  | Other                    |          | 88.45   | 89.15   | 89.6    |         |         |         |         |
| 8   | 8421631  | phytolacca japonica      |          |         |         |         |         |         |         |         |
| 9   | 1677088  | Other                    |          | 88.23   | 88.7    | 89.07   | 89.63   |         |         |         |
| 10  | 16711935 | Other                    |          | 88.1    | 88.87   |         |         |         |         |         |
| 11  | 197379   | Other                    |          | 86.32   | 86.9    | 87.12   | 87.42   | 87.95   | 88.38   | 88.83   |
| 12  | 13158400 | Other                    |          | 85.72   | 86.2    | 87.93   | 88.43   | 89.32   |         |         |
| 13  | 8504538  | Other                    |          | 87.85   | 88.35   | 89.17   |         |         |         |         |
| 14  | 8510085  | phytolacca americana dry |          | 88.12   | 88.57   | 88.83   | 89.5    |         |         |         |
| 15  | 13491072 | panax ginseng dry        |          | 88.2    |         |         |         |         |         |         |
| 16  | 14395776 | Other                    |          | 85.8    | 86.3    | 86.65   | 87.15   | 87.95   | 88.43   | 89.15   |
| 17  | 14450322 | panax notoginseng        |          | 86.68   | 87.85   | 88.32   | 89.03   | 89.48   |         |         |
| 18  | 14515654 | phytolacca americana     |          | 86.95   | 87.75   | 88.73   |         |         |         |         |
| 19  | 11893982 | dH2O                     |          | 86.85   | 87.3    | 87.6    | 88.1    | 88.58   | 89.05   |         |

| No. | Color    | Name                     | Genotype | Peak 57 |
|-----|----------|--------------------------|----------|---------|
| 1   | 255      | QBG phytolacca americana |          |         |
| 2   | 51400    | QBG phytolacca japonica  |          |         |
| 3   | 16711680 | QBG talinum crassifolium |          |         |
| 4   | 8388736  | QBG talinum fruticosum   |          |         |
| 5   | 16744703 | QBG talinum paniculatum  |          | 89.28   |
| 6   | 16744448 | QBG talinum triangulare  |          |         |

- 7 8421376 Other
- 8 8421631 *phytolacca japonica*
- 9 1677088 Other
- 10 16711935 Other
- 11 197379 Other 89.25
- 12 13158400 Other
- 13 8504538 Other
- 14 8510085 *phytolacca americana* dry
- 15 13491072 *panax ginseng* dry
- 16 14395776 Other 89.55
- 17 14450322 *panax notoginseng*
- 18 14515654 *phytolacca americana*
- 19 11893982 dH2O

ITS(1)

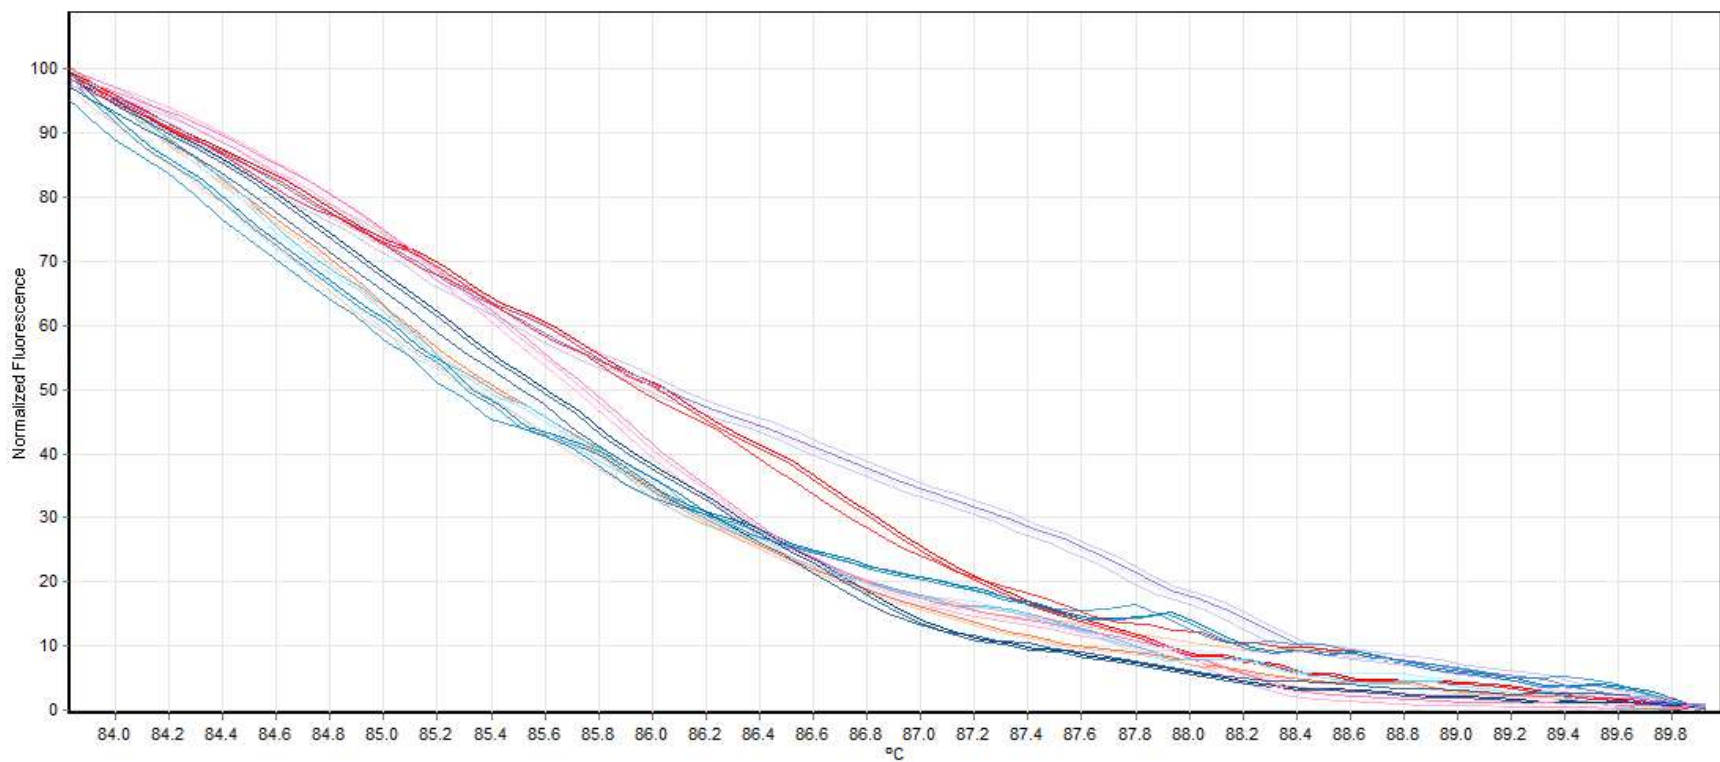

Excel Analysed Data Export

Copyright (c) 2013 QIAGEN GmbH. All Rights Reserved.

File panax HRM\_ITS2(2).rex

Operator

Run Id

Notes

Machine Serial No 814137

| Channel | Gain |
|---------|------|
| Green   | 5    |
| Yellow  | 5    |
| Orange  | 5    |
| Red     | 5    |
| HRM     | -2   |
| Crimson | 7    |

Channel Threshold

Cycling A.Green (Page 1)

HRM A.HRM (Page 0)

Melt analysis of HRM A.HRM (Page 1)

| No. | Color    | Name                     | Genotype | Peak 1 | Peak 2 | Peak 3 | Peak 4 | Peak 5 | Peak 6 | Peak 7 |
|-----|----------|--------------------------|----------|--------|--------|--------|--------|--------|--------|--------|
| 1   | 255      | QBG Phytolacca americana |          | 60.65  | 61.13  | 61.53  | 62.05  | 62.35  | 62.97  | 63.73  |
| 2   | 51400    | QBG Phytolacca japonica  |          | 60.5   | 60.92  | 61.45  | 62.28  | 62.88  | 63.32  | 63.85  |
| 3   | 16711680 | QBG Talinum crassifolium |          | 60.53  | 61.17  | 61.75  | 62.12  | 62.85  | 63.95  | 64.85  |
| 4   | 8388736  | QBG Talinum fruticosum   |          | 60.83  | 61.33  | 61.75  | 62.22  | 62.95  | 63.47  | 64.02  |
| 5   | 16744703 | QBG Talinum paniculatum  |          | 60.42  | 61.1   | 61.37  | 62.25  | 63.05  | 63.42  | 63.97  |
| 6   | 16744448 | QBG Talinum triangulare  |          | 60.45  | 61     | 61.27  | 61.72  | 62.58  | 63.05  | 63.43  |
| 7   | 8421376  | Other                    |          | 61     | 61.3   | 61.73  | 62.12  | 62.85  | 63.35  | 63.85  |
| 8   | 8421631  | Other                    |          | 60.55  | 61.03  | 61.5   | 62.08  | 63.05  | 63.82  | 64.35  |
| 9   | 1677088  | Other                    |          | 60.52  | 61.35  | 61.75  | 62.15  | 62.58  | 63.03  | 63.38  |
| 10  | 16711935 | Other                    |          | 60.4   | 61.35  | 62.25  | 62.6   | 63.15  | 63.45  | 64.23  |

|    |          |                        |       |       |       |       |       |       |       |
|----|----------|------------------------|-------|-------|-------|-------|-------|-------|-------|
| 11 | 197379   | Other                  | 60.5  | 61.05 | 61.23 | 61.63 | 62.13 | 62.67 | 63.05 |
| 12 | 13158400 | Other                  | 60.5  | 60.95 | 61.48 | 61.83 | 62.28 | 62.88 | 63.35 |
| 13 | 8504538  | Other                  | 60.88 | 61.3  | 62.1  | 62.32 | 62.95 | 63.87 | 64.65 |
| 14 | 8510085  | Other                  | 60.9  | 61.5  | 62.15 | 62.45 | 63.07 | 63.55 | 64.3  |
| 15 | 13491072 | Panax ginseng root dry | 60.35 | 61.1  | 61.67 | 62.2  | 62.55 | 63.05 | 63.48 |
| 16 | 14395776 | Other                  | 60.92 | 61.3  | 61.65 | 62.28 | 63    | 63.47 | 63.87 |
| 17 | 14450322 | Panax notoginseng      | 60.45 | 60.9  | 61.35 | 62.02 | 62.85 | 63.4  | 63.8  |

| No. | Color    | Name                     | Peak 8 | Peak 9 | Peak 10 | Peak 11 | Peak 12 | Peak 13 | Peak 14 |
|-----|----------|--------------------------|--------|--------|---------|---------|---------|---------|---------|
| 1   | 255      | QBG Phytolacca americana | 64.08  | 64.68  | 64.9    | 65.33   | 66.15   | 66.98   | 67.38   |
| 2   | 51400    | QBG Phytolacca japonica  | 65.1   | 65.8   | 66.25   | 66.65   | 67.2    | 67.85   | 68.53   |
| 3   | 16711680 | QBG Talinum crassifolium | 65.23  | 65.75  | 66.28   | 66.4    | 67.03   | 67.45   | 68.15   |
| 4   | 8388736  | QBG Talinum fruticosum   | 64.38  | 64.77  | 65.07   | 65.52   | 65.97   | 66.53   | 66.83   |
| 5   | 16744703 | QBG Talinum paniculatum  | 64.33  | 64.8   | 65.37   | 66.05   | 66.95   | 67.65   | 67.92   |
| 6   | 16744448 | QBG Talinum triangulare  | 63.92  | 64.25  | 64.73   | 65.18   | 65.67   | 66.2    | 66.73   |
| 7   | 8421376  | Other                    | 64.43  | 64.9   | 65.3    | 65.8    | 66.18   | 66.6    | 67.23   |
| 8   | 8421631  | Other                    | 64.8   | 65.22  | 65.77   | 66.18   | 66.45   | 67.05   | 67.32   |
| 9   | 1677088  | Other                    | 63.88  | 64.32  | 64.8    | 65.25   | 65.62   | 66.03   | 66.8    |
| 10  | 16711935 | Other                    | 64.82  | 65.32  | 65.97   | 66.35   | 66.88   | 67.8    | 68.35   |
| 11  | 197379   | Other                    | 63.37  | 63.78  | 64.2    | 64.75   | 65.33   | 65.9    | 66.3    |
| 12  | 13158400 | Other                    | 63.87  | 64.22  | 64.55   | 64.92   | 65.3    | 65.82   | 66.38   |
| 13  | 8504538  | Other                    | 65.1   | 66.1   | 66.52   | 67      | 67.4    | 68.3    | 68.9    |
| 14  | 8510085  | Other                    | 64.75  | 65.07  | 65.53   | 65.97   | 66.87   | 67.58   | 67.92   |
| 15  | 13491072 | Panax ginseng root dry   | 64.15  | 64.75  | 65.28   | 66      | 66.4    | 66.93   | 67.48   |
| 16  | 14395776 | Other                    | 64.15  | 64.7   | 65.28   | 65.83   | 66.27   | 66.7    | 67.13   |
| 17  | 14450322 | Panax notoginseng        | 64.07  | 64.57  | 65.22   | 65.75   | 66.45   | 66.92   | 67.25   |

| No. | Color    | Name                     | Peak 15 | Peak 16 | Peak 17 | Peak 18 | Peak 19 | Peak 20 | Peak 21 |
|-----|----------|--------------------------|---------|---------|---------|---------|---------|---------|---------|
| 1   | 255      | QBG Phytolacca americana | 67.75   | 68.23   | 68.65   | 69.35   | 69.77   | 70.6    | 71.27   |
| 2   | 51400    | QBG Phytolacca japonica  | 69.02   | 69.85   | 70.4    | 70.8    | 71.2    | 71.6    | 72.2    |
| 3   | 16711680 | QBG Talinum crassifolium | 68.43   | 68.82   | 69.3    | 69.9    | 70.7    | 71.18   | 71.7    |
| 4   | 8388736  | QBG Talinum fruticosum   | 67.47   | 67.93   | 68.35   | 69.02   | 69.43   | 70.03   | 70.7    |
| 5   | 16744703 | QBG Talinum paniculatum  | 68.38   | 68.6    | 69.7    | 70.07   | 70.48   | 71.03   | 71.72   |
| 6   | 16744448 | QBG Talinum triangulare  | 67.28   | 67.78   | 68.53   | 69.18   | 69.65   | 70.17   | 70.7    |
| 7   | 8421376  | Other                    | 67.73   | 68.2    | 68.45   | 69.18   | 69.88   | 70.22   | 70.8    |
| 8   | 8421631  | Other                    | 67.8    | 68.12   | 68.55   | 69.28   | 69.82   | 70.42   | 70.83   |
| 9   | 1677088  | Other                    | 67.45   | 67.88   | 68.3    | 69.32   | 69.75   | 70.12   | 70.7    |
| 10  | 16711935 | Other                    | 68.7    | 69.2    | 69.73   | 70.43   | 71      | 71.5    | 72      |



|    |          |                        |       |       |       |       |       |       |       |
|----|----------|------------------------|-------|-------|-------|-------|-------|-------|-------|
| 11 | 197379   | Other                  | 66.67 | 67.25 | 67.83 | 68.45 | 69.18 | 69.7  | 70.15 |
| 12 | 13158400 | Other                  | 66.93 | 67.28 | 67.92 | 68.43 | 68.8  | 69.28 | 69.97 |
| 13 | 8504538  | Other                  | 69.88 | 70.63 | 71.18 | 71.65 | 72.43 | 72.9  | 73.15 |
| 14 | 8510085  | Other                  | 68.4  | 68.88 | 69.35 | 69.8  | 70.48 | 71.07 | 71.45 |
| 15 | 13491072 | Panax ginseng root dry | 67.83 | 68.55 | 69.1  | 69.78 | 70.18 | 70.95 | 71.38 |
| 16 | 14395776 | Other                  | 67.75 | 68.62 | 69.23 | 69.7  | 70.23 | 70.78 | 71.25 |
| 17 | 14450322 | Panax notoginseng      | 67.72 | 68.1  | 68.4  | 68.8  | 69.27 | 69.93 | 70.32 |

| No. | Color    | Name                     | Peak 22 | Peak 23 | Peak 24 | Peak 25 | Peak 26 | Peak 27 | Peak 28 |
|-----|----------|--------------------------|---------|---------|---------|---------|---------|---------|---------|
| 1   | 255      | QBG Phytolacca americana | 71.92   | 72.42   | 72.88   | 73.6    | 74.02   | 74.45   | 74.9    |
| 2   | 51400    | QBG Phytolacca japonica  | 72.95   | 73.58   | 74.02   | 74.35   | 74.95   | 75.53   | 76.08   |
| 3   | 16711680 | QBG Talinum crassifolium | 72.38   | 72.85   | 73.5    | 73.92   | 74.4    | 74.88   | 75.33   |
| 4   | 8388736  | QBG Talinum fruticosum   | 70.83   | 71.72   | 72.4    | 72.93   | 73.7    | 74.17   | 74.57   |
| 5   | 16744703 | QBG Talinum paniculatum  | 72.07   | 72.62   | 73.43   | 73.9    | 74.7    | 75.1    | 75.65   |
| 6   | 16744448 | QBG Talinum triangulare  | 71.08   | 71.25   | 72.17   | 72.73   | 73.05   | 73.67   | 74.05   |
| 7   | 8421376  | Other                    | 71.25   | 71.65   | 72.13   | 72.9    | 73.25   | 73.58   | 74.03   |
| 8   | 8421631  | Other                    | 71.2    | 71.63   | 71.87   | 72.38   | 72.88   | 73.47   | 74.03   |
| 9   | 1677088  | Other                    | 71.23   | 71.7    | 72.12   | 72.62   | 73.03   | 73.72   | 74.35   |
| 10  | 16711935 | Other                    | 72.65   | 73.18   | 74.17   | 74.6    | 75.15   | 75.65   | 76.35   |
| 11  | 197379   | Other                    | 71.22   | 71.82   | 72.22   | 72.8    | 72.95   | 73.75   | 74.15   |
| 12  | 13158400 | Other                    | 70.25   | 71.22   | 71.68   | 71.95   | 72.33   | 72.85   | 73.57   |
| 13  | 8504538  | Other                    | 73.32   | 73.6    | 74.1    | 74.87   | 75.35   | 75.83   | 76.6    |
| 14  | 8510085  | Other                    | 72.2    | 72.63   | 72.97   | 73.88   | 74.68   | 75.25   | 75.82   |
| 15  | 13491072 | Panax ginseng root dry   | 72.05   | 72.45   | 72.9    | 73.28   | 73.48   | 73.95   | 74.12   |
| 16  | 14395776 | Other                    | 71.72   | 72.2    | 72.82   | 73.17   | 73.47   | 74.18   | 74.63   |
| 17  | 14450322 | Panax notoginseng        | 70.83   | 71.28   | 71.57   | 72.07   | 72.8    | 73.35   | 73.5    |

| No. | Color    | Name                     | Peak 29 | Peak 30 | Peak 31 | Peak 32 | Peak 33 | Peak 34 | Peak 35 |
|-----|----------|--------------------------|---------|---------|---------|---------|---------|---------|---------|
| 1   | 255      | QBG Phytolacca americana | 75.68   | 76.8    | 77.5    | 78.22   | 78.92   | 80.08   | 80.67   |
| 2   | 51400    | QBG Phytolacca japonica  | 76.52   | 76.9    | 77.4    | 77.75   | 78.13   | 78.55   | 79.6    |
| 3   | 16711680 | QBG Talinum crassifolium | 75.78   | 76.1    | 76.55   | 77      | 77.4    | 77.87   | 78.2    |
| 4   | 8388736  | QBG Talinum fruticosum   | 75.05   | 75.77   | 76.45   | 77.13   | 77.55   | 78      | 78.28   |
| 5   | 16744703 | QBG Talinum paniculatum  | 76.35   | 76.75   | 77.25   | 77.65   | 78.1    | 78.98   | 79.6    |
| 6   | 16744448 | QBG Talinum triangulare  | 74.67   | 75.07   | 75.6    | 76.15   | 76.53   | 76.87   | 77.3    |
| 7   | 8421376  | Other                    | 74.48   | 74.95   | 75.57   | 75.78   | 76.23   | 76.92   | 77.47   |
| 8   | 8421631  | Other                    | 74.33   | 74.92   | 75.35   | 75.83   | 76.62   | 77.07   | 77.48   |
| 9   | 1677088  | Other                    | 74.78   | 75.13   | 75.75   | 76.55   | 77.13   | 77.6    | 78.02   |
| 10  | 16711935 | Other                    | 76.85   | 77.2    | 77.7    | 78.32   | 78.95   | 79.5    | 80.07   |

|    |          |                        |       |       |       |       |       |       |       |
|----|----------|------------------------|-------|-------|-------|-------|-------|-------|-------|
| 11 | 197379   | Other                  | 74.58 | 75    | 75.58 | 76.18 | 76.87 | 77.35 | 77.97 |
| 12 | 13158400 | Other                  | 73.93 | 74.37 | 74.9  | 75.43 | 76.1  | 76.52 | 76.95 |
| 13 | 8504538  | Other                  | 77.07 | 77.47 | 77.85 | 78.27 | 78.95 | 79.35 | 79.9  |
| 14 | 8510085  | Other                  | 76.5  | 77.17 | 78    | 78.32 | 78.78 | 79.08 | 79.73 |
| 15 | 13491072 | Panax ginseng root dry | 74.65 | 75.15 | 75.65 | 76.33 | 76.78 | 77.23 | 77.73 |
| 16 | 14395776 | Other                  | 75    | 75.52 | 76.27 | 76.9  | 77.3  | 77.8  | 78.07 |
| 17 | 14450322 | Panax notoginseng      | 74.03 | 74.88 | 75.45 | 75.88 | 76.5  | 76.98 | 77.47 |

| No. | Color    | Name                     | Peak 36 | Peak 37 | Peak 38 | Peak 39 | Peak 40 | Peak 41 | Peak 42 |
|-----|----------|--------------------------|---------|---------|---------|---------|---------|---------|---------|
| 1   | 255      | QBG Phytolacca americana | 81.2    | 81.82   | 82.37   | 82.83   | 83.5    | 83.9    | 84.6    |
| 2   | 51400    | QBG Phytolacca japonica  | 80.2    | 80.8    | 81.12   | 81.55   | 82.08   | 83.2    | 84.75   |
| 3   | 16711680 | QBG Talinum crassifolium | 78.63   | 79.3    | 79.83   | 80.18   | 80.78   | 81.05   | 81.45   |
| 4   | 8388736  | QBG Talinum fruticosum   | 79.05   | 79.72   | 80.03   | 80.55   | 81      | 81.58   | 81.9    |
| 5   | 16744703 | QBG Talinum paniculatum  | 80.1    | 80.5    | 80.95   | 81.25   | 81.73   | 82.33   | 82.8    |
| 6   | 16744448 | QBG Talinum triangulare  | 77.77   | 78.12   | 78.68   | 79.5    | 80.15   | 80.85   | 81.42   |
| 7   | 8421376  | Other                    | 78.15   | 78.53   | 78.85   | 79.28   | 79.92   | 80.35   | 80.87   |
| 8   | 8421631  | Other                    | 77.85   | 78.25   | 78.73   | 79.35   | 79.77   | 80.18   | 80.7    |
| 9   | 1677088  | Other                    | 78.32   | 79.25   | 79.8    | 80.65   | 81.55   | 82.03   | 82.48   |
| 10  | 16711935 | Other                    | 80.53   | 80.9    | 81.3    | 81.83   | 82.37   | 82.8    | 83.42   |
| 11  | 197379   | Other                    | 78.65   | 79.5    | 80.13   | 80.75   | 81.23   | 82.15   | 82.87   |
| 12  | 13158400 | Other                    | 77.45   | 77.8    | 78.2    | 78.55   | 79.42   | 79.87   | 80.32   |
| 13  | 8504538  | Other                    | 80.12   | 80.6    | 81.15   | 82.15   | 82.95   | 83.67   | 84.35   |
| 14  | 8510085  | Other                    | 80.05   | 80.55   | 81.08   | 81.3    | 82.02   | 82.38   | 82.78   |
| 15  | 13491072 | Panax ginseng root dry   | 78.07   | 78.9    | 79.52   | 80.07   | 80.55   | 80.93   | 81.25   |
| 16  | 14395776 | Other                    | 78.6    | 79.18   | 79.53   | 80.28   | 81.15   | 81.58   | 82.13   |
| 17  | 14450322 | Panax notoginseng        | 77.83   | 78.25   | 78.88   | 79.35   | 79.85   | 80.3    | 81.1    |

| No. | Color    | Name                     | Peak 43 | Peak 44 | Peak 45 | Peak 46 | Peak 47 | Peak 48 | Peak 49 |
|-----|----------|--------------------------|---------|---------|---------|---------|---------|---------|---------|
| 1   | 255      | QBG Phytolacca americana | 85.55   | 87.2    | 89      | 89.55   |         |         |         |
| 2   | 51400    | QBG Phytolacca japonica  | 85.35   | 86.8    | 87.28   | 88.35   | 89.35   |         |         |
| 3   | 16711680 | QBG Talinum crassifolium | 81.85   | 82.55   | 83.05   | 83.8    | 84.55   | 85.13   | 85.93   |
| 4   | 8388736  | QBG Talinum fruticosum   | 82.37   | 82.78   | 83.45   | 84.1    | 84.67   | 85.38   | 85.85   |
| 5   | 16744703 | QBG Talinum paniculatum  | 83.48   | 85.17   | 86.97   | 87.57   | 88.23   | 89.4    |         |
| 6   | 16744448 | QBG Talinum triangulare  | 82.15   | 82.87   | 83.48   | 84.5    | 84.97   | 86.7    | 87.35   |
| 7   | 8421376  | Other                    | 82.08   | 83.02   | 83.22   | 83.72   | 84.4    | 85.15   | 85.63   |
| 8   | 8421631  | Other                    | 81.13   | 81.57   | 82.8    | 83.8    | 84.13   | 84.57   | 85.87   |
| 9   | 1677088  | Other                    | 82.92   | 83.47   | 83.85   | 84.42   | 84.92   | 85.4    | 85.88   |
| 10  | 16711935 | Other                    | 85.05   | 85.55   | 85.92   | 87.05   | 87.42   | 87.67   | 88.17   |

|    |          |                        |       |       |       |       |       |       |       |
|----|----------|------------------------|-------|-------|-------|-------|-------|-------|-------|
| 11 | 197379   | Other                  | 83.5  | 84.02 | 84.43 | 85.15 | 85.68 | 86.27 | 87.4  |
| 12 | 13158400 | Other                  | 80.77 | 81.15 | 81.95 | 82.18 | 82.87 | 83.57 | 83.98 |
| 13 | 8504538  | Other                  | 84.67 | 85.03 | 85.45 | 85.82 | 86.3  | 86.52 | 86.82 |
| 14 | 8510085  | Other                  | 84.75 | 85.38 | 85.87 | 87.6  | 88.2  | 88.55 | 89    |
| 15 | 13491072 | Panax ginseng root dry | 81.78 | 82.35 | 82.88 | 83.42 | 85.15 | 85.87 | 87.38 |
| 16 | 14395776 | Other                  | 82.55 | 82.97 | 83.57 | 84.45 | 84.85 | 87.33 |       |
| 17 | 14450322 | Panax notoginseng      | 81.5  | 81.98 | 82.1  | 82.68 | 83.13 | 83.65 | 84.15 |

| No. | Color    | Name                     | Peak 50 | Peak 51 | Peak 52 | Peak 53 | Peak 54 | Peak 55 | Peak 56 |
|-----|----------|--------------------------|---------|---------|---------|---------|---------|---------|---------|
| 1   | 255      | QBG Phytolacca americana |         |         |         |         |         |         |         |
| 2   | 51400    | QBG Phytolacca japonica  |         |         |         |         |         |         |         |
| 3   | 16711680 | QBG Talinum crassifolium | 86.45   | 87.2    | 87.65   |         |         |         |         |
| 4   | 8388736  | QBG Talinum fruticosum   | 86.72   | 87.15   | 87.63   | 88.23   | 89.05   | 89.42   |         |
| 5   | 16744703 | QBG Talinum paniculatum  |         |         |         |         |         |         |         |
| 6   | 16744448 | QBG Talinum triangulare  | 89.08   |         |         |         |         |         |         |
| 7   | 8421376  | Other                    | 86      | 86.55   | 87.25   | 87.97   | 88.4    | 88.82   | 89.35   |
| 8   | 8421631  | Other                    | 86.22   | 86.8    | 87.42   | 87.98   | 89.25   | 89.85   |         |
| 9   | 1677088  | Other                    | 86.22   | 86.78   | 87.17   | 87.62   | 88.15   | 89.1    | 89.63   |
| 10  | 16711935 | Other                    | 88.5    | 89.02   | 89.57   |         |         |         |         |
| 11  | 197379   | Other                    | 88      | 89.42   | 89.8    |         |         |         |         |
| 12  | 13158400 | Other                    | 84.85   | 85.23   | 86.55   | 87.25   | 88.4    | 88.75   | 89.3    |
| 13  | 8504538  | Other                    | 87.3    | 87.82   | 88.38   | 89.1    | 89.57   |         |         |
| 14  | 8510085  | Other                    | 89.32   |         |         |         |         |         |         |
| 15  | 13491072 | Panax ginseng root dry   | 88.13   | 88.85   | 89.5    |         |         |         |         |
| 16  | 14395776 | Other                    |         |         |         |         |         |         |         |
| 17  | 14450322 | Panax notoginseng        | 85.15   | 86.1    | 86.98   | 87.25   | 87.9    | 89.27   |         |

| No. | Color    | Name                     | Peak 57 |
|-----|----------|--------------------------|---------|
| 1   | 255      | QBG Phytolacca americana |         |
| 2   | 51400    | QBG Phytolacca japonica  |         |
| 3   | 16711680 | QBG Talinum crassifolium |         |
| 4   | 8388736  | QBG Talinum fruticosum   |         |
| 5   | 16744703 | QBG Talinum paniculatum  |         |
| 6   | 16744448 | QBG Talinum triangulare  |         |
| 7   | 8421376  | Other                    | 89.75   |
| 8   | 8421631  | Other                    |         |
| 9   | 1677088  | Other                    |         |
| 10  | 16711935 | Other                    |         |

- 11 197379 Other
  - 12 13158400 Other 89.75
  - 13 8504538 Other
  - 14 8510085 Other
  - 15 13491072 Panax ginseng root dry
  - 16 14395776 Other
  - 17 14450322 Panax notoginseng
- 

ITS(2)

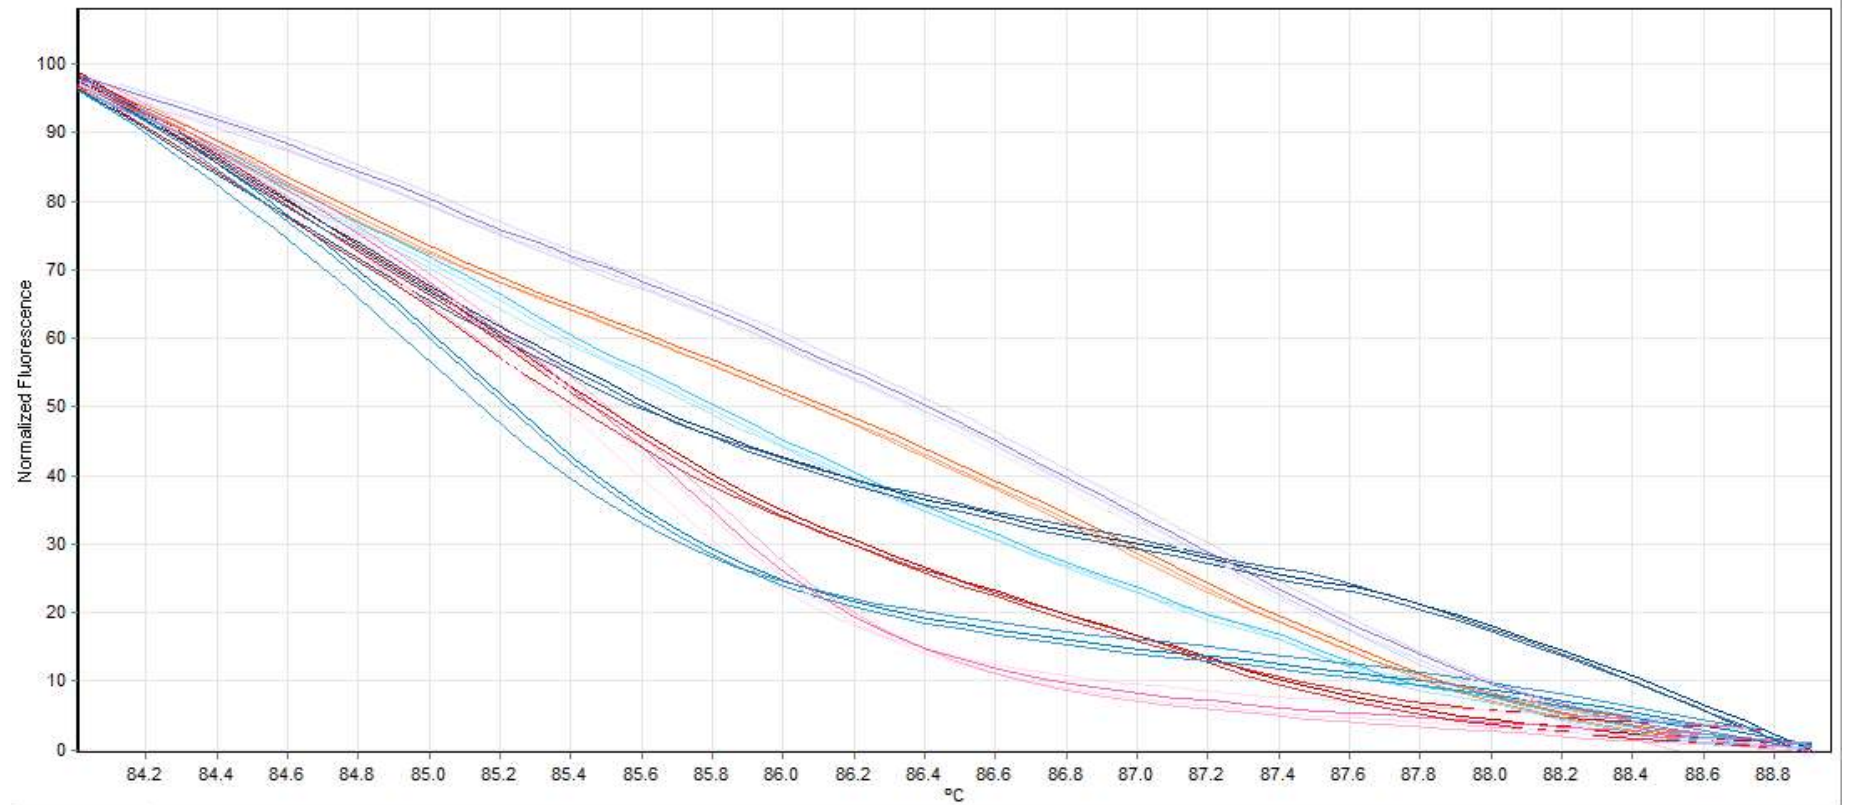

File panax HRM\_ITS2(3).rex

Operator

Run Id

Notes

Machine Serial No 814137

| Channel | Gain     |
|---------|----------|
| Green   | 5        |
| Yellow  | 5        |
| Orange  | 5        |
| Red     | 5        |
| HRM     | -2.33333 |
| Crimson | 7        |

| Channel | Threshold |
|---------|-----------|
|---------|-----------|

Cycling A.Green (Page 1)

HRM A.HRM (Page 0)

Melt analysis of HRM A.HRM (Page 1)

| No. | Color    | Name                     | Genotype | Peak 1 | Peak 2 | Peak 3 | Peak 4 | Peak 5 | Peak 6 | Peak 7 |
|-----|----------|--------------------------|----------|--------|--------|--------|--------|--------|--------|--------|
| 1   | 255      | QBG Phytolacca americana |          | 60.2   | 60.68  | 61.03  | 61.52  | 62.32  | 62.68  | 62.97  |
| 2   | 51400    | QBG Phytolacca japonica  |          | 60.77  | 61.18  | 61.9   | 62.9   | 63.55  | 64.22  | 64.7   |
| 3   | 16711680 | QBG Talinum crassifolium |          | 60.35  | 61.08  | 61.52  | 62.28  | 63.08  | 63.68  | 64.1   |
| 4   | 8388736  | QBG Talinum fruticosum   |          | 60.2   | 60.7   | 61.25  | 61.53  | 61.98  | 62.45  | 63.1   |
| 5   | 16744703 | QBG Talinum paniculatum  |          | 60.55  | 60.95  | 61.57  | 62.35  | 62.9   | 63.55  | 63.92  |
| 6   | 16744448 | QBG Talinum triangulare  |          | 60.88  | 61.32  | 61.55  | 62.5   | 62.88  | 63.4   | 64.12  |
| 7   | 8421376  | Talinum crassifolium     |          | 60.98  | 61.43  | 62.08  | 62.6   | 63.03  | 63.47  | 64.22  |
| 8   | 8421631  | Other                    |          | 60.25  | 60.75  | 61.23  | 61.55  | 62.15  | 62.53  | 63.1   |
| 9   | 1677088  | Other                    |          | 60.3   | 61.35  | 62.18  | 63.02  | 63.92  | 64.45  | 65.03  |
| 10  | 16711935 | Other                    |          | 60.55  | 61.3   | 61.45  | 61.65  | 62.12  | 62.9   | 63.72  |
| 11  | 197379   | Panax ginseng            |          | 60.85  | 61.55  | 62.18  | 62.87  | 63.4   | 63.65  | 64.7   |
| 12  | 13158400 | Panax notoginseng        |          | 60.3   | 61.23  | 61.77  | 62.33  | 62.87  | 63.48  | 64.15  |
| 13  | 8504538  | Talinum crassifolium     |          | 60.35  | 61.22  | 62.22  | 62.47  | 62.6   | 63.18  | 63.75  |

| No. | Color    | Name                     | Genotype | Peak 8  | Peak 9  | Peak 10 | Peak 11 | Peak 12 | Peak 13 | Peak 14 |
|-----|----------|--------------------------|----------|---------|---------|---------|---------|---------|---------|---------|
| 14  |          | 8510085 dH2O             |          | 60.25   | 60.52   | 61.52   | 62.25   | 63.05   | 63.85   | 64.43   |
| 1   | 255      | QBG Phytolacca americana |          | 63.35   | 63.92   | 64.45   | 65.17   | 65.7    | 66.08   | 66.82   |
| 2   | 51400    | QBG Phytolacca japonica  |          | 65.27   | 65.8    | 66.6    | 67.37   | 67.9    | 69.12   | 69.65   |
| 3   | 16711680 | QBG Talinum crassifolium |          | 64.65   | 65.15   | 65.93   | 66.72   | 67.07   | 67.6    | 67.95   |
| 4   | 8388736  | QBG Talinum fruticosum   |          | 64      | 64.47   | 64.75   | 65.2    | 65.73   | 66.45   | 67.02   |
| 5   | 16744703 | QBG Talinum paniculatum  |          | 64.43   | 64.92   | 65.32   | 65.7    | 66.52   | 67.2    | 67.52   |
| 6   | 16744448 | QBG Talinum triangulare  |          | 64.8    | 65.5    | 65.98   | 66.47   | 66.82   | 67.4    | 67.9    |
| 7   | 8421376  | Talinum crassifolium     |          | 64.75   | 65.3    | 65.93   | 66.45   | 67.12   | 67.45   | 67.9    |
| 8   | 8421631  | Other                    |          | 63.57   | 64.05   | 64.77   | 65.18   | 65.8    | 66.15   | 66.67   |
| 9   | 1677088  | Other                    |          | 65.75   | 66.65   | 67.15   | 67.62   | 68      | 68.57   | 69.37   |
| 10  | 16711935 | Other                    |          | 64.2    | 64.47   | 65.4    | 65.98   | 66.52   | 67.25   | 67.9    |
| 11  | 197379   | Panax ginseng            |          | 65.27   | 66      | 66.55   | 67.17   | 67.4    | 67.85   | 68.23   |
| 12  | 13158400 | Panax notoginseng        |          | 64.67   | 64.85   | 65.23   | 65.9    | 66.42   | 67.15   | 67.53   |
| 13  | 8504538  | Talinum crassifolium     |          | 64.12   | 64.75   | 65.17   | 65.95   | 66.57   | 66.95   | 67.72   |
| 14  | 8510085  | dH2O                     |          | 64.98   | 65.52   | 66.47   | 67.1    | 67.62   | 68.53   | 68.88   |
| No. | Color    | Name                     | Genotype | Peak 15 | Peak 16 | Peak 17 | Peak 18 | Peak 19 | Peak 20 | Peak 21 |
| 1   | 255      | QBG Phytolacca americana |          | 67.27   | 67.8    | 68.75   | 69.25   | 70      | 70.73   | 71.1    |
| 2   | 51400    | QBG Phytolacca japonica  |          | 70.15   | 70.75   | 71.3    | 71.75   | 72.2    | 72.78   | 73.15   |
| 3   | 16711680 | QBG Talinum crassifolium |          | 68.4    | 68.9    | 69      | 69.7    | 70.17   | 70.98   | 71.37   |
| 4   | 8388736  | QBG Talinum fruticosum   |          | 67.67   | 68.35   | 68.7    | 69.35   | 69.88   | 70.4    | 70.9    |
| 5   | 16744703 | QBG Talinum paniculatum  |          | 67.98   | 68.48   | 69      | 69.45   | 69.95   | 70.4    | 70.85   |
| 6   | 16744448 | QBG Talinum triangulare  |          | 68.23   | 68.63   | 69.1    | 69.55   | 70.28   | 70.75   | 71.25   |
| 7   | 8421376  | Talinum crassifolium     |          | 68.25   | 68.67   | 69.1    | 69.7    | 70.22   | 70.63   | 71.32   |
| 8   | 8421631  | Other                    |          | 67.13   | 67.8    | 68.43   | 69.15   | 69.7    | 70.37   | 70.95   |
| 9   | 1677088  | Other                    |          | 69.85   | 70.45   | 70.97   | 71.57   | 72.45   | 72.75   | 73.15   |
| 10  | 16711935 | Other                    |          | 68.2    | 68.75   | 69.47   | 69.97   | 70.43   | 70.83   | 71.23   |
| 11  | 197379   | Panax ginseng            |          | 68.75   | 69.1    | 69.55   | 70.17   | 70.65   | 71.22   | 71.87   |
| 12  | 13158400 | Panax notoginseng        |          | 67.88   | 68.27   | 68.62   | 69.12   | 69.72   | 70.17   | 70.85   |
| 13  | 8504538  | Talinum crassifolium     |          | 68.47   | 68.77   | 69.25   | 69.67   | 70.1    | 70.45   | 70.65   |
| 14  | 8510085  | dH2O                     |          | 69.47   | 69.93   | 70.4    | 70.97   | 71.6    | 72.5    | 73      |
| No. | Color    | Name                     | Genotype | Peak 22 | Peak 23 | Peak 24 | Peak 25 | Peak 26 | Peak 27 | Peak 28 |
| 1   | 255      | QBG Phytolacca americana |          | 71.77   | 72.25   | 72.67   | 73.12   | 73.77   | 74.75   | 75.35   |
| 2   | 51400    | QBG Phytolacca japonica  |          | 73.9    | 74.73   | 75.03   | 75.35   | 75.53   | 76.35   | 76.75   |
| 3   | 16711680 | QBG Talinum crassifolium |          | 72.32   | 72.88   | 73.18   | 73.6    | 74.22   | 74.73   | 75.32   |
| 4   | 8388736  | QBG Talinum fruticosum   |          | 71.5    | 72.22   | 72.63   | 73      | 73.62   | 74.27   | 74.73   |

|    |          |     |                      |       |       |       |       |       |       |       |
|----|----------|-----|----------------------|-------|-------|-------|-------|-------|-------|-------|
| 5  | 16744703 | QBG | Talinum paniculatum  | 71.13 | 71.77 | 72.13 | 72.57 | 72.85 | 73.48 | 73.95 |
| 6  | 16744448 | QBG | Talinum triangulare  | 71.8  | 72.25 | 72.8  | 73.47 | 73.97 | 75    | 75.68 |
| 7  | 8421376  |     | Talinum crassifolium | 72.18 | 72.85 | 73.3  | 73.77 | 74    | 74.77 | 75.15 |
| 8  | 8421631  |     | Other                | 71.4  | 72.3  | 72.75 | 73.18 | 73.68 | 74.2  | 74.62 |
| 9  | 1677088  |     | Other                | 73.55 | 74.25 | 74.8  | 75.35 | 75.98 | 76.43 | 76.9  |
| 10 | 16711935 |     | Other                | 71.78 | 72.28 | 72.52 | 73.05 | 73.43 | 73.9  | 74.55 |
| 11 | 197379   |     | Panax ginseng        | 72.85 | 73.35 | 73.9  | 74.6  | 74.98 | 75.43 | 76.05 |
| 12 | 13158400 |     | Panax notoginseng    | 71.3  | 72.18 | 72.83 | 73.25 | 73.72 | 74.03 | 74.75 |
| 13 | 8504538  |     | Talinum crassifolium | 71.5  | 72.27 | 72.72 | 73.65 | 74.27 | 74.65 | 75.38 |
| 14 | 8510085  |     | dH2O                 | 73.55 | 73.98 | 74.55 | 74.83 | 75.45 | 75.85 | 76.92 |

| No. | Color    | Name                     | Genotype | Peak 29 | Peak 30 | Peak 31 | Peak 32 | Peak 33 | Peak 34 | Peak 35 |
|-----|----------|--------------------------|----------|---------|---------|---------|---------|---------|---------|---------|
| 1   | 255      | QBG Phytolacca americana |          | 75.8    | 76.42   | 76.95   | 77.4    | 77.88   | 78.55   | 78.87   |
| 2   | 51400    | QBG Phytolacca japonica  |          | 77.2    | 77.8    | 78.35   | 78.85   | 79.5    | 80.03   | 80.35   |
| 3   | 16711680 | QBG Talinum crassifolium |          | 75.65   | 76.45   | 77.08   | 77.4    | 77.85   | 78.67   | 79.15   |
| 4   | 8388736  | QBG Talinum fruticosum   |          | 75.32   | 75.88   | 76.4    | 76.8    | 77.22   | 77.75   | 78.58   |
| 5   | 16744703 | QBG Talinum paniculatum  |          | 74.55   | 74.97   | 75.55   | 75.73   | 76.22   | 76.93   | 77.55   |
| 6   | 16744448 | QBG Talinum triangulare  |          | 75.98   | 76.45   | 76.85   | 77.37   | 78.18   | 78.6    | 79.05   |
| 7   | 8421376  | Talinum crassifolium     |          | 75.68   | 75.92   | 76.42   | 77.25   | 77.87   | 78.4    | 79.03   |
| 8   | 8421631  | Other                    |          | 75.62   | 76.68   | 77.12   | 77.6    | 78.5    | 79.45   | 79.87   |
| 9   | 1677088  | Other                    |          | 77.6    | 78.05   | 78.55   | 78.92   | 79.42   | 80.45   | 80.95   |
| 10  | 16711935 | Other                    |          | 75.05   | 75.7    | 76.15   | 76.9    | 77.25   | 77.6    | 78.05   |
| 11  | 197379   | Panax ginseng            |          | 76.45   | 76.85   | 77.35   | 77.72   | 78.18   | 78.57   | 79.13   |
| 12  | 13158400 | Panax notoginseng        |          | 75.23   | 75.65   | 76.32   | 76.65   | 77.25   | 77.87   | 78.47   |
| 13  | 8504538  | Talinum crassifolium     |          | 75.63   | 76.5    | 77.02   | 77.5    | 77.9    | 78.45   | 79.25   |
| 14  | 8510085  | dH2O                     |          | 77.72   | 78.1    | 78.67   | 78.9    | 79.33   | 80      | 80.9    |

| No. | Color    | Name                     | Genotype | Peak 36 | Peak 37 | Peak 38 | Peak 39 | Peak 40 | Peak 41 | Peak 42 |
|-----|----------|--------------------------|----------|---------|---------|---------|---------|---------|---------|---------|
| 1   | 255      | QBG Phytolacca americana |          | 79.42   | 80.2    | 80.82   | 81.27   | 82.1    | 82.85   | 83.33   |
| 2   | 51400    | QBG Phytolacca japonica  |          | 80.8    | 81.3    | 81.67   | 82.18   | 83.05   | 83.6    | 84.03   |
| 3   | 16711680 | QBG Talinum crassifolium |          | 79.78   | 80.6    | 81.25   | 82.1    | 82.7    | 83.13   | 84.3    |
| 4   | 8388736  | QBG Talinum fruticosum   |          | 79.25   | 79.95   | 80.5    | 80.95   | 81.53   | 82.08   | 82.37   |
| 5   | 16744703 | QBG Talinum paniculatum  |          | 78.05   | 78.67   | 80.03   | 80.35   | 80.87   | 81.5    | 82.38   |
| 6   | 16744448 | QBG Talinum triangulare  |          | 79.45   | 79.85   | 80.35   | 80.85   | 81.62   | 82.35   | 82.95   |
| 7   | 8421376  | Talinum crassifolium     |          | 79.42   | 79.8    | 80.3    | 80.78   | 81.05   | 81.82   | 82.65   |
| 8   | 8421631  | Other                    |          | 80.37   | 80.63   | 81.15   | 82.17   | 82.53   | 84.25   | 84.77   |
| 9   | 1677088  | Other                    |          | 81.47   | 82.12   | 82.38   | 82.83   | 83.55   | 84.18   | 84.65   |
| 10  | 16711935 | Other                    |          | 78.55   | 78.93   | 79.5    | 80.07   | 80.45   | 80.82   | 81.37   |

|    |          |                      |       |       |       |       |       |       |       |
|----|----------|----------------------|-------|-------|-------|-------|-------|-------|-------|
| 11 | 197379   | Panax ginseng        | 79.63 | 80.33 | 80.85 | 81.78 | 82.43 | 83.23 | 83.75 |
| 12 | 13158400 | Panax notoginseng    | 79.05 | 79.85 | 80.35 | 80.63 | 81.05 | 81.88 | 82.35 |
| 13 | 8504538  | Talinum crassifolium | 79.93 | 80.65 | 80.97 | 81.25 | 82.1  | 82.83 | 83.48 |
| 14 | 8510085  | dH2O                 | 81.5  | 82.32 | 82.8  | 83.3  | 83.83 | 84.25 | 84.62 |

| No. | Color    | Name                     | Genotype | Peak 43 | Peak 44 | Peak 45 | Peak 46 | Peak 47 | Peak 48 | Peak 49 |
|-----|----------|--------------------------|----------|---------|---------|---------|---------|---------|---------|---------|
| 1   | 255      | QBG Phytolacca americana |          | 83.75   | 84.17   | 84.55   | 84.9    | 85.98   | 86.73   | 87.15   |
| 2   | 51400    | QBG Phytolacca japonica  |          | 84.45   | 84.93   | 85.57   | 86.32   | 86.7    | 87      | 88.95   |
| 3   | 16711680 | QBG Talinum crassifolium |          | 84.82   | 85.83   | 86.48   | 86.82   | 87.2    | 87.65   | 89.07   |
| 4   | 8388736  | QBG Talinum fruticosum   |          | 82.8    | 83.5    | 84.3    | 84.75   | 85.78   | 86.28   | 86.92   |
| 5   | 16744703 | QBG Talinum paniculatum  |          | 82.92   | 83.35   | 84.03   | 84.72   | 85.75   | 86.03   | 86.75   |
| 6   | 16744448 | QBG Talinum triangulare  |          | 83.25   | 84.35   | 84.9    | 85.25   | 85.65   | 86.18   | 86.65   |
| 7   | 8421376  | Talinum crassifolium     |          | 83.48   | 84.05   | 84.72   | 85.6    | 86.58   | 87.03   | 87.33   |
| 8   | 8421631  | Other                    |          | 85.9    | 86.48   | 86.82   | 87.15   | 87.57   | 89.1    | 89.55   |
| 9   | 1677088  | Other                    |          | 85.08   | 85.55   | 86.4    | 86.92   | 87.42   | 88.67   | 89.3    |
| 10  | 16711935 | Other                    |          | 81.83   | 82.42   | 82.85   | 83.3    | 84.07   | 84.45   | 84.8    |
| 11  | 197379   | Panax ginseng            |          | 84.32   | 84.92   | 86.13   | 86.63   | 87.07   | 87.77   | 89.3    |
| 12  | 13158400 | Panax notoginseng        |          | 82.6    | 83.07   | 83.48   | 84      | 84.45   | 84.97   | 85.62   |
| 13  | 8504538  | Talinum crassifolium     |          | 83.88   | 84.25   | 84.8    | 85.12   | 85.8    | 86.5    | 86.95   |
| 14  | 8510085  | dH2O                     |          | 85.17   | 85.98   | 86.3    | 86.8    | 87.5    | 88.3    | 88.7    |

| No. | Color    | Name                     | Genotype | Peak 50 | Peak 51 | Peak 52 | Peak 53 | Peak 54 | Peak 55 | Peak 56 |
|-----|----------|--------------------------|----------|---------|---------|---------|---------|---------|---------|---------|
| 1   | 255      | QBG Phytolacca americana |          | 87.65   | 88.15   | 88.75   | 89.6    | 89.95   | 91.65   |         |
| 2   | 51400    | QBG Phytolacca japonica  |          | 89.55   | 90.15   | 90.78   | 91.18   | 91.63   |         |         |
| 3   | 16711680 | QBG Talinum crassifolium |          | 89.62   | 89.92   | 90.48   | 91.02   | 91.52   |         |         |
| 4   | 8388736  | QBG Talinum fruticosum   |          | 88.02   | 88.72   | 89.25   | 89.83   | 90.6    | 91.02   | 91.4    |
| 5   | 16744703 | QBG Talinum paniculatum  |          | 87.62   | 88.05   | 88.75   | 89.3    | 89.8    | 90.07   | 90.85   |
| 6   | 16744448 | QBG Talinum triangulare  |          | 87.08   | 87.45   | 89.25   | 90.35   | 90.8    | 91.18   |         |
| 7   | 8421376  | Talinum crassifolium     |          | 89.03   | 89.55   | 90.12   | 90.95   | 91.55   |         |         |
| 8   | 8421631  | Other                    |          | 89.92   | 90.45   | 91.05   | 91.53   |         |         |         |
| 9   | 1677088  | Other                    |          | 89.82   | 90.58   | 91.15   | 91.4    |         |         |         |
| 10  | 16711935 | Other                    |          | 85.27   | 86.15   | 86.75   | 88.82   | 89.3    | 90.63   | 91.4    |
| 11  | 197379   | Panax ginseng            |          | 90.05   | 90.25   | 90.73   | 91.22   | 91.8    |         |         |
| 12  | 13158400 | Panax notoginseng        |          | 86.98   | 87.4    | 88.35   | 88.93   | 89.57   | 90.13   | 90.88   |
| 13  | 8504538  | Talinum crassifolium     |          | 87.17   | 87.62   | 88.6    | 89.08   | 90.47   | 91.55   |         |
| 14  | 8510085  | dH2O                     |          | 89.78   | 90.55   | 91.42   |         |         |         |         |

| No. | Color | Name                     | Genotype | Peak 57 | Peak 58 |
|-----|-------|--------------------------|----------|---------|---------|
| 1   | 255   | QBG Phytolacca americana |          |         |         |



|    |              |                      |       |       |
|----|--------------|----------------------|-------|-------|
| 2  | 51400 QBG    | Phytolacca japonica  |       |       |
| 3  | 16711680 QBG | Talinum crassifolium |       |       |
| 4  | 8388736 QBG  | Talinum fruticosum   |       |       |
| 5  | 16744703 QBG | Talinum paniculatum  | 91.3  |       |
| 6  | 16744448 QBG | Talinum triangulare  |       |       |
| 7  | 8421376      | Talinum crassifolium |       |       |
| 8  | 8421631      | Other                |       |       |
| 9  | 1677088      | Other                |       |       |
| 10 | 16711935     | Other                |       |       |
| 11 | 197379       | Panax ginseng        |       |       |
| 12 | 13158400     | Panax notoginseng    | 91.18 | 91.55 |
| 13 | 8504538      | Talinum crassifolium |       |       |
| 14 | 8510085      | dH2O                 |       |       |

ITS(3)

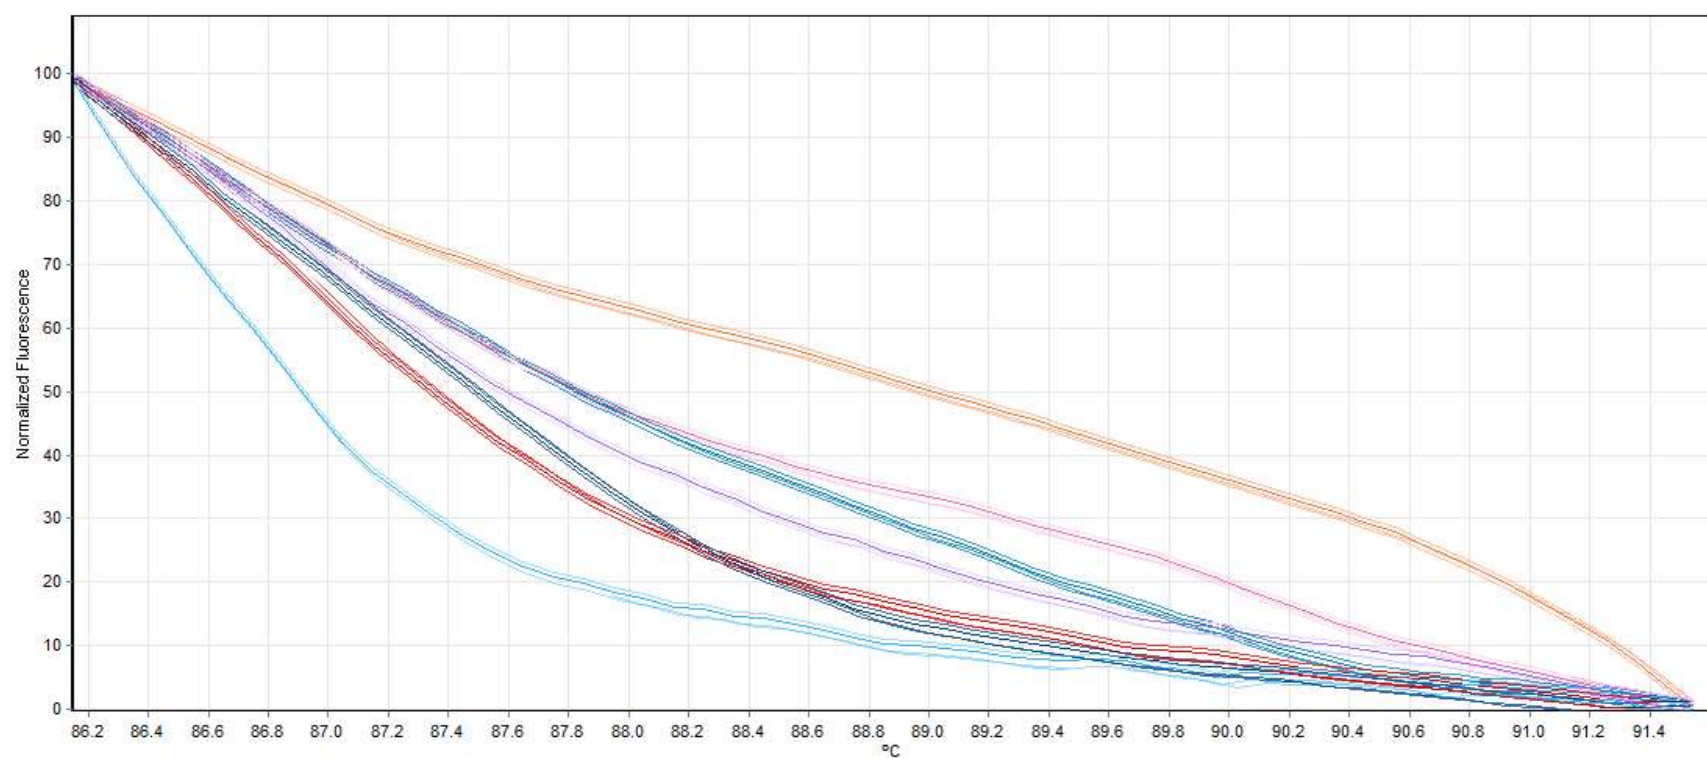

Supplement: Supplementary_file_1_pdf_Revised.pdf [file Supplementary_file_1_pdf_Revised.pdf]
